# Supplementary material
Source: publisher figshare collection journal article supplement (https://diabetesjournals.figshare.com/articles/dataset/_/24794355)
Supplement: Supplementary file 1 [file 43609578]

**Risk assessment for gastrointestinal diseases via clinical dimension and genome-wide polygenic risk scores of type 2 diabetes: a population-based cohort study**

|                                                                                                                                                                                             |                  |
|---------------------------------------------------------------------------------------------------------------------------------------------------------------------------------------------|------------------|
| <b><i>Supplementary figure 1 Polygenic risk scores of participants .....</i></b>                                                                                                            | <b><i>3</i></b>  |
| <b><i>Supplementary table 1 Criteria for participants excluded.....</i></b>                                                                                                                 | <b><i>4</i></b>  |
| <b><i>Supplementary table 2 Genetic variants associated with type 2 diabetes .....</i></b>                                                                                                  | <b><i>5</i></b>  |
| <b><i>Supplementary table 3 Genetic variants associated with BMI, leptin, incretin lipids, liver enzymes and pancreatic enzymes .....</i></b>                                               | <b><i>25</i></b> |
| <b><i>Supplementary table 4 Missing rate (%) of covariables.....</i></b>                                                                                                                    | <b><i>26</i></b> |
| <b><i>Supplementary table 5 ORs and CIs for the association between the PRS of type 2 diabetes and gastrointestinal diseases. ....</i></b>                                                  | <b><i>27</i></b> |
| <b><i>Supplementary table 6 ORs and CIs for the association between the PRS of type 2 diabetes and gastrointestinal diseases stratified by status of baseline type 2 diabetes. ....</i></b> | <b><i>30</i></b> |
| <b><i>Supplementary table 7 ORs and CIs for the association between PRS of different traits and gastrointestinal diseases. ....</i></b>                                                     | <b><i>33</i></b> |

|                                                                                                                                                                                                                     |           |
|---------------------------------------------------------------------------------------------------------------------------------------------------------------------------------------------------------------------|-----------|
| <b>Supplementary table 8 Adjusted hazard ratios for incident gastrointestinal diseases according to diabetes duration of baseline type 2 diabetes.....</b>                                                          | <b>45</b> |
| <b>Supplementary table 9 Adjusted hazard ratios for incident gastrointestinal diseases according to HbA1c level of baseline type 2 diabetes .....</b>                                                               | <b>48</b> |
| <b>Supplementary table 10 Adjusted hazard ratios for incident gastrointestinal diseases according to use of diabetes medication.....</b>                                                                            | <b>50</b> |
| <b>Supplementary table 11 Adjusted hazard ratios for incident gastrointestinal diseases according to baseline type 2 diabetes stratified by age, sex, body mass index, smoking status, and drinking status.....</b> | <b>52</b> |
| <b>Supplementary table 12 Adjusted hazard ratios for incident gastrointestinal diseases according to baseline type 2 diabetes (new definition of type 2 diabetes) .....</b>                                         | <b>56</b> |
| <b>Supplementary table 13 Adjusted hazard ratios for incident gastrointestinal diseases according to baseline type 2 diabetes in sensitive analyses .....</b>                                                       | <b>57</b> |
| <b>Supplementary table 14 Results of step function for analysis of unmet proportional assumption assumptions over different time intervals (0-5, 5-10, 10- follow-up years) .....</b>                               | <b>60</b> |

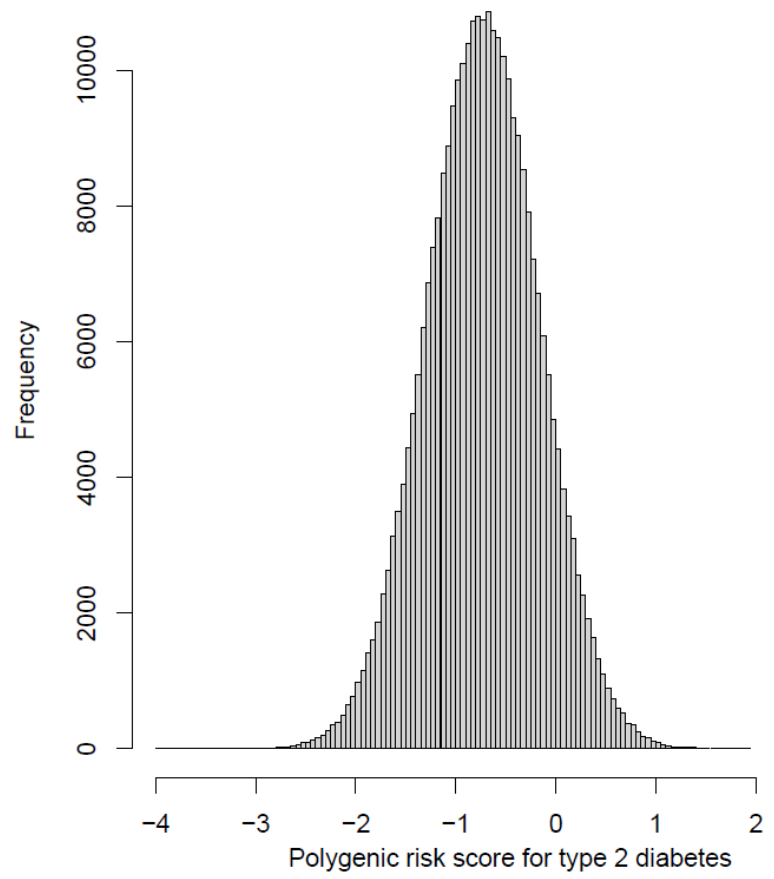

**Supplementary figure 1 Polygenic risk scores of participants**

**Supplementary table 1 Criteria for participants excluded**

| <b>Participants excluded</b>                        | <b>Criteria</b>                                                                                                                                                                                                                                                                                                                        | <b>How to diagnose</b>                                                       |
|-----------------------------------------------------|----------------------------------------------------------------------------------------------------------------------------------------------------------------------------------------------------------------------------------------------------------------------------------------------------------------------------------------|------------------------------------------------------------------------------|
| <b>Individuals with GI diseases at baseline</b>     | Participants who had GI diseases before they attended the UK Biobank assessment centre.                                                                                                                                                                                                                                                | Hospital inpatient, death registry, primary care data and self-reported data |
| <b>Individuals with type 1 diabetes at baseline</b> | Participants who had type 1 diabetes before they attended the UK Biobank assessment centre.                                                                                                                                                                                                                                            | Hospital inpatient, death registry, primary care data and self-reported data |
| <b>Newly onset type 2 diabetes during follow up</b> | Participants who without type 2 diabetes before they attended the UK Biobank assessment centre but had incident type 2 diabetes from the day attending a UK Biobank assessment centre to the date of the last data collection for the practice (March 31, 2021 for England, March 31, 2021 for Scotland, February 28, 2018 for Wales). | Hospital inpatient, death registry, primary care data                        |

**Supplementary table 2 Genetic variants associated with type 2 diabetes**

| Trait | SNP        | Chr | Position  | Effect allele | Oher allele | EAf    | Beta    | Se     | P        |
|-------|------------|-----|-----------|---------------|-------------|--------|---------|--------|----------|
| T2DM  | rs11583755 | 1   | 6672729   | C             | A           | 0.3287 | 0.0369  | 0.0041 | 1.31E-19 |
| T2DM  | rs7554251  | 1   | 11317932  | C             | T           | 0.7016 | 0.0297  | 0.0045 | 2.86E-11 |
| T2DM  | rs10916780 | 1   | 20707153  | G             | A           | 0.2476 | -0.0342 | 0.0046 | 1.58E-13 |
| T2DM  | rs9438610  | 1   | 26396065  | G             | A           | 0.1966 | -0.0313 | 0.0051 | 6.74E-10 |
| T2DM  | rs3753693  | 1   | 29060898  | C             | T           | 0.549  | 0.0255  | 0.004  | 1.11E-10 |
| T2DM  | rs2269247  | 1   | 64107284  | C             | T           | 0.8094 | 0.0356  | 0.0049 | 3.40E-13 |
| T2DM  | rs10889560 | 1   | 65989878  | C             | A           | 0.8891 | -0.0376 | 0.0063 | 2.05E-09 |
| T2DM  | rs4655617  | 1   | 67010654  | C             | A           | 0.4786 | 0.0256  | 0.004  | 1.68E-10 |
| T2DM  | rs2613499  | 1   | 72751552  | G             | A           | 0.199  | -0.0363 | 0.0053 | 1.04E-11 |
| T2DM  | rs197374   | 1   | 112289983 | C             | T           | 0.5929 | -0.0224 | 0.0039 | 7.76E-09 |
| T2DM  | rs2282456  | 1   | 118169463 | G             | A           | 0.7154 | -0.0351 | 0.0042 | 7.43E-17 |
| T2DM  | rs3020781  | 1   | 155269776 | G             | A           | 0.3719 | 0.0294  | 0.0043 | 7.29E-12 |
| T2DM  | rs7546252  | 1   | 172368310 | G             | A           | 0.5727 | -0.0262 | 0.0041 | 2.00E-10 |
| T2DM  | rs41304257 | 1   | 201849926 | G             | A           | 0.2441 | -0.0318 | 0.0047 | 8.48E-12 |
| T2DM  | rs11096542 | 2   | 18707873  | G             | A           | 0.3756 | -0.0254 | 0.0043 | 3.03E-09 |
| T2DM  | rs72803684 | 2   | 26192802  | C             | T           | 0.9555 | -0.0666 | 0.0115 | 6.07E-09 |
| T2DM  | rs34506349 | 2   | 100598726 | G             | A           | 0.9609 | 0.0665  | 0.0116 | 1.04E-08 |
| T2DM  | rs10469860 | 2   | 105165674 | G             | A           | 0.2755 | -0.0238 | 0.0043 | 3.84E-08 |
| T2DM  | rs74677818 | 2   | 112823114 | C             | T           | 0.8646 | -0.0357 | 0.006  | 2.88E-09 |
| T2DM  | rs6716394  | 2   | 146350724 | G             | A           | 0.4844 | 0.0275  | 0.0037 | 1.46E-13 |
| T2DM  | rs3845843  | 2   | 152198598 | C             | T           | 0.4918 | -0.0264 | 0.0038 | 2.39E-12 |
| T2DM  | rs13406280 | 2   | 166610827 | C             | T           | 0.566  | 0.0269  | 0.0039 | 5.66E-12 |
| T2DM  | rs12992995 | 2   | 175197545 | C             | A           | 0.7548 | 0.0272  | 0.0048 | 1.12E-08 |

---

|      |            |   |           |   |   |        |         |        |          |
|------|------------|---|-----------|---|---|--------|---------|--------|----------|
| T2DM | rs6715901  | 2 | 179650954 | G | A | 0.5728 | 0.023   | 0.004  | 1.17E-08 |
| T2DM | rs6741676  | 2 | 181618654 | G | A | 0.3067 | -0.0324 | 0.0042 | 6.52E-15 |
| T2DM | rs6714523  | 2 | 203235139 | G | A | 0.8807 | -0.0401 | 0.0061 | 6.29E-11 |
| T2DM | rs34329895 | 2 | 208870017 | G | A | 0.5376 | -0.0255 | 0.004  | 1.44E-10 |
| T2DM | rs3828242  | 2 | 212274937 | G | A | 0.2696 | -0.0252 | 0.0043 | 6.50E-09 |
| T2DM | rs4673712  | 2 | 213829721 | C | T | 0.2897 | -0.0269 | 0.0045 | 1.65E-09 |
| T2DM | rs3872707  | 3 | 9514016   | G | A | 0.844  | -0.037  | 0.0054 | 9.76E-12 |
| T2DM | rs924753   | 3 | 15706124  | G | A | 0.4649 | 0.0263  | 0.0039 | 1.15E-11 |
| T2DM | rs1470560  | 3 | 35670150  | G | A | 0.6433 | -0.0245 | 0.004  | 1.22E-09 |
| T2DM | rs853866   | 3 | 71648868  | T | A | 0.6109 | 0.0244  | 0.0044 | 2.72E-08 |
| T2DM | rs6549112  | 3 | 86756871  | G | T | 0.3328 | -0.0268 | 0.004  | 1.59E-11 |
| T2DM | rs7645613  | 3 | 115063672 | C | T | 0.3572 | 0.034   | 0.0048 | 1.52E-12 |
| T2DM | rs9857204  | 3 | 131750844 | G | A | 0.7085 | -0.0272 | 0.0043 | 2.17E-10 |
| T2DM | rs667920   | 3 | 136069472 | G | T | 0.2332 | -0.0324 | 0.0045 | 5.83E-13 |
| T2DM | rs6766859  | 3 | 138055136 | C | T | 0.3864 | 0.0275  | 0.004  | 8.12E-12 |
| T2DM | rs56243018 | 3 | 141101839 | C | A | 0.046  | -0.0833 | 0.0104 | 8.89E-16 |
| T2DM | rs28712435 | 3 | 149221563 | C | T | 0.5483 | 0.0254  | 0.0039 | 6.10E-11 |
| T2DM | rs61579137 | 3 | 184882015 | G | A | 0.6599 | -0.0309 | 0.0047 | 5.05E-11 |
| T2DM | rs9872347  | 3 | 195831237 | C | T | 0.6736 | 0.0318  | 0.0042 | 5.44E-14 |
| T2DM | rs7664347  | 4 | 20265535  | C | T | 0.6601 | -0.0234 | 0.0041 | 9.52E-09 |
| T2DM | rs6835992  | 4 | 76496817  | G | A | 0.7049 | 0.0287  | 0.0044 | 5.64E-11 |
| T2DM | rs4440243  | 4 | 77017680  | C | T | 0.4217 | -0.0246 | 0.0043 | 9.95E-09 |
| T2DM | rs17035289 | 4 | 106048291 | C | T | 0.2062 | 0.0357  | 0.0048 | 1.53E-13 |
| T2DM | rs4834232  | 4 | 129024273 | C | T | 0.787  | -0.0272 | 0.0047 | 9.42E-09 |
| T2DM | rs12505942 | 4 | 140906390 | C | T | 0.3133 | -0.0294 | 0.0042 | 1.83E-12 |
| T2DM | rs35901985 | 4 | 186580062 | G | A | 0.1853 | -0.0332 | 0.0053 | 2.60E-10 |

---

---

|      |             |   |           |   |   |        |         |        |          |
|------|-------------|---|-----------|---|---|--------|---------|--------|----------|
| T2DM | rs114136102 | 5 | 36084426  | C | T | 0.0384 | 0.0631  | 0.0114 | 2.81E-08 |
| T2DM | rs6870983   | 5 | 87697533  | C | T | 0.7415 | 0.0287  | 0.0049 | 6.32E-09 |
| T2DM | rs217256    | 5 | 137431501 | C | T | 0.4926 | 0.021   | 0.0037 | 1.36E-08 |
| T2DM | rs727734    | 6 | 15475051  | T | A | 0.2363 | -0.0292 | 0.0045 | 6.68E-11 |
| T2DM | rs10806906  | 6 | 19751516  | C | T | 0.4479 | 0.0223  | 0.0039 | 1.01E-08 |
| T2DM | rs75080135  | 6 | 33552707  | C | A | 0.2074 | -0.0357 | 0.0049 | 2.40E-13 |
| T2DM | rs7758115   | 6 | 126061502 | G | A | 0.4997 | -0.0232 | 0.0039 | 3.69E-09 |
| T2DM | rs9390022   | 6 | 143056556 | C | T | 0.3361 | -0.0306 | 0.0041 | 5.00E-14 |
| T2DM | rs7758002   | 6 | 153440770 | G | T | 0.5238 | -0.0317 | 0.0039 | 4.63E-16 |
| T2DM | rs62452060  | 7 | 4683572   | G | A | 0.8638 | -0.0354 | 0.0059 | 1.71E-09 |
| T2DM | rs13237518  | 7 | 12269593  | C | A | 0.5207 | -0.0283 | 0.0038 | 1.99E-13 |
| T2DM | rs38221     | 7 | 15926228  | C | T | 0.764  | -0.0286 | 0.0047 | 1.51E-09 |
| T2DM | rs583769    | 7 | 18331915  | G | A | 0.7164 | -0.0307 | 0.0043 | 7.78E-13 |
| T2DM | rs17439448  | 7 | 40816653  | C | T | 0.8842 | -0.0393 | 0.0067 | 3.74E-09 |
| T2DM | rs12539264  | 7 | 48839003  | G | A | 0.2656 | 0.029   | 0.0045 | 8.57E-11 |
| T2DM | rs73121277  | 7 | 50577968  | C | T | 0.2966 | 0.026   | 0.0042 | 7.40E-10 |
| T2DM | rs13238568  | 7 | 74076493  | G | A | 0.381  | 0.0248  | 0.0041 | 1.72E-09 |
| T2DM | rs6956980   | 7 | 89803634  | C | T | 0.4669 | 0.0284  | 0.0038 | 9.55E-14 |
| T2DM | rs506597    | 7 | 100313420 | G | A | 0.8812 | 0.041   | 0.0064 | 1.51E-10 |
| T2DM | rs12056338  | 8 | 12643055  | G | T | 0.6086 | -0.0251 | 0.004  | 2.18E-10 |
| T2DM | rs35753840  | 8 | 14148990  | C | A | 0.34   | 0.0254  | 0.0042 | 9.65E-10 |
| T2DM | rs6558173   | 8 | 22492103  | G | T | 0.6556 | -0.0245 | 0.004  | 7.26E-10 |
| T2DM | rs11998023  | 8 | 25871721  | G | T | 0.1765 | 0.0324  | 0.0053 | 9.00E-10 |
| T2DM | rs3887059   | 8 | 57496064  | G | A | 0.7364 | -0.0295 | 0.0043 | 5.12E-12 |
| T2DM | rs112515915 | 8 | 105662373 | G | A | 0.0691 | -0.0562 | 0.0085 | 3.18E-11 |
| T2DM | rs3802219   | 8 | 116565365 | C | T | 0.6082 | -0.0357 | 0.0039 | 1.07E-19 |

---

---

|      |            |    |           |   |   |        |         |        |          |
|------|------------|----|-----------|---|---|--------|---------|--------|----------|
| T2DM | rs1567353  | 9  | 1033773   | G | C | 0.3612 | 0.0278  | 0.004  | 7.06E-12 |
| T2DM | rs7029718  | 9  | 23358495  | G | A | 0.596  | -0.0273 | 0.0039 | 1.47E-12 |
| T2DM | rs654629   | 9  | 85312075  | G | C | 0.6079 | 0.0266  | 0.0039 | 5.18E-12 |
| T2DM | rs10119430 | 9  | 111938268 | G | A | 0.2209 | 0.0279  | 0.0046 | 1.76E-09 |
| T2DM | rs1431819  | 9  | 116943357 | G | A | 0.7075 | 0.0294  | 0.0046 | 1.99E-10 |
| T2DM | rs10818763 | 9  | 125689694 | C | T | 0.676  | 0.0358  | 0.0051 | 2.41E-12 |
| T2DM | rs379417   | 9  | 136890704 | G | A | 0.6491 | -0.0278 | 0.0042 | 4.80E-11 |
| T2DM | rs11258422 | 10 | 13540869  | C | A | 0.4091 | 0.0241  | 0.0041 | 3.18E-09 |
| T2DM | rs71495046 | 10 | 33997227  | C | A | 0.121  | 0.0399  | 0.0063 | 1.86E-10 |
| T2DM | rs827237   | 10 | 72648336  | C | T | 0.8128 | -0.0294 | 0.0053 | 2.53E-08 |
| T2DM | rs945187   | 10 | 99091369  | G | A | 0.4199 | 0.031   | 0.0039 | 8.24E-16 |
| T2DM | rs2482506  | 10 | 104563743 | G | C | 0.2389 | -0.0316 | 0.0045 | 2.26E-12 |
| T2DM | rs7941510  | 11 | 8677063   | C | A | 0.6493 | 0.0353  | 0.0042 | 1.87E-17 |
| T2DM | rs76789970 | 11 | 9856015   | C | T | 0.8868 | -0.0387 | 0.006  | 9.24E-11 |
| T2DM | rs174541   | 11 | 61565908  | C | T | 0.3493 | -0.0277 | 0.0041 | 2.39E-11 |
| T2DM | rs1662185  | 11 | 64100776  | G | A | 0.576  | -0.0226 | 0.0041 | 3.48E-08 |
| T2DM | rs2513505  | 11 | 76230357  | C | A | 0.4068 | -0.024  | 0.0038 | 4.10E-10 |
| T2DM | rs7316626  | 12 | 6691452   | G | A | 0.7968 | -0.0322 | 0.0054 | 3.33E-09 |
| T2DM | rs10844519 | 12 | 33410855  | G | T | 0.4092 | 0.03    | 0.0042 | 1.36E-12 |
| T2DM | rs2730827  | 12 | 41863393  | C | T | 0.5145 | -0.0279 | 0.0038 | 2.10E-13 |
| T2DM | rs2732469  | 12 | 48712932  | T | A | 0.584  | 0.0316  | 0.0042 | 4.82E-14 |
| T2DM | rs7132908  | 12 | 50263148  | G | A | 0.6431 | -0.0297 | 0.004  | 7.44E-14 |
| T2DM | rs12422600 | 12 | 54429385  | G | A | 0.6382 | 0.024   | 0.004  | 3.14E-09 |
| T2DM | rs11830241 | 12 | 132544643 | C | T | 0.9008 | -0.0411 | 0.0072 | 1.17E-08 |
| T2DM | rs314879   | 13 | 23309382  | C | T | 0.2288 | 0.0364  | 0.0046 | 2.84E-15 |
| T2DM | rs4397977  | 13 | 41688401  | G | A | 0.5764 | -0.0283 | 0.0042 | 1.07E-11 |

---



---

|      |             |    |           |   |   |        |         |        |          |
|------|-------------|----|-----------|---|---|--------|---------|--------|----------|
| T2DM | rs712315    | 14 | 35409701  | T | A | 0.783  | 0.0282  | 0.0051 | 3.90E-08 |
| T2DM | rs723355    | 14 | 47304091  | G | A | 0.5624 | 0.0237  | 0.0039 | 1.99E-09 |
| T2DM | rs12892257  | 14 | 58732748  | G | A | 0.4862 | 0.0288  | 0.005  | 1.03E-08 |
| T2DM | rs242105    | 14 | 69459229  | C | A | 0.4085 | 0.039   | 0.0059 | 3.58E-11 |
| T2DM | rs12586772  | 14 | 74932641  | T | A | 0.3963 | -0.0228 | 0.0039 | 6.41E-09 |
| T2DM | rs2056857   | 14 | 77300863  | C | T | 0.5888 | 0.0256  | 0.0039 | 5.16E-11 |
| T2DM | rs112324411 | 14 | 101258584 | C | T | 0.9377 | 0.0729  | 0.0103 | 1.42E-12 |
| T2DM | rs4906272   | 14 | 103376031 | C | T | 0.7332 | -0.0299 | 0.0046 | 5.21E-11 |
| T2DM | rs149336329 | 15 | 52587740  | G | T | 0.9566 | 0.0869  | 0.01   | 2.86E-18 |
| T2DM | rs9479      | 15 | 74328576  | G | A | 0.5244 | 0.0271  | 0.0037 | 4.00E-13 |
| T2DM | rs59646751  | 15 | 99276521  | G | T | 0.6929 | -0.0241 | 0.0041 | 3.36E-09 |
| T2DM | rs12918782  | 16 | 967241    | G | A | 0.2568 | 0.0308  | 0.0047 | 4.57E-11 |
| T2DM | rs9927842   | 16 | 15153717  | C | T | 0.7886 | -0.0307 | 0.005  | 6.97E-10 |
| T2DM | rs11646052  | 16 | 85716463  | G | A | 0.4116 | 0.026   | 0.0039 | 2.66E-11 |
| T2DM | rs11870735  | 17 | 481604    | C | T | 0.824  | -0.0314 | 0.0054 | 7.58E-09 |
| T2DM | rs366577    | 17 | 4854480   | C | T | 0.4942 | 0.0222  | 0.004  | 4.06E-08 |
| T2DM | rs9913225   | 17 | 27570622  | G | A | 0.3742 | 0.0262  | 0.004  | 5.42E-11 |
| T2DM | rs1109442   | 17 | 34862220  | C | T | 0.4629 | 0.0218  | 0.0037 | 6.11E-09 |
| T2DM | rs11078916  | 17 | 37746307  | C | T | 0.6474 | -0.0326 | 0.0042 | 1.24E-14 |
| T2DM | rs61736066  | 17 | 70645032  | G | A | 0.881  | 0.0421  | 0.0064 | 4.91E-11 |
| T2DM | rs7224711   | 17 | 76772288  | C | T | 0.5196 | 0.0307  | 0.0038 | 1.23E-15 |
| T2DM | rs303760    | 18 | 21083738  | C | T | 0.6887 | -0.0334 | 0.0044 | 2.04E-14 |
| T2DM | rs410150    | 18 | 40066006  | C | T | 0.2139 | 0.0289  | 0.0048 | 1.23E-09 |
| T2DM | rs6565922   | 18 | 74558999  | C | T | 0.5752 | -0.0279 | 0.0039 | 6.18E-13 |
| T2DM | rs10404726  | 19 | 18834514  | C | T | 0.4829 | 0.0255  | 0.0042 | 1.36E-09 |
| T2DM | rs2867570   | 19 | 31865946  | G | A | 0.5716 | 0.026   | 0.0039 | 2.13E-11 |

---

---

|      |            |    |           |   |   |        |         |        |          |
|------|------------|----|-----------|---|---|--------|---------|--------|----------|
| T2DM | rs17265513 | 20 | 39832628  | C | T | 0.189  | 0.0327  | 0.0055 | 2.98E-09 |
| T2DM | rs6073143  | 20 | 42230695  | C | T | 0.7327 | 0.0304  | 0.0044 | 4.40E-12 |
| T2DM | rs5762925  | 22 | 29369398  | C | A | 0.3776 | 0.0267  | 0.0039 | 7.74E-12 |
| T2DM | rs12746673 | 1  | 16050470  | C | A | 0.2076 | 0.0308  | 0.0049 | 3.30E-10 |
| T2DM | rs59020573 | 1  | 33196120  | G | A | 0.9075 | -0.0503 | 0.0088 | 1.32E-08 |
| T2DM | rs12116935 | 1  | 36789546  | G | A | 0.3536 | 0.0242  | 0.0043 | 1.52E-08 |
| T2DM | rs4658234  | 1  | 92048779  | G | T | 0.7716 | -0.0295 | 0.0051 | 9.11E-09 |
| T2DM | rs10159026 | 1  | 96404462  | C | T | 0.7491 | 0.0273  | 0.0046 | 2.04E-09 |
| T2DM | rs2816177  | 1  | 179248952 | G | A | 0.3994 | 0.0224  | 0.0039 | 6.82E-09 |
| T2DM | rs4129858  | 1  | 183004334 | G | A | 0.4167 | 0.0223  | 0.0038 | 4.38E-09 |
| T2DM | rs1327123  | 1  | 184014593 | G | C | 0.6447 | -0.0242 | 0.0039 | 6.77E-10 |
| T2DM | rs12128213 | 1  | 200197538 | G | A | 0.4713 | -0.0256 | 0.0042 | 1.50E-09 |
| T2DM | rs12041243 | 1  | 204490470 | G | A | 0.2426 | -0.0293 | 0.0047 | 3.26E-10 |
| T2DM | rs77424687 | 2  | 37204168  | C | T | 0.6959 | 0.0274  | 0.0046 | 2.90E-09 |
| T2DM | rs5010712  | 2  | 55157914  | G | A | 0.8124 | 0.03    | 0.0051 | 2.86E-09 |
| T2DM | rs4671799  | 2  | 67622243  | G | A | 0.6669 | -0.0262 | 0.004  | 5.29E-11 |
| T2DM | rs4832290  | 2  | 86707504  | C | T | 0.7645 | -0.0267 | 0.0049 | 3.94E-08 |
| T2DM | rs305686   | 2  | 163623932 | C | T | 0.6267 | 0.0294  | 0.0053 | 2.29E-08 |
| T2DM | rs6712905  | 2  | 196952010 | C | T | 0.3181 | 0.0279  | 0.0042 | 2.07E-11 |
| T2DM | rs4482463  | 2  | 205375909 | C | A | 0.2443 | 0.0316  | 0.0056 | 1.82E-08 |
| T2DM | rs1877712  | 2  | 219168432 | G | A | 0.4523 | 0.0211  | 0.0039 | 4.67E-08 |
| T2DM | rs9869477  | 3  | 28731810  | G | A | 0.562  | 0.0226  | 0.0038 | 4.12E-09 |
| T2DM | rs12494424 | 3  | 70520917  | G | C | 0.9582 | -0.0656 | 0.0117 | 2.34E-08 |
| T2DM | rs73146095 | 3  | 88130136  | C | T | 0.9016 | 0.0406  | 0.007  | 7.91E-09 |
| T2DM | rs978444   | 3  | 93981060  | G | T | 0.4136 | 0.0229  | 0.0039 | 3.52E-09 |
| T2DM | rs11929640 | 3  | 113288430 | G | A | 0.6454 | -0.0245 | 0.0042 | 8.51E-09 |

---

---

|      |             |   |           |   |   |        |         |        |          |
|------|-------------|---|-----------|---|---|--------|---------|--------|----------|
| T2DM | rs59489841  | 3 | 173710695 | C | T | 0.7015 | 0.0235  | 0.0042 | 3.15E-08 |
| T2DM | rs34617913  | 4 | 44503503  | G | A | 0.2966 | -0.0239 | 0.0043 | 2.90E-08 |
| T2DM | rs13107325  | 4 | 103188709 | C | T | 0.9265 | -0.0473 | 0.0086 | 3.27E-08 |
| T2DM | rs4833687   | 4 | 121765788 | C | T | 0.7415 | -0.0267 | 0.0045 | 2.76E-09 |
| T2DM | rs2952858   | 4 | 130786346 | G | A | 0.5987 | -0.0237 | 0.0041 | 1.12E-08 |
| T2DM | rs2125799   | 4 | 156697784 | C | T | 0.3305 | 0.0244  | 0.0041 | 3.57E-09 |
| T2DM | rs6897117   | 5 | 54986775  | C | T | 0.7055 | -0.0234 | 0.0042 | 1.95E-08 |
| T2DM | rs2662390   | 5 | 58132702  | C | T | 0.7419 | -0.0276 | 0.0048 | 1.03E-08 |
| T2DM | rs261967    | 5 | 95850250  | C | A | 0.414  | 0.0235  | 0.0038 | 8.05E-10 |
| T2DM | rs144052331 | 5 | 122650885 | C | T | 0.0539 | -0.0709 | 0.0098 | 3.97E-13 |
| T2DM | rs302395    | 5 | 151324600 | G | T | 0.3221 | 0.0232  | 0.0041 | 1.48E-08 |
| T2DM | rs2913873   | 5 | 170683134 | G | A | 0.1435 | -0.0316 | 0.0056 | 1.53E-08 |
| T2DM | rs6885157   | 5 | 180226516 | G | T | 0.7828 | 0.0372  | 0.0068 | 4.71E-08 |
| T2DM | rs9358912   | 6 | 26211146  | G | T | 0.6514 | 0.0249  | 0.0045 | 2.28E-08 |
| T2DM | rs9257408   | 6 | 28926220  | G | C | 0.4934 | -0.0314 | 0.0049 | 1.99E-10 |
| T2DM | rs2394186   | 6 | 29816421  | G | A | 0.2192 | -0.0271 | 0.0048 | 1.88E-08 |
| T2DM | rs33959228  | 6 | 35259397  | C | T | 0.9785 | 0.0915  | 0.0155 | 3.39E-09 |
| T2DM | rs72846863  | 6 | 36911274  | G | A | 0.8557 | 0.0335  | 0.0061 | 4.63E-08 |
| T2DM | rs2031847   | 6 | 41864441  | G | C | 0.9668 | -0.0752 | 0.0133 | 1.44E-08 |
| T2DM | rs538801    | 6 | 44875762  | T | A | 0.4302 | -0.0211 | 0.0039 | 4.72E-08 |
| T2DM | rs9370243   | 6 | 53789830  | G | T | 0.8339 | -0.0394 | 0.0061 | 1.03E-10 |
| T2DM | rs9449295   | 6 | 64163807  | C | T | 0.5169 | 0.0216  | 0.0039 | 4.03E-08 |
| T2DM | rs35164294  | 6 | 130265266 | G | T | 0.9288 | -0.0525 | 0.0092 | 1.35E-08 |
| T2DM | rs7742292   | 6 | 138864489 | C | T | 0.4778 | 0.0261  | 0.004  | 5.06E-11 |
| T2DM | rs6978327   | 7 | 36742886  | C | T | 0.4111 | -0.0233 | 0.004  | 4.79E-09 |
| T2DM | rs3735491   | 7 | 45116468  | C | A | 0.6921 | -0.025  | 0.0043 | 7.07E-09 |

---

---

|      |             |    |           |   |   |        |         |        |          |
|------|-------------|----|-----------|---|---|--------|---------|--------|----------|
| T2DM | rs6972291   | 7  | 55802063  | C | T | 0.3457 | 0.0283  | 0.0048 | 2.50E-09 |
| T2DM | rs12669521  | 7  | 77047102  | G | A | 0.2961 | -0.0263 | 0.0044 | 2.84E-09 |
| T2DM | rs3779272   | 7  | 77828991  | T | A | 0.5782 | 0.0213  | 0.0038 | 1.32E-08 |
| T2DM | rs73184014  | 7  | 104516274 | G | A | 0.2094 | -0.0298 | 0.0052 | 1.17E-08 |
| T2DM | rs12667919  | 7  | 131574608 | C | A | 0.7087 | -0.0256 | 0.0047 | 3.62E-08 |
| T2DM | rs4252505   | 7  | 142607301 | G | A | 0.1846 | 0.0413  | 0.007  | 4.52E-09 |
| T2DM | rs1922879   | 7  | 147658539 | G | A | 0.6293 | 0.023   | 0.0041 | 2.11E-08 |
| T2DM | rs243513    | 7  | 148429806 | G | A | 0.71   | 0.0232  | 0.0043 | 4.69E-08 |
| T2DM | rs11994255  | 8  | 28095939  | C | T | 0.7191 | -0.0239 | 0.0043 | 1.82E-08 |
| T2DM | rs12680217  | 8  | 37397803  | C | T | 0.301  | -0.0397 | 0.0071 | 2.45E-08 |
| T2DM | rs10101067  | 8  | 72407374  | G | C | 0.9141 | -0.0391 | 0.0069 | 1.28E-08 |
| T2DM | rs28792187  | 8  | 74568099  | G | A | 0.0729 | 0.0414  | 0.0076 | 4.13E-08 |
| T2DM | rs510062    | 8  | 97138738  | G | A | 0.4036 | -0.022  | 0.0039 | 1.23E-08 |
| T2DM | rs2679745   | 8  | 103876325 | G | A | 0.8139 | 0.0278  | 0.0049 | 1.90E-08 |
| T2DM | rs4294149   | 8  | 135775546 | C | T | 0.6027 | -0.0217 | 0.0039 | 2.28E-08 |
| T2DM | rs75619936  | 9  | 3249708   | G | C | 0.1329 | 0.0314  | 0.0056 | 2.42E-08 |
| T2DM | rs73642097  | 9  | 14141703  | G | A | 0.2052 | 0.0291  | 0.0049 | 2.10E-09 |
| T2DM | rs1570247   | 9  | 35749014  | G | A | 0.5982 | 0.0244  | 0.0039 | 2.91E-10 |
| T2DM | rs1885234   | 9  | 119252277 | G | T | 0.3946 | 0.0244  | 0.0039 | 2.68E-10 |
| T2DM | rs6597649   | 9  | 133786652 | C | T | 0.5196 | -0.0234 | 0.0039 | 2.29E-09 |
| T2DM | rs9411425   | 9  | 134868417 | G | T | 0.3531 | 0.0236  | 0.004  | 4.80E-09 |
| T2DM | rs3122231   | 10 | 44027356  | C | T | 0.6586 | 0.0271  | 0.0044 | 5.80E-10 |
| T2DM | rs146716733 | 10 | 63717113  | C | T | 0.9213 | 0.0451  | 0.0079 | 1.24E-08 |
| T2DM | rs111765639 | 10 | 64970928  | G | A | 0.876  | 0.0581  | 0.0084 | 5.37E-12 |
| T2DM | rs524903    | 10 | 100421841 | G | A | 0.8164 | 0.0428  | 0.0067 | 2.05E-10 |
| T2DM | rs620191    | 10 | 103065789 | G | T | 0.6635 | -0.0234 | 0.0041 | 1.73E-08 |

---

---

|      |            |    |           |   |   |        |         |        |          |
|------|------------|----|-----------|---|---|--------|---------|--------|----------|
| T2DM | rs10787518 | 10 | 115821878 | T | A | 0.4495 | 0.0292  | 0.0051 | 8.76E-09 |
| T2DM | rs7912336  | 10 | 118558736 | T | A | 0.5529 | 0.0217  | 0.0038 | 1.39E-08 |
| T2DM | rs705145   | 10 | 125226178 | C | A | 0.6475 | -0.0234 | 0.0039 | 3.33E-09 |
| T2DM | rs10766076 | 11 | 13340710  | T | A | 0.7137 | 0.026   | 0.0043 | 1.26E-09 |
| T2DM | rs16907058 | 11 | 20952237  | G | A | 0.941  | -0.0461 | 0.0084 | 4.55E-08 |
| T2DM | rs10767659 | 11 | 27686196  | G | T | 0.3538 | 0.026   | 0.0042 | 4.56E-10 |
| T2DM | rs10835690 | 11 | 30620262  | T | A | 0.822  | -0.029  | 0.0052 | 2.46E-08 |
| T2DM | rs7483027  | 11 | 58128015  | C | T | 0.3277 | -0.0267 | 0.0041 | 5.61E-11 |
| T2DM | rs11236524 | 11 | 75464344  | C | T | 0.2408 | 0.0363  | 0.0064 | 1.13E-08 |
| T2DM | rs7130522  | 11 | 95710493  | C | A | 0.3293 | 0.0222  | 0.0041 | 4.83E-08 |
| T2DM | rs529623   | 11 | 117693255 | C | T | 0.4961 | -0.0224 | 0.0038 | 4.26E-09 |
| T2DM | rs7127212  | 11 | 118953202 | C | T | 0.6067 | -0.0227 | 0.0041 | 2.36E-08 |
| T2DM | rs7134150  | 12 | 20591332  | G | A | 0.9011 | -0.0443 | 0.007  | 2.65E-10 |
| T2DM | rs2408252  | 12 | 45868623  | C | T | 0.5375 | -0.0264 | 0.0043 | 1.06E-09 |
| T2DM | rs2277339  | 12 | 57146069  | G | T | 0.1427 | 0.0437  | 0.0056 | 6.92E-15 |
| T2DM | rs11173646 | 12 | 61250814  | T | A | 0.7362 | -0.0285 | 0.0047 | 1.45E-09 |
| T2DM | rs11114650 | 12 | 81309262  | G | C | 0.7758 | -0.0447 | 0.0075 | 3.27E-09 |
| T2DM | rs12825669 | 12 | 106288445 | G | A | 0.6672 | 0.0226  | 0.0041 | 3.75E-08 |
| T2DM | rs884847   | 12 | 117723613 | G | A | 0.8026 | -0.0293 | 0.005  | 3.52E-09 |
| T2DM | rs6561273  | 13 | 46514492  | G | C | 0.3995 | -0.0303 | 0.0052 | 7.52E-09 |
| T2DM | rs9564268  | 13 | 66204880  | C | T | 0.544  | -0.0243 | 0.004  | 7.67E-10 |
| T2DM | rs61967710 | 13 | 97176585  | G | A | 0.9413 | -0.0554 | 0.0099 | 2.52E-08 |
| T2DM | rs9560114  | 13 | 112187882 | T | A | 0.2435 | -0.0259 | 0.0047 | 3.30E-08 |
| T2DM | rs12433335 | 14 | 30086481  | C | T | 0.568  | -0.0213 | 0.0038 | 1.58E-08 |
| T2DM | rs4902002  | 14 | 61229411  | G | A | 0.3474 | 0.0246  | 0.0041 | 1.37E-09 |
| T2DM | rs11848361 | 14 | 94039845  | G | A | 0.9213 | 0.0478  | 0.0085 | 2.15E-08 |

---

---

|      |             |    |           |   |   |        |         |        |          |
|------|-------------|----|-----------|---|---|--------|---------|--------|----------|
| T2DM | rs148106383 | 15 | 39712286  | C | T | 0.9747 | -0.0928 | 0.0156 | 2.71E-09 |
| T2DM | rs2447198   | 15 | 43895118  | C | T | 0.2235 | -0.034  | 0.0055 | 5.02E-10 |
| T2DM | rs7169799   | 15 | 49794020  | C | T | 0.4477 | 0.0213  | 0.0038 | 3.21E-08 |
| T2DM | rs11858759  | 15 | 58676821  | G | A | 0.7302 | 0.0236  | 0.0043 | 4.26E-08 |
| T2DM | rs1812707   | 15 | 84547222  | C | T | 0.4367 | -0.0227 | 0.0039 | 5.87E-09 |
| T2DM | rs4777857   | 15 | 93925327  | G | A | 0.4391 | 0.0255  | 0.0039 | 4.81E-11 |
| T2DM | rs111283203 | 16 | 56459589  | G | C | 0.7612 | -0.0257 | 0.0047 | 3.41E-08 |
| T2DM | rs4788815   | 16 | 71634811  | T | A | 0.6518 | 0.0231  | 0.004  | 7.34E-09 |
| T2DM | rs1075855   | 16 | 73098091  | G | C | 0.2791 | 0.0263  | 0.0045 | 3.53E-09 |
| T2DM | rs4384608   | 16 | 87856424  | C | T | 0.4076 | 0.0266  | 0.0043 | 4.36E-10 |
| T2DM | rs9937296   | 16 | 88554480  | C | T | 0.7708 | 0.0445  | 0.007  | 2.35E-10 |
| T2DM | rs117642733 | 17 | 21284910  | C | T | 0.9584 | -0.0762 | 0.0133 | 9.45E-09 |
| T2DM | rs372558    | 17 | 74418176  | G | C | 0.4202 | -0.0213 | 0.0039 | 4.51E-08 |
| T2DM | rs11150745  | 17 | 78757626  | G | A | 0.3173 | -0.0312 | 0.0053 | 5.17E-09 |
| T2DM | rs9958640   | 18 | 4845027   | G | A | 0.6007 | -0.0236 | 0.0042 | 2.28E-08 |
| T2DM | rs17747955  | 18 | 31582890  | C | T | 0.4496 | 0.0224  | 0.004  | 1.56E-08 |
| T2DM | rs2032217   | 18 | 63426979  | G | A | 0.6671 | -0.0268 | 0.004  | 2.70E-11 |
| T2DM | rs4807125   | 19 | 1646712   | C | T | 0.8476 | -0.0326 | 0.0059 | 2.59E-08 |
| T2DM | rs142385484 | 19 | 50016759  | C | T | 0.8518 | 0.0336  | 0.006  | 1.96E-08 |
| T2DM | rs6137042   | 20 | 2100095   | G | A | 0.697  | 0.0263  | 0.0047 | 2.33E-08 |
| T2DM | rs2240716   | 22 | 19969696  | C | T | 0.7069 | -0.0262 | 0.0042 | 4.83E-10 |
| T2DM | rs138771    | 22 | 35705359  | G | A | 0.6895 | -0.0259 | 0.0044 | 3.78E-09 |
| T2DM | rs61779284  | 1  | 39855177  | G | A | 0.7976 | -0.0703 | 0.0048 | 1.42E-48 |
| T2DM | rs79090772  | 1  | 51209148  | C | T | 0.0971 | -0.0728 | 0.0066 | 1.30E-28 |
| T2DM | rs1127215   | 1  | 117532790 | C | T | 0.6041 | 0.0412  | 0.0039 | 1.81E-26 |
| T2DM | rs2453051   | 1  | 120499573 | C | A | 0.1522 | 0.0609  | 0.0061 | 1.08E-23 |

---

---

|      |             |   |           |   |   |        |         |        |          |
|------|-------------|---|-----------|---|---|--------|---------|--------|----------|
| T2DM | rs145904381 | 1 | 151017991 | C | T | 0.0104 | -0.1607 | 0.0221 | 4.01E-13 |
| T2DM | rs1194592   | 1 | 154324384 | G | C | 0.4687 | -0.0242 | 0.0039 | 5.02E-10 |
| T2DM | rs539515    | 1 | 177889025 | C | A | 0.2066 | 0.0358  | 0.0046 | 5.40E-15 |
| T2DM | rs11240351  | 1 | 205044339 | G | A | 0.4696 | 0.0256  | 0.004  | 1.12E-10 |
| T2DM | rs61817176  | 1 | 206621028 | C | A | 0.4527 | -0.0263 | 0.004  | 3.59E-11 |
| T2DM | rs340874    | 1 | 214159256 | C | T | 0.4991 | 0.0543  | 0.0039 | 6.47E-45 |
| T2DM | rs2820446   | 1 | 219748818 | G | C | 0.2993 | -0.0407 | 0.0042 | 2.29E-22 |
| T2DM | rs348330    | 1 | 229672955 | G | A | 0.4544 | 0.0497  | 0.0054 | 2.81E-20 |
| T2DM | rs10737818  | 1 | 235542023 | G | A | 0.622  | 0.0352  | 0.0052 | 1.97E-11 |
| T2DM | rs10188334  | 2 | 653874    | C | T | 0.8409 | 0.0544  | 0.0053 | 2.47E-24 |
| T2DM | rs28758542  | 2 | 16238001  | G | A | 0.3408 | -0.0256 | 0.0042 | 1.67E-09 |
| T2DM | rs34845373  | 2 | 25635771  | G | A | 0.2557 | -0.0334 | 0.0048 | 5.26E-12 |
| T2DM | rs1260326   | 2 | 27730940  | C | T | 0.5805 | 0.0625  | 0.0039 | 2.16E-57 |
| T2DM | rs76675804  | 2 | 43611883  | C | T | 0.0941 | -0.1208 | 0.0074 | 1.29E-59 |
| T2DM | rs12986742  | 2 | 58975143  | C | T | 0.4727 | 0.0353  | 0.0038 | 5.53E-21 |
| T2DM | rs243018    | 2 | 60586707  | G | C | 0.5038 | 0.0508  | 0.0039 | 1.23E-39 |
| T2DM | rs2723065   | 2 | 65279414  | G | A | 0.3817 | -0.0422 | 0.0039 | 7.19E-28 |
| T2DM | rs113135335 | 2 | 111887754 | G | T | 0.1038 | -0.0533 | 0.0073 | 2.10E-13 |
| T2DM | rs9308614   | 2 | 121337196 | G | A | 0.1338 | -0.057  | 0.0058 | 4.51E-23 |
| T2DM | rs66877183  | 2 | 149428856 | T | A | 0.4255 | -0.0501 | 0.009  | 3.01E-08 |
| T2DM | rs6710938   | 2 | 161333872 | C | A | 0.228  | -0.0342 | 0.0046 | 1.64E-13 |
| T2DM | rs10184004  | 2 | 165508389 | C | T | 0.5951 | 0.0636  | 0.0041 | 4.39E-54 |
| T2DM | rs113414093 | 2 | 219859171 | G | A | 0.9459 | -0.0724 | 0.0128 | 1.68E-08 |
| T2DM | rs2943650   | 2 | 227105921 | C | T | 0.3616 | -0.0805 | 0.0042 | 1.90E-81 |
| T2DM | rs13415288  | 2 | 228971884 | C | T | 0.3654 | 0.0262  | 0.004  | 9.16E-11 |
| T2DM | rs838720    | 2 | 234303281 | G | C | 0.384  | 0.034   | 0.0039 | 4.31E-18 |

---

---

|      |            |   |           |   |   |        |         |        |           |
|------|------------|---|-----------|---|---|--------|---------|--------|-----------|
| T2DM | rs17036160 | 3 | 12329783  | C | T | 0.8874 | 0.1007  | 0.0065 | 1.54E-53  |
| T2DM | rs13094957 | 3 | 23457080  | C | T | 0.2196 | -0.0637 | 0.0047 | 2.35E-42  |
| T2DM | rs6792892  | 3 | 49995518  | C | T | 0.4822 | 0.0306  | 0.004  | 1.36E-14  |
| T2DM | rs62255926 | 3 | 53125429  | T | A | 0.2629 | -0.0252 | 0.0046 | 4.22E-08  |
| T2DM | rs76263492 | 3 | 54828827  | G | T | 0.9579 | -0.0675 | 0.0114 | 3.23E-09  |
| T2DM | rs13434089 | 3 | 63948566  | C | T | 0.2034 | -0.0607 | 0.0052 | 4.45E-31  |
| T2DM | rs66815886 | 3 | 64703394  | G | T | 0.6877 | 0.04    | 0.0042 | 1.03E-21  |
| T2DM | rs9814945  | 3 | 72803590  | C | T | 0.7128 | -0.0316 | 0.0048 | 3.30E-11  |
| T2DM | rs13059382 | 3 | 121961461 | G | T | 0.7216 | 0.0356  | 0.0059 | 1.40E-09  |
| T2DM | rs11708067 | 3 | 123065778 | G | A | 0.2229 | -0.0804 | 0.005  | 1.63E-57  |
| T2DM | rs9873519  | 3 | 124921457 | C | T | 0.5288 | -0.0373 | 0.0038 | 2.53E-22  |
| T2DM | rs2255703  | 3 | 129293256 | C | T | 0.404  | -0.0256 | 0.0039 | 3.70E-11  |
| T2DM | rs62271373 | 3 | 150066540 | T | A | 0.946  | -0.0645 | 0.0101 | 1.41E-10  |
| T2DM | rs7633673  | 3 | 152084243 | G | A | 0.5904 | 0.0306  | 0.0038 | 8.21E-16  |
| T2DM | rs13099581 | 3 | 168226052 | C | T | 0.8192 | 0.0371  | 0.0058 | 1.28E-10  |
| T2DM | rs8192675  | 3 | 170724883 | C | T | 0.3167 | -0.0452 | 0.0042 | 3.85E-27  |
| T2DM | rs2872246  | 3 | 183738460 | C | A | 0.5962 | -0.0266 | 0.004  | 2.56E-11  |
| T2DM | rs9859406  | 3 | 185534482 | G | A | 0.6476 | -0.1117 | 0.004  | 2.01E-169 |
| T2DM | rs6777684  | 3 | 187741842 | G | A | 0.6279 | 0.0548  | 0.0044 | 1.54E-35  |
| T2DM | rs73221116 | 4 | 720681    | G | A | 0.9577 | -0.0955 | 0.0106 | 2.06E-19  |
| T2DM | rs730831   | 4 | 1240299   | G | T | 0.1945 | -0.0878 | 0.0072 | 4.81E-34  |
| T2DM | rs56337234 | 4 | 1784403   | C | T | 0.4958 | 0.0426  | 0.0041 | 3.10E-25  |
| T2DM | rs362307   | 4 | 3241845   | C | T | 0.9265 | -0.048  | 0.0087 | 3.26E-08  |
| T2DM | rs10937721 | 4 | 6306763   | G | C | 0.3904 | -0.0755 | 0.0043 | 7.20E-70  |
| T2DM | rs2169033  | 4 | 18044357  | C | T | 0.34   | -0.0325 | 0.0041 | 1.42E-15  |
| T2DM | rs10938398 | 4 | 45186139  | G | A | 0.6065 | -0.0445 | 0.0039 | 1.49E-30  |

---



---

|      |             |   |           |   |   |        |         |        |           |
|------|-------------|---|-----------|---|---|--------|---------|--------|-----------|
| T2DM | rs1996617   | 4 | 52798624  | C | T | 0.3914 | 0.0289  | 0.004  | 6.54E-13  |
| T2DM | rs7674402   | 4 | 71835822  | G | A | 0.7719 | -0.0523 | 0.0064 | 3.98E-16  |
| T2DM | rs993380    | 4 | 83584496  | G | A | 0.6352 | -0.0272 | 0.0039 | 3.70E-12  |
| T2DM | rs117233795 | 4 | 85297954  | C | T | 0.9555 | 0.1426  | 0.0201 | 1.44E-12  |
| T2DM | rs9991328   | 4 | 89713121  | C | T | 0.4796 | -0.0227 | 0.0038 | 2.37E-09  |
| T2DM | rs28408270  | 4 | 95114572  | G | T | 0.4896 | 0.0239  | 0.0039 | 1.07E-09  |
| T2DM | rs7659468   | 4 | 103895317 | G | T | 0.4984 | -0.0287 | 0.0037 | 1.43E-14  |
| T2DM | rs6813195   | 4 | 153520475 | C | T | 0.6486 | 0.0463  | 0.004  | 7.65E-31  |
| T2DM | rs28819812  | 4 | 157652753 | C | A | 0.6586 | 0.033   | 0.0042 | 2.55E-15  |
| T2DM | rs55691245  | 4 | 185716100 | G | A | 0.8671 | 0.0561  | 0.0064 | 1.77E-18  |
| T2DM | rs4479849   | 5 | 44644006  | G | A | 0.5861 | -0.0258 | 0.0039 | 2.64E-11  |
| T2DM | rs12187734  | 5 | 51763665  | C | T | 0.5665 | 0.0287  | 0.0039 | 2.18E-13  |
| T2DM | rs4865796   | 5 | 53272664  | G | A | 0.2906 | -0.0481 | 0.0042 | 5.43E-30  |
| T2DM | rs464605    | 5 | 55807370  | C | T | 0.3465 | -0.07   | 0.0041 | 8.04E-66  |
| T2DM | rs4976033   | 5 | 67714246  | G | A | 0.4337 | 0.0251  | 0.0039 | 1.00E-10  |
| T2DM | rs34341     | 5 | 74934009  | T | A | 0.5248 | 0.0403  | 0.0039 | 4.93E-25  |
| T2DM | rs7732130   | 5 | 76435004  | G | A | 0.2954 | 0.0554  | 0.0047 | 2.21E-32  |
| T2DM | rs2591392   | 5 | 78546293  | G | A | 0.6247 | 0.0306  | 0.0039 | 1.89E-15  |
| T2DM | rs75432112  | 5 | 102586407 | G | A | 0.9536 | -0.1319 | 0.0104 | 6.41E-37  |
| T2DM | rs329118    | 5 | 133861663 | C | T | 0.5849 | -0.0281 | 0.0038 | 2.00E-13  |
| T2DM | rs1650505   | 5 | 158029734 | G | A | 0.7722 | -0.0409 | 0.0045 | 1.69E-19  |
| T2DM | rs4343858   | 5 | 176679407 | G | A | 0.7216 | 0.0295  | 0.0045 | 5.38E-11  |
| T2DM | rs9379084   | 6 | 7231843   | G | A | 0.843  | 0.0715  | 0.0062 | 5.31E-31  |
| T2DM | rs10440833  | 6 | 20688121  | T | A | 0.7028 | -0.1286 | 0.0041 | 1.00E-200 |
| T2DM | rs3130931   | 6 | 31134888  | C | T | 0.6765 | 0.0482  | 0.0041 | 2.34E-32  |
| T2DM | rs34247110  | 6 | 39282371  | G | A | 0.5159 | -0.0305 | 0.0038 | 2.07E-15  |

---

---

|      |             |   |           |   |   |        |         |        |          |
|------|-------------|---|-----------|---|---|--------|---------|--------|----------|
| T2DM | rs34298980  | 6 | 40409243  | C | T | 0.4713 | -0.0354 | 0.0055 | 1.17E-10 |
| T2DM | rs9472139   | 6 | 43813711  | G | C | 0.7397 | -0.0376 | 0.0044 | 1.44E-17 |
| T2DM | rs3798519   | 6 | 50788778  | C | A | 0.2086 | 0.0474  | 0.0047 | 5.60E-24 |
| T2DM | rs16881572  | 6 | 51413013  | G | A | 0.9448 | -0.0681 | 0.011  | 5.68E-10 |
| T2DM | rs7752666   | 6 | 107445266 | C | T | 0.7047 | 0.0305  | 0.0043 | 1.66E-12 |
| T2DM | rs80196932  | 6 | 117996631 | C | T | 0.1828 | -0.0479 | 0.0053 | 9.73E-20 |
| T2DM | rs11759026  | 6 | 126792095 | G | A | 0.3164 | 0.0585  | 0.0057 | 1.17E-24 |
| T2DM | rs2608953   | 6 | 131926334 | C | T | 0.7889 | -0.0348 | 0.005  | 3.33E-12 |
| T2DM | rs2876354   | 6 | 137295352 | C | T | 0.5168 | 0.0465  | 0.0038 | 1.43E-34 |
| T2DM | rs11155073  | 6 | 139837128 | C | T | 0.5159 | -0.0275 | 0.0039 | 1.41E-12 |
| T2DM | rs501470    | 6 | 160770918 | G | T | 0.4559 | -0.032  | 0.0038 | 1.62E-17 |
| T2DM | rs4709746   | 6 | 164133001 | C | T | 0.866  | 0.0565  | 0.0059 | 1.52E-21 |
| T2DM | rs10228796  | 7 | 15064190  | G | C | 0.5666 | 0.0672  | 0.0038 | 2.00E-71 |
| T2DM | rs2188848   | 7 | 23884697  | G | A | 0.2109 | -0.0325 | 0.0048 | 1.17E-11 |
| T2DM | rs860262    | 7 | 28194397  | C | A | 0.5683 | 0.0747  | 0.0039 | 2.92E-82 |
| T2DM | rs917195    | 7 | 30728452  | C | T | 0.7224 | 0.0424  | 0.0046 | 1.49E-20 |
| T2DM | rs730497    | 7 | 44223721  | G | A | 0.8275 | -0.0552 | 0.005  | 9.31E-29 |
| T2DM | rs6975279   | 7 | 69649683  | C | A | 0.7117 | -0.0431 | 0.0042 | 4.09E-25 |
| T2DM | rs187653072 | 7 | 102976385 | C | T | 0.0271 | 0.0967  | 0.0138 | 2.22E-12 |
| T2DM | rs6976111   | 7 | 117495667 | C | A | 0.7218 | -0.0258 | 0.0046 | 1.51E-08 |
| T2DM | rs3996350   | 7 | 130427057 | G | C | 0.5585 | 0.0347  | 0.0039 | 1.18E-18 |
| T2DM | rs60251368  | 7 | 140522073 | G | A | 0.0681 | 0.0549  | 0.0078 | 2.18E-12 |
| T2DM | rs62492368  | 7 | 150537635 | G | A | 0.5958 | -0.0311 | 0.0041 | 1.54E-14 |
| T2DM | rs6946660   | 7 | 156948648 | C | T | 0.4145 | -0.0472 | 0.0039 | 3.32E-33 |
| T2DM | rs60384372  | 8 | 9974584   | G | A | 0.4504 | -0.0352 | 0.0042 | 4.32E-17 |
| T2DM | rs10096633  | 8 | 19830921  | C | T | 0.8211 | 0.033   | 0.0054 | 8.08E-10 |

---

---

|      |            |    |           |   |   |        |         |        |           |
|------|------------|----|-----------|---|---|--------|---------|--------|-----------|
| T2DM | rs2725370  | 8  | 30852826  | C | T | 0.7126 | -0.0319 | 0.0046 | 3.30E-12  |
| T2DM | rs13365225 | 8  | 36858483  | G | A | 0.2605 | 0.0327  | 0.0046 | 1.55E-12  |
| T2DM | rs13262861 | 8  | 41508577  | C | A | 0.8326 | 0.1021  | 0.0054 | 8.20E-79  |
| T2DM | rs10808671 | 8  | 95967372  | G | A | 0.5407 | -0.0358 | 0.0038 | 2.37E-21  |
| T2DM | rs13266634 | 8  | 118184783 | C | T | 0.6814 | 0.1024  | 0.0041 | 4.23E-136 |
| T2DM | rs17772814 | 8  | 128711742 | G | A | 0.917  | 0.0685  | 0.0124 | 3.38E-08  |
| T2DM | rs1561927  | 8  | 129568078 | C | T | 0.31   | 0.0332  | 0.0046 | 4.97E-13  |
| T2DM | rs13268508 | 8  | 145525277 | C | T | 0.6277 | -0.0376 | 0.0041 | 4.07E-20  |
| T2DM | rs4237150  | 9  | 4290085   | G | C | 0.5708 | -0.0433 | 0.0037 | 6.98E-31  |
| T2DM | rs10758950 | 9  | 8290816   | T | A | 0.7077 | -0.026  | 0.0045 | 6.98E-09  |
| T2DM | rs12380322 | 9  | 19074538  | G | A | 0.3922 | 0.0295  | 0.004  | 1.64E-13  |
| T2DM | rs2150999  | 9  | 20790622  | C | T | 0.5367 | 0.0243  | 0.0039 | 5.54E-10  |
| T2DM | rs10811661 | 9  | 22134094  | C | T | 0.2442 | -0.1471 | 0.0048 | 1.00E-200 |
| T2DM | rs1412234  | 9  | 28410683  | C | T | 0.2864 | 0.0397  | 0.0042 | 4.42E-21  |
| T2DM | rs12001437 | 9  | 34074476  | C | T | 0.4071 | 0.0301  | 0.0038 | 4.38E-15  |
| T2DM | rs67269808 | 9  | 81907986  | G | A | 0.0722 | -0.0731 | 0.0078 | 1.03E-20  |
| T2DM | rs2796441  | 9  | 84308948  | G | A | 0.5596 | 0.0609  | 0.0039 | 2.92E-55  |
| T2DM | rs10993072 | 9  | 96915002  | C | T | 0.6647 | -0.0315 | 0.0041 | 2.93E-14  |
| T2DM | rs529565   | 9  | 136149500 | C | T | 0.3648 | 0.0415  | 0.0039 | 8.04E-27  |
| T2DM | rs28642213 | 9  | 139248082 | G | A | 0.7572 | 0.0822  | 0.0047 | 5.71E-68  |
| T2DM | rs11257655 | 10 | 12307894  | C | T | 0.7044 | -0.0946 | 0.0056 | 1.44E-63  |
| T2DM | rs10998338 | 10 | 70382179  | G | A | 0.5189 | -0.0308 | 0.0039 | 1.31E-15  |
| T2DM | rs2633311  | 10 | 75598099  | C | T | 0.4972 | 0.0237  | 0.004  | 3.12E-09  |
| T2DM | rs3012060  | 10 | 77244336  | T | A | 0.1852 | 0.0342  | 0.0055 | 5.94E-10  |
| T2DM | rs697239   | 10 | 80947438  | C | T | 0.4453 | -0.0587 | 0.0038 | 4.77E-54  |
| T2DM | rs36062478 | 10 | 89722731  | C | T | 0.178  | 0.0389  | 0.0054 | 6.78E-13  |

---

---

|      |             |    |           |   |   |        |         |        |           |
|------|-------------|----|-----------|---|---|--------|---------|--------|-----------|
| T2DM | rs1111875   | 10 | 94462882  | C | T | 0.549  | 0.0928  | 0.0038 | 1.44E-128 |
| T2DM | rs1408579   | 10 | 101912194 | C | T | 0.5591 | 0.0275  | 0.0042 | 6.11E-11  |
| T2DM | rs35011184  | 10 | 114749734 | G | A | 0.7797 | -0.2508 | 0.005  | 1.00E-200 |
| T2DM | rs11199116  | 10 | 121660400 | C | A | 0.1909 | 0.0306  | 0.005  | 1.01E-09  |
| T2DM | rs7071036   | 10 | 122930568 | C | T | 0.1978 | -0.051  | 0.0073 | 2.00E-12  |
| T2DM | rs2280141   | 10 | 124193181 | G | T | 0.512  | -0.0455 | 0.0048 | 6.04E-21  |
| T2DM | rs4929965   | 11 | 2197286   | G | A | 0.6147 | -0.0676 | 0.0042 | 5.07E-57  |
| T2DM | rs2237897   | 11 | 2858546   | C | T | 0.7624 | 0.2199  | 0.0068 | 1.00E-200 |
| T2DM | rs117316450 | 11 | 14518419  | G | C | 0.0183 | 0.1328  | 0.0171 | 9.46E-15  |
| T2DM | rs757110    | 11 | 17418477  | C | A | 0.3704 | 0.0599  | 0.0039 | 4.59E-52  |
| T2DM | rs62618693  | 11 | 32956492  | C | T | 0.9582 | 0.0819  | 0.0111 | 1.41E-13  |
| T2DM | rs2956092   | 11 | 34908780  | C | T | 0.6526 | -0.0254 | 0.004  | 1.68E-10  |
| T2DM | rs58090211  | 11 | 35433712  | C | A | 0.8433 | 0.0539  | 0.0091 | 3.06E-09  |
| T2DM | rs35251247  | 11 | 43878459  | G | A | 0.7065 | -0.0309 | 0.0042 | 1.74E-13  |
| T2DM | rs12419690  | 11 | 45858584  | G | A | 0.5115 | 0.0298  | 0.004  | 1.39E-13  |
| T2DM | rs149027146 | 11 | 48489360  | T | A | 0.0602 | 0.0738  | 0.0104 | 1.58E-12  |
| T2DM | rs12789028  | 11 | 65326154  | G | A | 0.8198 | -0.0459 | 0.005  | 3.90E-20  |
| T2DM | rs10750840  | 11 | 68835182  | T | A | 0.5524 | -0.0239 | 0.0039 | 5.01E-10  |
| T2DM | rs3918298   | 11 | 69463273  | G | A | 0.8823 | 0.1038  | 0.0101 | 7.95E-25  |
| T2DM | rs11602873  | 11 | 72460762  | T | A | 0.1459 | -0.0987 | 0.0059 | 1.98E-62  |
| T2DM | rs10830963  | 11 | 92708710  | G | C | 0.3057 | 0.0731  | 0.0042 | 1.29E-66  |
| T2DM | rs10750397  | 11 | 128234144 | G | A | 0.7146 | -0.04   | 0.0042 | 1.74E-21  |
| T2DM | rs76895963  | 12 | 4384844   | G | T | 0.019  | -0.4223 | 0.0202 | 1.20E-96  |
| T2DM | rs2066827   | 12 | 12871099  | G | T | 0.289  | 0.0321  | 0.0051 | 2.22E-10  |
| T2DM | rs11048457  | 12 | 26463174  | G | A | 0.3857 | 0.0385  | 0.0043 | 2.20E-19  |
| T2DM | rs3751239   | 12 | 27963676  | G | C | 0.2193 | -0.0687 | 0.0047 | 1.95E-47  |

---

---

|      |            |    |           |   |   |        |         |        |          |
|------|------------|----|-----------|---|---|--------|---------|--------|----------|
| T2DM | rs2257883  | 12 | 66216162  | G | A | 0.7363 | -0.071  | 0.0049 | 3.86E-47 |
| T2DM | rs10879261 | 12 | 71520761  | G | T | 0.388  | 0.0341  | 0.0038 | 6.81E-19 |
| T2DM | rs11108094 | 12 | 95928113  | C | A | 0.9339 | -0.0571 | 0.0088 | 1.08E-10 |
| T2DM | rs6538805  | 12 | 97849120  | C | T | 0.4736 | -0.0303 | 0.0039 | 1.45E-14 |
| T2DM | rs1426371  | 12 | 108629780 | G | A | 0.692  | 0.0429  | 0.0045 | 1.29E-21 |
| T2DM | rs79310463 | 12 | 118406696 | C | T | 0.8257 | -0.05   | 0.0053 | 7.21E-21 |
| T2DM | rs56348580 | 12 | 121432117 | G | C | 0.7058 | 0.0507  | 0.0047 | 1.48E-27 |
| T2DM | rs10773000 | 12 | 123736084 | G | T | 0.672  | 0.034   | 0.0041 | 5.58E-17 |
| T2DM | rs4930726  | 12 | 124428331 | C | T | 0.334  | -0.0353 | 0.0041 | 7.53E-18 |
| T2DM | rs11614914 | 12 | 133070294 | C | T | 0.7033 | -0.0394 | 0.0044 | 2.64E-19 |
| T2DM | rs34584161 | 13 | 26776999  | G | A | 0.2837 | -0.0565 | 0.0044 | 1.62E-37 |
| T2DM | rs57286125 | 13 | 33557644  | G | C | 0.8324 | -0.0609 | 0.0051 | 1.83E-33 |
| T2DM | rs9316500  | 13 | 51094114  | G | T | 0.3528 | -0.0401 | 0.0041 | 1.03E-22 |
| T2DM | rs7991679  | 13 | 58691107  | T | A | 0.7562 | 0.0274  | 0.0048 | 1.12E-08 |
| T2DM | rs11616380 | 13 | 80705315  | G | T | 0.7299 | 0.0764  | 0.0043 | 1.02E-69 |
| T2DM | rs9515905  | 13 | 91949562  | G | A | 0.2606 | -0.0472 | 0.0044 | 2.06E-27 |
| T2DM | rs9587811  | 13 | 109946882 | C | A | 0.5464 | 0.0248  | 0.0038 | 4.91E-11 |
| T2DM | rs12883788 | 14 | 33303540  | C | T | 0.5887 | -0.0327 | 0.004  | 2.82E-16 |
| T2DM | rs7147483  | 14 | 38804675  | C | T | 0.3364 | -0.0352 | 0.0041 | 9.41E-18 |
| T2DM | rs7156625  | 14 | 79942647  | G | A | 0.7662 | -0.053  | 0.0049 | 5.35E-27 |
| T2DM | rs8010382  | 14 | 91963722  | G | A | 0.4692 | 0.0266  | 0.0038 | 3.02E-12 |
| T2DM | rs56365443 | 14 | 103960026 | G | A | 0.3202 | -0.0238 | 0.0042 | 1.82E-08 |
| T2DM | rs8043085  | 15 | 38828140  | G | T | 0.6975 | -0.0407 | 0.0042 | 9.06E-22 |
| T2DM | rs4923864  | 15 | 40634717  | G | A | 0.6905 | 0.0568  | 0.0061 | 1.69E-20 |
| T2DM | rs2289739  | 15 | 41801512  | G | T | 0.6873 | -0.0364 | 0.0055 | 4.35E-11 |
| T2DM | rs7163757  | 15 | 62391608  | C | T | 0.5556 | 0.043   | 0.0038 | 6.08E-30 |

---

---

|      |            |    |          |   |   |        |         |        |           |
|------|------------|----|----------|---|---|--------|---------|--------|-----------|
| T2DM | rs7178762  | 15 | 63871292 | C | T | 0.4889 | 0.0323  | 0.0041 | 1.79E-15  |
| T2DM | rs4776970  | 15 | 68080886 | T | A | 0.4472 | -0.0287 | 0.004  | 1.05E-12  |
| T2DM | rs6495182  | 15 | 75814388 | C | T | 0.6845 | 0.0405  | 0.0042 | 2.10E-22  |
| T2DM | rs12910361 | 15 | 77782335 | G | A | 0.614  | 0.0686  | 0.004  | 5.19E-65  |
| T2DM | rs893617   | 15 | 90381278 | C | T | 0.2813 | 0.0537  | 0.0041 | 2.13E-38  |
| T2DM | rs2290203  | 15 | 91512067 | G | A | 0.6998 | -0.0506 | 0.0043 | 2.33E-31  |
| T2DM | rs55857387 | 16 | 300388   | C | T | 0.2537 | -0.0441 | 0.0046 | 1.74E-21  |
| T2DM | rs8061528  | 16 | 3656482  | C | T | 0.7573 | -0.0346 | 0.0045 | 2.56E-14  |
| T2DM | rs8056890  | 16 | 28897452 | G | A | 0.6775 | -0.0295 | 0.0042 | 1.54E-12  |
| T2DM | rs8054556  | 16 | 29958216 | G | A | 0.5699 | -0.0317 | 0.0039 | 1.85E-16  |
| T2DM | rs1421085  | 16 | 53800954 | C | T | 0.367  | 0.1182  | 0.004  | 1.29E-189 |
| T2DM | rs2216063  | 16 | 54387084 | G | A | 0.1982 | -0.0296 | 0.0054 | 3.47E-08  |
| T2DM | rs244415   | 16 | 69666683 | G | A | 0.6296 | 0.0401  | 0.0041 | 2.00E-22  |
| T2DM | rs72802365 | 16 | 75246035 | G | C | 0.928  | 0.1074  | 0.008  | 1.10E-40  |
| T2DM | rs56823429 | 16 | 81533789 | C | A | 0.2685 | 0.0418  | 0.0045 | 3.33E-20  |
| T2DM | rs8071043  | 17 | 3988451  | C | T | 0.3318 | 0.0465  | 0.0041 | 5.35E-30  |
| T2DM | rs73239895 | 17 | 6953558  | C | T | 0.914  | -0.0869 | 0.011  | 3.02E-15  |
| T2DM | rs858519   | 17 | 7531965  | C | T | 0.5049 | -0.024  | 0.004  | 1.28E-09  |
| T2DM | rs17810376 | 17 | 9787845  | G | A | 0.2974 | 0.0279  | 0.0047 | 2.84E-09  |
| T2DM | rs2297508  | 17 | 17715317 | G | C | 0.5583 | -0.0305 | 0.004  | 2.39E-14  |
| T2DM | rs2040792  | 17 | 29628549 | C | A | 0.461  | 0.031   | 0.0039 | 1.99E-15  |
| T2DM | rs11651755 | 17 | 36099840 | C | T | 0.4671 | 0.0663  | 0.0038 | 8.61E-67  |
| T2DM | rs676387   | 17 | 40706273 | C | A | 0.6806 | -0.0416 | 0.0041 | 3.32E-24  |
| T2DM | rs3744347  | 17 | 46178674 | G | A | 0.253  | -0.0301 | 0.0046 | 4.76E-11  |
| T2DM | rs35895680 | 17 | 47060322 | C | A | 0.7066 | 0.0499  | 0.0047 | 8.41E-27  |
| T2DM | rs4335     | 17 | 61565025 | G | A | 0.4783 | 0.0304  | 0.0038 | 1.06E-15  |

---

---

|      |            |    |          |   |   |        |         |        |          |
|------|------------|----|----------|---|---|--------|---------|--------|----------|
| T2DM | rs57767539 | 17 | 62203059 | G | A | 0.9362 | -0.0622 | 0.0091 | 7.24E-12 |
| T2DM | rs12603589 | 17 | 65825248 | C | T | 0.3128 | 0.0421  | 0.0046 | 1.06E-19 |
| T2DM | rs7240767  | 18 | 7070642  | C | T | 0.4776 | 0.034   | 0.0051 | 2.05E-11 |
| T2DM | rs7227272  | 18 | 36746623 | G | A | 0.8229 | 0.0408  | 0.0056 | 4.69E-13 |
| T2DM | rs10048404 | 18 | 54578482 | C | T | 0.6597 | 0.0313  | 0.0054 | 6.12E-09 |
| T2DM | rs9319943  | 18 | 56879827 | C | T | 0.2071 | -0.0308 | 0.0048 | 1.50E-10 |
| T2DM | rs6567160  | 18 | 57829135 | C | T | 0.2362 | 0.0539  | 0.0044 | 7.51E-34 |
| T2DM | rs12454712 | 18 | 60845884 | C | T | 0.4059 | -0.0424 | 0.0039 | 2.42E-27 |
| T2DM | rs12185519 | 19 | 4967739  | C | T | 0.8081 | -0.036  | 0.0054 | 2.54E-11 |
| T2DM | rs75253922 | 19 | 7240848  | C | T | 0.1846 | 0.0402  | 0.0054 | 7.72E-14 |
| T2DM | rs2115107  | 19 | 7968168  | G | A | 0.5948 | -0.0357 | 0.0039 | 2.26E-20 |
| T2DM | rs7246440  | 19 | 12505873 | G | A | 0.6201 | 0.0299  | 0.0043 | 3.72E-12 |
| T2DM | rs9384     | 19 | 13010643 | G | T | 0.6566 | 0.0404  | 0.0041 | 8.36E-23 |
| T2DM | rs58542926 | 19 | 19379549 | C | T | 0.9258 | -0.0721 | 0.0072 | 1.62E-23 |
| T2DM | rs4805881  | 19 | 33896432 | C | A | 0.6207 | -0.0379 | 0.0039 | 8.44E-22 |
| T2DM | rs429358   | 19 | 45411941 | C | T | 0.1469 | -0.0585 | 0.0055 | 1.90E-26 |
| T2DM | rs8107527  | 19 | 46158417 | G | A | 0.6245 | -0.0542 | 0.004  | 4.23E-41 |
| T2DM | rs10408163 | 19 | 47597102 | C | T | 0.6016 | 0.0319  | 0.0043 | 1.07E-13 |
| T2DM | rs7274134  | 20 | 22428284 | C | T | 0.6695 | 0.0247  | 0.0041 | 2.28E-09 |
| T2DM | rs6059662  | 20 | 32675727 | G | A | 0.6963 | 0.0369  | 0.0043 | 2.07E-17 |
| T2DM | rs12625671 | 20 | 42994812 | C | T | 0.2326 | 0.0603  | 0.0055 | 6.08E-28 |
| T2DM | rs6066138  | 20 | 45594711 | G | A | 0.7376 | 0.042   | 0.0047 | 6.30E-19 |
| T2DM | rs6021276  | 20 | 50155386 | C | T | 0.6262 | -0.0283 | 0.004  | 2.24E-12 |
| T2DM | rs4809906  | 20 | 51033681 | G | A | 0.6206 | 0.0345  | 0.004  | 5.07E-18 |
| T2DM | rs2252115  | 20 | 51620857 | G | A | 0.4284 | -0.0237 | 0.0039 | 1.29E-09 |
| T2DM | rs4810145  | 20 | 57396495 | C | T | 0.5221 | 0.0303  | 0.0038 | 1.05E-15 |

---

---

|      |            |    |          |   |   |        |         |        |          |
|------|------------|----|----------|---|---|--------|---------|--------|----------|
| T2DM | rs6011155  | 20 | 62450664 | C | T | 0.4137 | -0.0284 | 0.0039 | 5.85E-13 |
| T2DM | rs56392746 | 22 | 30451688 | G | A | 0.9169 | 0.0579  | 0.0076 | 3.45E-14 |
| T2DM | rs75307421 | 22 | 32203334 | G | A | 0.9687 | -0.0737 | 0.0132 | 2.60E-08 |
| T2DM | rs11913442 | 22 | 41593581 | C | T | 0.3799 | -0.0245 | 0.004  | 8.22E-10 |
| T2DM | rs3747207  | 22 | 44324855 | G | A | 0.7178 | -0.0412 | 0.0044 | 3.69E-21 |
| T2DM | rs1801645  | 22 | 50356850 | C | T | 0.2778 | 0.0374  | 0.0045 | 4.18E-17 |

---

Chr, chromosome; SNP; single nucleotide polymorphism.



**Supplementary table 3 Genetic variants associated with BMI, leptin, incretin lipids, liver enzymes and pancreatic enzymes**

Supplementary table 3 can be obtained in OSF data respiratory:

[https://osf.io/cmjus/?view\\_only=2d73c0a09b97443db3909fbb2a37c0f7](https://osf.io/cmjus/?view_only=2d73c0a09b97443db3909fbb2a37c0f7)

Please view the file by clicking the xlsx file.

Files 

Click on a storage provider or drag and drop to upload

 Filter 

| Name   | Modified   |
|--------------------------------------------------------------------------------------------------------------------------------------------------------------------------|--------------------------------------------------------------------------------------------------------------------------------------------------------------------------------|
|  Risk assessment for gastrointestinal diseases vi...                                    |                                                                                                                                                                                |
| -  OSF Storage (United States)                                                          |                                                                                                                                                                                |
|  Supplementary table 3.xlsx                                                             | 2023-11-15 07:11 PM                                                                                                                                                            |

**Supplementary table 4 Missing rate (%) of covariables**

| <b>Covariables</b>         | <b>Number</b> | <b>Rate (%)</b> |
|----------------------------|---------------|-----------------|
| Sex                        | 0             | 0               |
| Age                        | 0             | 0               |
| Townsend deprivation index | 459           | 0.12            |
| Education                  | 7544          | 2.02            |
| Ethnicity                  | 627           | 0.17            |
| Smoking                    | 623           | 0.17            |
| Drinking                   | 627           | 0.17            |
| Physical activity          | 7826          | 2.09            |
| Healthy diet               | 5053          | 1.35            |
| Body mass index            | 2149          | 0.57            |
| C-reactive protein         | 25161         | 6.73            |
| INFLA-score                | 34715         | 9.28            |
| Proton-pump inhibitor      | 0             | 0               |
| Metabolic abnormalities    | 1323          | 0.35            |

**Supplementary table 5 ORs and CIs for the association between the PRS of type 2 diabetes and gastrointestinal diseases.**

| <b>Diseases</b>                 |                           | <b>Minimally adjusted model<br/>OR (95% CI)</b> | <b>P-value</b> | <b>Fully adjusted model<br/>OR (95% CI)</b> | <b>P-value</b> |
|---------------------------------|---------------------------|-------------------------------------------------|----------------|---------------------------------------------|----------------|
| Barrett's esophagus             | Low genetic risk          | Ref                                             |                | Ref                                         |                |
|                                 | Intermediate genetic risk | 0.94 (0.85, 1.04)                               | 0.208          | 0.93 (0.85, 1.03)                           | 0.176          |
|                                 | High genetic risk         | 0.99 (0.88, 1.11)                               | 0.830          | 0.98 (0.87, 1.10)                           | 0.697          |
| Gastroesophageal reflux disease | Low genetic risk          | Ref                                             |                | Ref                                         |                |
|                                 | Intermediate genetic risk | 1.04 (1.00, 1.07)                               | 0.053          | 1.03 (0.99, 1.06)                           | 0.148          |
|                                 | High genetic risk         | 1.05 (1.01, 1.10)                               | 0.026*         | 1.03 (0.99, 1.08)                           | 0.170          |
| Gastritis and duodenitis        | Low genetic risk          | Ref                                             |                | Ref                                         |                |
|                                 | Intermediate genetic risk | 1.04 (1.00, 1.08)                               | 0.044*         | 1.04 (1.00, 1.08)                           | 0.070          |
|                                 | High genetic risk         | 1.09 (1.04, 1.14)                               | <0.001**       | 1.08 (1.03, 1.13)                           | 0.001**        |
| Celiac disease                  | Low genetic risk          | Ref                                             |                | Ref                                         |                |
|                                 | Intermediate genetic risk | 1.04 (0.87, 1.23)                               | 0.676          | 1.05 (0.89, 1.25)                           | 0.562          |
|                                 | High genetic risk         | 1.19 (0.97, 1.45)                               | 0.099          | 1.22 (1.00, 1.49)                           | 0.054          |
| Peptic ulcer                    | Low genetic risk          | Ref                                             |                | Ref                                         |                |
|                                 | Intermediate genetic risk | 1.08 (0.99, 1.17)                               | 0.067          | 1.07 (0.99, 1.16)                           | 0.108          |
|                                 | High genetic risk         | 1.10 (0.99, 1.21)                               | 0.065          | 1.07 (0.97, 1.18)                           | 0.153          |
| Crohn's disease                 | Low genetic risk          | Ref                                             |                | Ref                                         |                |

|                                   |                           |                   |          |                   |          |
|-----------------------------------|---------------------------|-------------------|----------|-------------------|----------|
| Ulcerative colitis                | Intermediate genetic risk | 1.10 (0.88, 1.36) | 0.405    | 1.09 (0.88, 1.35) | 0.430    |
|                                   | High genetic risk         | 1.09 (0.84, 1.41) | 0.508    | 1.08 (0.83, 1.40) | 0.557    |
|                                   | Low genetic risk          | Ref               |          | Ref               |          |
| Irritable bowel syndrome          | Intermediate genetic risk | 0.98 (0.85, 1.13) | 0.796    | 0.98 (0.85, 1.13) | 0.773    |
|                                   | High genetic risk         | 0.92 (0.76, 1.10) | 0.348    | 0.91 (0.76, 1.10) | 0.328    |
|                                   | Low genetic risk          | Ref               |          | Ref               |          |
| Diverticulum                      | Intermediate genetic risk | 1.04 (0.96, 1.12) | 0.319    | 1.04 (0.96, 1.12) | 0.329    |
|                                   | High genetic risk         | 1.04 (0.94, 1.14) | 0.441    | 1.04 (0.94, 1.14) | 0.473    |
|                                   | Low genetic risk          | Ref               |          | Ref               |          |
| Pancreatitis                      | Intermediate genetic risk | 1.05 (1.01, 1.08) | 0.006*   | 1.04 (1.00, 1.07) | 0.024*   |
|                                   | High genetic risk         | 1.03 (0.99, 1.07) | 0.133    | 1.01 (0.97, 1.05) | 0.516    |
|                                   | Low genetic risk          | Ref               |          | Ref               |          |
| Non-alcoholic fatty liver disease | Intermediate genetic risk | 1.11 (0.96, 1.28) | 0.174    | 1.09 (0.94, 1.26) | 0.258    |
|                                   | High genetic risk         | 1.09 (0.91, 1.30) | 0.354    | 1.05 (0.88, 1.25) | 0.608    |
|                                   | Low genetic risk          | Ref               |          | Ref               |          |
| Liver cirrhosis                   | Intermediate genetic risk | 1.17 (1.06, 1.29) | 0.003**  | 1.13 (1.02, 1.25) | 0.018*   |
|                                   | High genetic risk         | 1.51 (1.35, 1.70) | <0.001** | 1.42 (1.26, 1.59) | <0.001** |
|                                   | Low genetic risk          | Ref               |          | Ref               |          |
|                                   | Intermediate genetic risk | 1.12 (0.98, 1.29) | 0.101    | 1.10 (0.96, 1.26) | 0.159    |
|                                   | High genetic risk         | 1.16 (0.99, 1.37) | 0.073    | 1.12 (0.95, 1.32) | 0.174    |
|                                   | Low genetic risk          | Ref               |          | Ref               |          |

|                                     |                           |                   |          |                   |  |        |
|-------------------------------------|---------------------------|-------------------|----------|-------------------|--|--------|
| Biliary disease                     |                           |                   |          |                   |  |        |
|                                     | Low genetic risk          | Ref               |          | Ref               |  |        |
|                                     | Intermediate genetic risk | 1.07 (1.01, 1.13) | 0.016*   | 1.05 (0.99, 1.10) |  | 0.106  |
|                                     | High genetic risk         | 1.13 (1.06, 1.20) | <0.001** | 1.08 (1.01, 1.15) |  | 0.022* |
| Gastrointestinal tract cancers      |                           |                   |          |                   |  |        |
|                                     | Low genetic risk          | Ref               |          | Ref               |  |        |
|                                     | Intermediate genetic risk | 0.99 (0.93, 1.07) | 0.877    | 0.99 (0.92, 1.06) |  | 0.762  |
|                                     | High genetic risk         | 1.00 (0.92, 1.09) | 0.943    | 0.99 (0.91, 1.08) |  | 0.852  |
| Hepatobiliary and pancreatic cancer |                           |                   |          |                   |  |        |
|                                     | Low genetic risk          | Ref               |          | Ref               |  |        |
|                                     | Intermediate genetic risk | 1.20 (1.04, 1.39) | 0.011    | 1.19 (1.03, 1.38) |  | 0.016  |
|                                     | High genetic risk         | 1.20 (1.01, 1.42) | 0.039    | 1.17 (0.99, 1.39) |  | 0.069  |

Minimally adjusted model: logistic models adjusted for age, sex, Townsend deprivation index, education. Fully adjusted model: logistic models adjusted for age, sex, Townsend deprivation index, education, body mass index, smoking status, drinking status, physical activity, and adherence to a healthy diet.

The low genetic risk group was the reference group. PRS, polygenetic risk score.

P<0.05/15 after Bonferroni correction was considered significant. \* Indicated the P value<0.05 and >0.05/15 and \*\* indicated the P value<0.05/15.

**Supplementary table 6 ORs and CIs for the association between the PRS of type 2 diabetes and gastrointestinal diseases stratified by status of baseline type 2 diabetes.**

| Diseases                        |                           | Participants without type 2 diabetes |         | Participants with type 2 diabetes |         |
|---------------------------------|---------------------------|--------------------------------------|---------|-----------------------------------|---------|
|                                 |                           | OR (95% CI)                          | P-value | OR (95% CI)                       | P-value |
| Barrett's esophagus             | Low genetic risk          | Ref                                  |         | Ref                               |         |
|                                 | Intermediate genetic risk | 0.92 (0.83, 1.02)                    | 0.104   | 1.15 (0.65, 2.00)                 | 0.634   |
|                                 | High genetic risk         | 0.96 (0.85, 1.09)                    | 0.540   | 1.04 (0.59, 1.85)                 | 0.889   |
| Gastroesophageal reflux disease | Low genetic risk          | Ref                                  |         | Ref                               |         |
|                                 | Intermediate genetic risk | 1.03 (0.99, 1.07)                    | 0.130   | 0.99 (0.79, 1.24)                 | 0.914   |
|                                 | High genetic risk         | 1.03 (0.98, 1.07)                    | 0.269   | 1.04 (0.82, 1.31)                 | 0.764   |
| Gastritis and duodenitis        | Low genetic risk          | Ref                                  |         | Ref                               |         |
|                                 | Intermediate genetic risk | 1.02 (0.98, 1.06)                    | 0.286   | 1.04 (0.84, 1.29)                 | 0.712   |
|                                 | High genetic risk         | 1.05 (1.00, 1.10)                    | 0.066   | 0.96 (0.78, 1.20)                 | 0.733   |
| Celiac disease                  | Low genetic risk          | Ref                                  |         | Ref                               |         |
|                                 | Intermediate genetic risk | 1.06 (0.89, 1.26)                    | 0.517   | 0.61 (0.23, 1.62)                 | 0.322   |
|                                 | High genetic risk         | 1.23 (1.00, 1.52)                    | 0.047*  | 0.58 (0.21, 1.57)                 | 0.284   |
| Peptic ulcer                    | Low genetic risk          | Ref                                  |         | Ref                               |         |
|                                 | Intermediate genetic risk | 1.06 (0.98, 1.16)                    | 0.147   | 0.81 (0.57, 1.14)                 | 0.227   |
|                                 | High genetic risk         | 1.06 (0.96, 1.18)                    | 0.258   | 0.69 (0.48, 0.99)                 | 0.041*  |
| Crohn's disease                 | Low genetic risk          | Ref                                  |         | Ref                               |         |
|                                 | Intermediate genetic risk | 1.08 (0.87, 1.34)                    | 0.496   | 1.48 (0.35, 6.31)                 | 0.600   |
|                                 | High genetic risk         | 1.04 (0.79, 1.36)                    | 0.797   | 1.67 (0.39, 7.24)                 | 0.492   |
| Ulcerative colitis              | Low genetic risk          | Ref                                  |         | Ref                               |         |
|                                 | Intermediate genetic risk | 0.96 (0.83, 1.11)                    | 0.605   | 1.94 (0.60, 6.26)                 | 0.270   |
|                                 | High genetic risk         | 0.91 (0.75, 1.10)                    | 0.320   | 1.49 (0.45, 4.95)                 | 0.516   |

|                                      |                           |                   |         |                   |        |
|--------------------------------------|---------------------------|-------------------|---------|-------------------|--------|
| Irritable bowel syndrome             | Low genetic risk          | Ref               |         | Ref               |        |
|                                      | Intermediate genetic risk | 1.04 (0.96, 1.12) | 0.374   | 1.27 (0.68, 2.38) | 0.460  |
|                                      | High genetic risk         | 1.03 (0.93, 1.14) | 0.547   | 1.25 (0.66, 2.37) | 0.486  |
| Diverticulum                         | Low genetic risk          | Ref               |         | Ref               |        |
|                                      | Intermediate genetic risk | 1.04 (1.00, 1.07) | 0.040*  | 0.95 (0.79, 1.15) | 0.607  |
|                                      | High genetic risk         | 1.00 (0.96, 1.04) | 0.877   | 0.93 (0.76, 1.12) | 0.435  |
| Pancreatitis                         | Low genetic risk          | Ref               |         | Ref               |        |
|                                      | Intermediate genetic risk | 1.07 (0.93, 1.25) | 0.346   | 0.99 (0.51, 1.93) | 0.981  |
|                                      | High genetic risk         | 0.97 (0.80, 1.17) | 0.721   | 1.06 (0.54, 2.08) | 0.871  |
| Non-alcoholic fatty liver disease    | Low genetic risk          | Ref               |         | Ref               |        |
|                                      | Intermediate genetic risk | 1.09 (0.98, 1.21) | 0.123   | 0.89 (0.64, 1.24) | 0.501  |
|                                      | High genetic risk         | 1.23 (1.08, 1.40) | 0.002** | 0.98 (0.70, 1.37) | 0.910  |
| Liver cirrhosis                      | Low genetic risk          | Ref               |         | Ref               |        |
|                                      | Intermediate genetic risk | 1.08 (0.93, 1.25) | 0.302   | 0.70 (0.47, 1.04) | 0.079  |
|                                      | High genetic risk         | 0.98 (0.81, 1.18) | 0.822   | 0.63 (0.42, 0.95) | 0.027* |
| Biliary disease                      | Low genetic risk          | Ref               |         | Ref               |        |
|                                      | Intermediate genetic risk | 1.04 (0.99, 1.10) | 0.118   | 0.86 (0.66, 1.13) | 0.286  |
|                                      | High genetic risk         | 1.08 (1.01, 1.15) | 0.029*  | 0.79 (0.60, 1.05) | 0.104  |
| Gastrointestinal tract cancers       | Low genetic risk          | Ref               |         | Ref               |        |
|                                      | Intermediate genetic risk | 0.98 (0.92, 1.06) | 0.645   | 0.87 (0.61, 1.23) | 0.420  |
|                                      | High genetic risk         | 0.98 (0.90, 1.07) | 0.695   | 0.77 (0.54, 1.09) | 0.142  |
| Hepatobiliary and pancreatic cancers | Low genetic risk          | Ref               |         | Ref               |        |
|                                      | Intermediate genetic risk | 1.13 (0.98, 1.31) | 0.101   | 1.29 (0.72, 2.30) | 0.388  |
|                                      | High genetic risk         | 1.01 (0.84, 1.22) | 0.893   | 1.17 (0.65, 2.12) | 0.596  |

OR and 95% CI was calculated by logistic models adjusted for age, sex, Townsend deprivation index, education, body mass index, smoking status, drinking status, physical activity, and adherence to a healthy diet.

The low genetic risk group was the reference group. PRS, polygenetic risk score.

$P < 0.05/15$  after Bonferroni correction was considered significant. \* Indicated the  $P$  value  $< 0.05$  and  $> 0.05/15$  and \*\* indicated the  $P$  value  $< 0.05/15$ .



Supplementary table 7 ORs and CIs for the association between PRS of different traits and gastrointestinal diseases.

|                                        |                                  | Minimally adjusted model |              | Fully adjusted model |              | Minimally adjusted model |       | Fully adjusted model |       |
|----------------------------------------|----------------------------------|--------------------------|--------------|----------------------|--------------|--------------------------|-------|----------------------|-------|
|                                        |                                  | OR (95% CI)              | P            | OR (95% CI)          | P            | OR (95% CI)              | P     | OR (95% CI)          | P     |
|                                        |                                  | <b>Obesity</b>           |              |                      |              | <b>Leptin</b>            |       |                      |       |
|                                        |                                  | <b>BMI</b>               |              |                      |              | <b>Leptin</b>            |       |                      |       |
| <b>Barretts esophagus</b>              | <b>Intermediate genetic risk</b> | 1.02 (0.93, 1.12)        | 0.631        | 1.02 (0.93, 1.12)    | 0.625        | 1.03 (0.94, 1.13)        | 0.465 | 1.03 (0.94, 1.13)    | 0.503 |
|                                        | <b>High genetic risk</b>         | 1.16 (1.03, 1.29)        | <b>0.010</b> | 1.16 (1.04, 1.29)    | <b>0.010</b> | 0.96 (0.85, 1.07)        | 0.453 | 0.95 (0.85, 1.07)    | 0.401 |
| <b>Gastroesophageal reflux disease</b> | <b>Intermediate genetic risk</b> | 1.00 (0.97, 1.04)        | 0.842        | 1.00 (0.97, 1.04)    | 0.807        | 1.01 (0.97, 1.04)        | 0.668 | 1.00 (0.97, 1.03)    | 0.999 |
|                                        | <b>High genetic risk</b>         | 1.01 (0.97, 1.06)        | 0.495        | 1.01 (0.97, 1.06)    | 0.498        | 1.01 (0.97, 1.05)        | 0.586 | 0.99 (0.95, 1.03)    | 0.756 |
| <b>Gastritis and duodenitis</b>        | <b>Intermediate genetic risk</b> | 0.99 (0.95, 1.02)        | 0.403        | 0.99 (0.95, 1.02)    | 0.416        | 1.03 (1.00, 1.07)        | 0.079 | 1.03 (0.99, 1.07)    | 0.106 |
|                                        | <b>High genetic risk</b>         | 0.96 (0.92, 1.00)        | <b>0.041</b> | 0.96 (0.92, 1.00)    | <b>0.037</b> | 1.01 (0.97, 1.06)        | 0.569 | 1.01 (0.96, 1.05)    | 0.765 |
| <b>Celiac disease</b>                  | <b>Intermediate genetic risk</b> | 1.03 (0.88, 1.21)        | 0.683        | 1.04 (0.89, 1.21)    | 0.660        | 0.98 (0.84, 1.14)        | 0.770 | 0.99 (0.85, 1.15)    | 0.890 |
|                                        | <b>High genetic risk</b>         | 1.03 (0.85, 1.24)        | 0.767        | 1.03 (0.85, 1.25)    | 0.733        | 0.91 (0.75, 1.10)        | 0.336 | 0.94 (0.77, 1.13)    | 0.501 |
| <b>Peptic ulcer</b>                    | <b>Intermediate genetic risk</b> | 1.00 (0.93, 1.07)        | 0.949        | 1.00 (0.93, 1.07)    | 0.931        | 0.98 (0.91, 1.05)        | 0.490 | 0.97 (0.90, 1.04)    | 0.387 |
|                                        | <b>High genetic risk</b>         | 1.08 (0.99, 1.18)        | 0.076        | 1.08 (0.99, 1.17)    | 0.092        | 1.00 (0.92, 1.10)        | 0.919 | 0.99 (0.91, 1.08)    | 0.829 |
| <b>Crohn's disease</b>                 | <b>Intermediate genetic risk</b> | 0.96 (0.79, 1.16)        | 0.665        | 0.96 (0.79, 1.16)    | 0.659        | 1.15 (0.94, 1.39)        | 0.173 | 1.14 (0.94, 1.39)    | 0.182 |
|                                        | <b>High genetic risk</b>         | 1.09 (0.87, 1.37)        | 0.468        | 1.08 (0.86, 1.36)    | 0.490        | 0.98 (0.76, 1.25)        | 0.851 | 0.97 (0.76, 1.24)    | 0.825 |
| <b>Ulcerative colitis</b>              | <b>Intermediate genetic risk</b> | 0.94 (0.82, 1.07)        | 0.329        | 0.93 (0.82, 1.07)    | 0.315        | 1.11 (0.96, 1.27)        | 0.149 | 1.11 (0.97, 1.27)    | 0.144 |
|                                        | <b>High genetic risk</b>         | 0.98 (0.84, 1.16)        | 0.834        | 0.98 (0.83, 1.15)    | 0.784        | 0.98 (0.82, 1.16)        | 0.801 | 0.98 (0.83, 1.17)    | 0.858 |
| <b>Irritable bowel syndrome</b>        | <b>Intermediate genetic risk</b> | 1.02 (0.95, 1.09)        | 0.641        | 1.02 (0.95, 1.09)    | 0.636        | 1.00 (0.93, 1.07)        | 0.975 | 1.00 (0.93, 1.07)    | 0.977 |
|                                        | <b>High genetic risk</b>         | 1.01 (0.93, 1.11)        | 0.763        | 1.01 (0.93, 1.10)    | 0.782        | 0.96 (0.88, 1.05)        | 0.399 | 0.96 (0.88, 1.05)    | 0.398 |
| <b>Diverticular disease</b>            | <b>Intermediate genetic risk</b> | 1.04 (1.01, 1.07)        | <b>0.020</b> | 1.04 (1.00, 1.07)    | <b>0.024</b> | 1.02 (0.99, 1.06)        | 0.116 | 1.02 (0.99, 1.05)    | 0.246 |
|                                        | <b>High genetic risk</b>         | 1.05 (1.01, 1.09)        | <b>0.009</b> | 1.05 (1.01, 1.09)    | <b>0.014</b> | 1.01 (0.97, 1.05)        | 0.698 | 0.99 (0.96, 1.03)    | 0.774 |
| <b>Pancreatitis</b>                    | <b>Intermediate genetic risk</b> | 1.25 (1.09, 1.44)        | <b>0.001</b> | 1.26 (1.09, 1.44)    | <b>0.001</b> | 0.95 (0.84, 1.08)        | 0.425 | 0.93 (0.82, 1.06)    | 0.296 |

|                                             |                                  |                    |              |                   |              |                   |              |                   |              |
|---------------------------------------------|----------------------------------|--------------------|--------------|-------------------|--------------|-------------------|--------------|-------------------|--------------|
|                                             | <b>High genetic risk</b>         | 1.32 (1.12, 1.55)  | <b>0.001</b> | 1.32 (1.12, 1.56) | <b>0.001</b> | 0.90 (0.77, 1.06) | 0.198        | 0.87 (0.74, 1.02) | 0.079        |
| <b>Non-alcoholic fatty liver disease</b>    | <b>Intermediate genetic risk</b> | 1.11 (1.02, 1.21)  | <b>0.020</b> | 1.11 (1.02, 1.21) | <b>0.018</b> | 0.92 (0.85, 1.00) | <b>0.042</b> | 0.88 (0.81, 0.96) | <b>0.003</b> |
|                                             | <b>High genetic risk</b>         | 1.19 (1.07, 1.32)  | <b>0.001</b> | 1.19 (1.07, 1.32) | <b>0.001</b> | 0.86 (0.78, 0.96) | <b>0.005</b> | 0.79 (0.71, 0.87) | <b>0.000</b> |
| <b>Liver cirrhosis</b>                      | <b>Intermediate genetic risk</b> | 1.13 (1.00, 1.28)  | 0.053        | 1.13 (1.00, 1.28) | 0.054        | 1.09 (0.97, 1.23) | 0.165        | 1.07 (0.95, 1.21) | 0.246        |
|                                             | <b>High genetic risk</b>         | 1.19 (1.03, 1.38)  | <b>0.021</b> | 1.19 (1.02, 1.38) | <b>0.024</b> | 0.96 (0.83, 1.12) | 0.616        | 0.94 (0.80, 1.09) | 0.385        |
| <b>Biliary disease</b>                      | <b>Intermediate genetic risk</b> | 1.11 (1.05, 1.16)  | <b>0.000</b> | 1.11 (1.06, 1.17) | <b>0.000</b> | 1.00 (0.95, 1.05) | 0.942        | 0.98 (0.93, 1.02) | 0.335        |
|                                             | <b>High genetic risk</b>         | 1.18 (1.11, 1.26)  | <b>0.000</b> | 1.19 (1.12, 1.26) | <b>0.000</b> | 0.99 (0.93, 1.05) | 0.639        | 0.93 (0.88, 0.99) | <b>0.025</b> |
| <b>Gastrointestinal tract cancers</b>       | <b>Intermediate genetic risk</b> | 1.03 (0.96, 1.10)  | 0.402        | 1.01 (0.95, 1.08) | 0.737        | 0.98 (0.92, 1.05) | 0.552        | 0.98 (0.92, 1.04) | 0.489        |
|                                             | <b>High genetic risk</b>         | 1.05 (0.97, 1.13)  | 0.270        | 1.01 (0.93, 1.09) | 0.834        | 0.98 (0.90, 1.06) | 0.570        | 0.97 (0.90, 1.05) | 0.486        |
| <b>Hepatobiliary and pancreatic cancers</b> | <b>Intermediate genetic risk</b> | 1.18 (1.03, 1.34)  | <b>0.016</b> | 1.14 (1.00, 1.30) | <b>0.050</b> | 0.96 (0.85, 1.08) | 0.501        | 0.95 (0.84, 1.08) | 0.425        |
|                                             | <b>High genetic risk</b>         | 1.22 (1.04, 1.42)  | <b>0.015</b> | 1.14 (0.97, 1.33) | 0.106        | 0.93 (0.79, 1.08) | 0.324        | 0.91 (0.78, 1.06) | 0.229        |
|                                             |                                  | <b>Incretin</b>    |              |                   |              | <b>GLP1_2h</b>    |              |                   |              |
|                                             |                                  | <b>FastingGLP1</b> |              |                   |              |                   |              |                   |              |
| <b>Barretts esophagus</b>                   | <b>Intermediate genetic risk</b> | /                  | /            | /                 | /            | /                 | /            | /                 | /            |
|                                             | <b>High genetic risk</b>         | 1.29 (0.99, 1.67)  | 0.058        | 1.28 (0.99, 1.67) | 0.061        | 1.00 (0.91, 1.11) | 0.961        | 1.00 (0.91, 1.10) | 0.972        |
| <b>Gastroesophageal reflux disease</b>      | <b>Intermediate genetic risk</b> | /                  | /            | /                 | /            | /                 | /            | /                 | /            |
|                                             | <b>High genetic risk</b>         | 0.96 (0.87, 1.07)  | 0.490        | 0.96 (0.86, 1.07) | 0.477        | 1.04 (1.00, 1.07) | <b>0.036</b> | 1.04 (1.00, 1.08) | <b>0.032</b> |
| <b>Gastritis and duodenitis</b>             | <b>Intermediate genetic risk</b> | /                  | /            | /                 | /            | /                 | /            | /                 | /            |
|                                             | <b>High genetic risk</b>         | 0.95 (0.85, 1.06)  | 0.377        | 0.95 (0.85, 1.06) | 0.354        | 0.96 (0.92, 0.99) | <b>0.018</b> | 0.96 (0.92, 0.99) | <b>0.020</b> |
| <b>Celiac disease</b>                       | <b>Intermediate genetic risk</b> | /                  | /            | /                 | /            | /                 | /            | /                 | /            |
|                                             | <b>High genetic risk</b>         | 0.69 (0.38, 1.24)  | 0.215        | 0.68 (0.38, 1.24) | 0.209        | 0.96 (0.81, 1.14) | 0.665        | 0.96 (0.81, 1.14) | 0.655        |
| <b>Peptic ulcer</b>                         | <b>Intermediate genetic risk</b> | /                  | /            | /                 | /            | /                 | /            | /                 | /            |
|                                             | <b>High genetic risk</b>         | 0.86 (0.67, 1.10)  | 0.220        | 0.85 (0.66, 1.09) | 0.206        | 0.90 (0.83, 0.97) | <b>0.009</b> | 0.90 (0.83, 0.97) | <b>0.009</b> |
| <b>Crohn's disease</b>                      | <b>Intermediate genetic risk</b> | /                  | /            | /                 | /            | /                 | /            | /                 | /            |
|                                             | <b>High genetic risk</b>         | 0.98 (0.52, 1.83)  | 0.948        | 0.97 (0.52, 1.82) | 0.936        | 1.15 (0.94, 1.40) | 0.175        | 1.15 (0.94, 1.40) | 0.179        |

|                                             |                                  |                   |              |                   |              |                   |       |                   |       |
|---------------------------------------------|----------------------------------|-------------------|--------------|-------------------|--------------|-------------------|-------|-------------------|-------|
| <b>Ulcerative colitis</b>                   | <b>Intermediate genetic risk</b> | /                 | /            | /                 | /            | /                 | /     | /                 | /     |
|                                             | <b>High genetic risk</b>         | 0.67 (0.40, 1.14) | 0.140        | 0.67 (0.39, 1.13) | 0.134        | 1.01 (0.87, 1.16) | 0.943 | 1.00 (0.87, 1.16) | 0.960 |
| <b>Irritable bowel syndrome</b>             | <b>Intermediate genetic risk</b> | /                 | /            | /                 | /            | /                 | /     | /                 | /     |
|                                             | <b>High genetic risk</b>         | 0.97 (0.77, 1.22) | 0.779        | 0.97 (0.77, 1.22) | 0.775        | 0.97 (0.90, 1.05) | 0.486 | 0.97 (0.90, 1.05) | 0.491 |
| <b>Diverticular disease</b>                 | <b>Intermediate genetic risk</b> | /                 | /            | /                 | /            | /                 | /     | /                 | /     |
|                                             | <b>High genetic risk</b>         | 0.92 (0.84, 1.02) | 0.119        | 0.92 (0.83, 1.02) | 0.111        | 1.03 (1.00, 1.06) | 0.088 | 1.03 (0.99, 1.06) | 0.107 |
| <b>Pancreatitis</b>                         | <b>Intermediate genetic risk</b> | /                 | /            | /                 | /            | /                 | /     | /                 | /     |
|                                             | <b>High genetic risk</b>         | 0.84 (0.53, 1.32) | 0.441        | 0.83 (0.53, 1.31) | 0.422        | 0.91 (0.79, 1.05) | 0.186 | 0.91 (0.79, 1.05) | 0.189 |
| <b>Non-alcoholic fatty liver disease</b>    | <b>Intermediate genetic risk</b> | /                 | /            | /                 | /            | /                 | /     | /                 | /     |
|                                             | <b>High genetic risk</b>         | 1.00 (0.76, 1.31) | 0.983        | 0.98 (0.74, 1.29) | 0.872        | 0.92 (0.84, 1.01) | 0.076 | 0.92 (0.84, 1.01) | 0.085 |
| <b>Liver cirrhosis</b>                      | <b>Intermediate genetic risk</b> | /                 | /            | /                 | /            | /                 | /     | /                 | /     |
|                                             | <b>High genetic risk</b>         | 1.08 (0.74, 1.58) | 0.675        | 1.07 (0.74, 1.56) | 0.720        | 1.04 (0.92, 1.19) | 0.498 | 1.04 (0.92, 1.18) | 0.519 |
| <b>Biliary disease</b>                      | <b>Intermediate genetic risk</b> | /                 | /            | /                 | /            | /                 | /     | /                 | /     |
|                                             | <b>High genetic risk</b>         | 0.86 (0.73, 1.02) | 0.081        | 0.86 (0.73, 1.01) | 0.070        | 1.05 (0.99, 1.10) | 0.082 | 1.05 (1.00, 1.10) | 0.069 |
| <b>Gastrointestinal tract cancers</b>       | <b>Intermediate genetic risk</b> | /                 | /            | /                 | /            | /                 | /     | /                 | /     |
|                                             | <b>High genetic risk</b>         | 1.18 (0.97, 1.43) | 0.090        | 1.18 (0.97, 1.43) | 0.095        | 1.06 (0.99, 1.13) | 0.112 | 1.06 (0.99, 1.13) | 0.120 |
| <b>Hepatobiliary and pancreatic cancers</b> | <b>Intermediate genetic risk</b> | /                 | /            | /                 | /            | /                 | /     | /                 | /     |
|                                             | <b>High genetic risk</b>         | 0.96 (0.64, 1.46) | 0.859        | 0.96 (0.64, 1.45) | 0.847        | 0.91 (0.79, 1.04) | 0.177 | 0.91 (0.79, 1.04) | 0.170 |
| <b>Incretin</b>                             |                                  |                   |              |                   |              |                   |       |                   |       |
| <b>Fasting GIP</b>                          |                                  |                   |              |                   | <b>GIP2h</b> |                   |       |                   |       |
| <b>Barretts esophagus</b>                   | <b>Intermediate genetic risk</b> | 1.05 (0.97, 1.13) | 0.237        | 1.05 (0.97, 1.13) | 0.254        | 1.03 (0.94, 1.13) | 0.521 | 1.03 (0.94, 1.13) | 0.536 |
|                                             | <b>High genetic risk</b>         | 1.20 (1.04, 1.38) | <b>0.014</b> | 1.19 (1.03, 1.37) | <b>0.017</b> | 1.07 (0.96, 1.19) | 0.242 | 1.07 (0.96, 1.19) | 0.245 |
| <b>Gastroesophageal reflux disease</b>      | <b>Intermediate genetic risk</b> | 1.01 (0.98, 1.04) | 0.441        | 1.01 (0.98, 1.03) | 0.702        | 1.02 (0.99, 1.05) | 0.213 | 1.02 (0.99, 1.05) | 0.277 |
|                                             | <b>High genetic risk</b>         | 1.00 (0.94, 1.05) | 0.886        | 0.99 (0.94, 1.04) | 0.671        | 1.01 (0.97, 1.05) | 0.615 | 1.01 (0.97, 1.05) | 0.793 |
| <b>Gastritis and duodenitis</b>             | <b>Intermediate genetic risk</b> | 1.03 (1.00, 1.06) | 0.063        | 1.03 (1.00, 1.06) | 0.080        | 1.03 (0.99, 1.06) | 0.102 | 1.03 (0.99, 1.06) | 0.121 |

|                                             |                                  |                   |              |                   |              |                   |              |                   |              |
|---------------------------------------------|----------------------------------|-------------------|--------------|-------------------|--------------|-------------------|--------------|-------------------|--------------|
|                                             | <b>High genetic risk</b>         | 1.06 (1.00, 1.12) | 0.052        | 1.05 (1.00, 1.11) | 0.067        | 1.03 (0.98, 1.07) | 0.239        | 1.02 (0.98, 1.07) | 0.267        |
| <b>Celiac disease</b>                       | <b>Intermediate genetic risk</b> | 1.03 (0.90, 1.17) | 0.691        | 1.04 (0.91, 1.18) | 0.604        | 1.03 (0.88, 1.20) | 0.726        | 1.03 (0.88, 1.20) | 0.696        |
|                                             | <b>High genetic risk</b>         | 1.13 (0.88, 1.44) | 0.343        | 1.14 (0.89, 1.45) | 0.306        | 1.05 (0.87, 1.27) | 0.610        | 1.06 (0.88, 1.28) | 0.555        |
| <b>Peptic ulcer</b>                         | <b>Intermediate genetic risk</b> | 1.08 (1.01, 1.15) | <b>0.016</b> | 1.07 (1.01, 1.14) | <b>0.021</b> | 1.08 (1.00, 1.16) | <b>0.046</b> | 1.07 (1.00, 1.15) | 0.054        |
|                                             | <b>High genetic risk</b>         | 1.14 (1.02, 1.28) | <b>0.023</b> | 1.13 (1.01, 1.27) | <b>0.032</b> | 1.05 (0.96, 1.14) | 0.296        | 1.05 (0.96, 1.14) | 0.323        |
| <b>Crohn's disease</b>                      | <b>Intermediate genetic risk</b> | 1.12 (0.95, 1.32) | 0.178        | 1.12 (0.95, 1.32) | 0.183        | 1.14 (0.94, 1.39) | 0.190        | 1.14 (0.94, 1.39) | 0.192        |
|                                             | <b>High genetic risk</b>         | 1.21 (0.89, 1.64) | 0.225        | 1.20 (0.88, 1.63) | 0.241        | 1.23 (0.97, 1.55) | 0.089        | 1.23 (0.97, 1.56) | 0.087        |
| <b>Ulcerative colitis</b>                   | <b>Intermediate genetic risk</b> | 1.04 (0.92, 1.16) | 0.541        | 1.04 (0.93, 1.16) | 0.522        | 0.93 (0.81, 1.06) | 0.257        | 0.93 (0.81, 1.06) | 0.259        |
|                                             | <b>High genetic risk</b>         | 1.07 (0.86, 1.33) | 0.564        | 1.06 (0.85, 1.32) | 0.590        | 0.97 (0.82, 1.13) | 0.666        | 0.97 (0.83, 1.14) | 0.713        |
| <b>Irritable bowel syndrome</b>             | <b>Intermediate genetic risk</b> | 1.04 (0.97, 1.10) | 0.262        | 1.03 (0.97, 1.10) | 0.263        | 1.07 (0.99, 1.15) | 0.072        | 1.07 (0.99, 1.15) | 0.073        |
|                                             | <b>High genetic risk</b>         | 1.08 (0.96, 1.21) | 0.200        | 1.08 (0.96, 1.21) | 0.198        | 1.07 (0.98, 1.16) | 0.154        | 1.07 (0.98, 1.16) | 0.154        |
| <b>Diverticular disease</b>                 | <b>Intermediate genetic risk</b> | 1.02 (1.00, 1.05) | 0.109        | 1.02 (0.99, 1.04) | 0.204        | 1.03 (1.00, 1.06) | <b>0.043</b> | 1.03 (1.00, 1.06) | 0.055        |
|                                             | <b>High genetic risk</b>         | 1.05 (1.00, 1.10) | 0.055        | 1.04 (0.99, 1.09) | 0.143        | 1.05 (1.02, 1.09) | <b>0.004</b> | 1.05 (1.02, 1.09) | <b>0.005</b> |
| <b>Pancreatitis</b>                         | <b>Intermediate genetic risk</b> | 1.02 (0.91, 1.14) | 0.732        | 1.01 (0.90, 1.12) | 0.897        | 1.00 (0.88, 1.14) | 0.968        | 1.00 (0.88, 1.13) | 0.953        |
|                                             | <b>High genetic risk</b>         | 1.24 (1.02, 1.51) | <b>0.032</b> | 1.22 (1.00, 1.48) | 0.052        | 1.01 (0.86, 1.18) | 0.912        | 1.00 (0.85, 1.17) | 0.980        |
| <b>Non-alcoholic fatty liver disease</b>    | <b>Intermediate genetic risk</b> | 1.07 (0.99, 1.15) | 0.071        | 1.04 (0.97, 1.12) | 0.284        | 0.94 (0.86, 1.02) | 0.115        | 0.92 (0.85, 1.00) | 0.064        |
|                                             | <b>High genetic risk</b>         | 0.91 (0.78, 1.05) | 0.209        | 0.87 (0.75, 1.01) | 0.069        | 0.87 (0.79, 0.97) | <b>0.009</b> | 0.85 (0.77, 0.94) | <b>0.002</b> |
| <b>Liver cirrhosis</b>                      | <b>Intermediate genetic risk</b> | 1.02 (0.92, 1.13) | 0.669        | 1.01 (0.92, 1.12) | 0.782        | 0.95 (0.85, 1.07) | 0.431        | 0.95 (0.84, 1.07) | 0.390        |
|                                             | <b>High genetic risk</b>         | 1.09 (0.90, 1.32) | 0.385        | 1.07 (0.88, 1.29) | 0.514        | 0.98 (0.85, 1.13) | 0.769        | 0.97 (0.84, 1.13) | 0.729        |
| <b>Biliary disease</b>                      | <b>Intermediate genetic risk</b> | 1.06 (1.02, 1.11) | <b>0.003</b> | 1.05 (1.00, 1.09) | <b>0.036</b> | 1.01 (0.96, 1.06) | 0.729        | 1.00 (0.95, 1.05) | 0.967        |
|                                             | <b>High genetic risk</b>         | 1.10 (1.02, 1.19) | <b>0.014</b> | 1.08 (1.00, 1.16) | 0.063        | 1.04 (0.98, 1.10) | 0.229        | 1.02 (0.96, 1.08) | 0.499        |
| <b>Gastrointestinal tract cancers</b>       | <b>Intermediate genetic risk</b> | 1.01 (0.96, 1.07) | 0.718        | 1.01 (0.96, 1.07) | 0.751        | 1.02 (0.96, 1.09) | 0.508        | 1.02 (0.96, 1.09) | 0.530        |
|                                             | <b>High genetic risk</b>         | 1.08 (0.97, 1.20) | 0.150        | 1.07 (0.97, 1.19) | 0.195        | 0.99 (0.92, 1.07) | 0.824        | 0.99 (0.92, 1.07) | 0.846        |
| <b>Hepatobiliary and pancreatic cancers</b> | <b>Intermediate genetic risk</b> | 1.10 (0.99, 1.22) | 0.086        | 1.09 (0.98, 1.22) | 0.102        | 0.92 (0.82, 1.04) | 0.196        | 0.92 (0.82, 1.04) | 0.180        |
|                                             | <b>High genetic risk</b>         | 1.09 (0.88, 1.33) | 0.434        | 1.07 (0.87, 1.32) | 0.503        | 0.84 (0.72, 0.98) | <b>0.024</b> | 0.84 (0.72, 0.97) | <b>0.022</b> |

|                                   |                           | Lipids            |       |                   |              |                   |       |                   |       |
|-----------------------------------|---------------------------|-------------------|-------|-------------------|--------------|-------------------|-------|-------------------|-------|
|                                   |                           | TG                |       |                   |              | TC                |       |                   |       |
| Barretts esophagus                | Intermediate genetic risk | 1.00 (0.91, 1.10) | 0.991 | 1.00 (0.92, 1.10) | 0.945        | 0.95 (0.87, 1.04) | 0.304 | 0.96 (0.87, 1.05) | 0.340 |
|                                   | High genetic risk         | 0.98 (0.88, 1.10) | 0.717 | 0.98 (0.88, 1.10) | 0.780        | 1.02 (0.91, 1.13) | 0.789 | 1.02 (0.92, 1.14) | 0.701 |
| Gastroesophageal reflux disease   | Intermediate genetic risk | 1.00 (0.97, 1.04) | 0.823 | 1.00 (0.97, 1.04) | 0.789        | 0.99 (0.96, 1.02) | 0.533 | 0.99 (0.96, 1.03) | 0.710 |
|                                   | High genetic risk         | 0.98 (0.94, 1.02) | 0.224 | 0.98 (0.94, 1.02) | 0.251        | 0.98 (0.94, 1.02) | 0.309 | 0.99 (0.95, 1.03) | 0.535 |
| Gastritis and duodenitis          | Intermediate genetic risk | 0.98 (0.95, 1.02) | 0.272 | 0.98 (0.95, 1.02) | 0.306        | 1.02 (0.98, 1.05) | 0.356 | 1.02 (0.98, 1.05) | 0.303 |
|                                   | High genetic risk         | 0.96 (0.92, 1.01) | 0.088 | 0.97 (0.93, 1.01) | 0.101        | 0.99 (0.95, 1.03) | 0.716 | 1.00 (0.95, 1.04) | 0.845 |
| Celiac disease                    | Intermediate genetic risk | 0.94 (0.81, 1.09) | 0.403 | 0.94 (0.81, 1.09) | 0.416        | 1.09 (0.93, 1.28) | 0.275 | 1.09 (0.93, 1.27) | 0.305 |
|                                   | High genetic risk         | 0.84 (0.70, 1.02) | 0.082 | 0.85 (0.70, 1.02) | 0.084        | 1.02 (0.84, 1.24) | 0.835 | 1.01 (0.83, 1.22) | 0.928 |
| Peptic ulcer                      | Intermediate genetic risk | 1.00 (0.93, 1.07) | 0.962 | 1.00 (0.93, 1.07) | 0.981        | 0.97 (0.90, 1.04) | 0.326 | 0.97 (0.90, 1.04) | 0.374 |
|                                   | High genetic risk         | 0.96 (0.88, 1.05) | 0.410 | 0.97 (0.89, 1.06) | 0.462        | 0.98 (0.89, 1.06) | 0.578 | 0.98 (0.90, 1.07) | 0.700 |
| Crohn's disease                   | Intermediate genetic risk | 0.95 (0.79, 1.15) | 0.597 | 0.95 (0.79, 1.15) | 0.619        | 1.15 (0.95, 1.41) | 0.154 | 1.16 (0.95, 1.41) | 0.144 |
|                                   | High genetic risk         | 1.00 (0.80, 1.26) | 0.989 | 1.01 (0.80, 1.27) | 0.953        | 1.08 (0.85, 1.37) | 0.547 | 1.08 (0.85, 1.38) | 0.514 |
| Ulcerative colitis                | Intermediate genetic risk | 1.01 (0.88, 1.16) | 0.885 | 1.01 (0.88, 1.16) | 0.840        | 0.99 (0.87, 1.13) | 0.876 | 0.99 (0.87, 1.13) | 0.902 |
|                                   | High genetic risk         | 1.12 (0.95, 1.32) | 0.174 | 1.13 (0.96, 1.33) | 0.150        | 0.97 (0.82, 1.14) | 0.719 | 0.97 (0.83, 1.15) | 0.759 |
| Irritable bowel syndrome          | Intermediate genetic risk | 0.99 (0.92, 1.06) | 0.785 | 0.99 (0.92, 1.06) | 0.797        | 0.97 (0.91, 1.04) | 0.415 | 0.97 (0.91, 1.04) | 0.417 |
|                                   | High genetic risk         | 1.09 (1.00, 1.19) | 0.051 | 1.09 (1.00, 1.19) | 0.051        | 0.97 (0.89, 1.06) | 0.514 | 0.97 (0.89, 1.06) | 0.515 |
| Diverticular disease              | Intermediate genetic risk | 1.02 (0.99, 1.05) | 0.303 | 1.02 (0.99, 1.05) | 0.223        | 0.99 (0.96, 1.02) | 0.377 | 0.99 (0.96, 1.02) | 0.590 |
|                                   | High genetic risk         | 1.03 (0.99, 1.07) | 0.093 | 1.04 (1.00, 1.08) | <b>0.040</b> | 0.98 (0.94, 1.02) | 0.255 | 0.99 (0.95, 1.03) | 0.572 |
| Pancreatitis                      | Intermediate genetic risk | 0.99 (0.87, 1.12) | 0.841 | 0.99 (0.87, 1.12) | 0.880        | 0.99 (0.87, 1.13) | 0.919 | 1.00 (0.88, 1.14) | 0.969 |
|                                   | High genetic risk         | 0.86 (0.73, 1.01) | 0.059 | 0.86 (0.73, 1.01) | 0.071        | 1.00 (0.86, 1.17) | 0.994 | 1.02 (0.87, 1.19) | 0.812 |
| Non-alcoholic fatty liver disease | Intermediate genetic risk | 1.04 (0.96, 1.14) | 0.327 | 1.05 (0.96, 1.15) | 0.270        | 1.06 (0.97, 1.15) | 0.207 | 1.07 (0.98, 1.17) | 0.116 |
|                                   | High genetic risk         | 1.09 (0.99, 1.21) | 0.094 | 1.10 (0.99, 1.22) | 0.068        | 1.01 (0.91, 1.13) | 0.782 | 1.04 (0.94, 1.16) | 0.436 |
| Liver cirrhosis                   | Intermediate genetic risk | 1.02 (0.91, 1.15) | 0.686 | 1.03 (0.92, 1.16) | 0.603        | 1.08 (0.95, 1.22) | 0.227 | 1.09 (0.96, 1.23) | 0.178 |
|                                   | High genetic risk         | 0.91 (0.79, 1.06) | 0.240 | 0.93 (0.80, 1.08) | 0.318        | 1.07 (0.92, 1.24) | 0.392 | 1.09 (0.94, 1.26) | 0.273 |

|                                             |                                  |                   |              |                   |              |                   |              |                   |              |
|---------------------------------------------|----------------------------------|-------------------|--------------|-------------------|--------------|-------------------|--------------|-------------------|--------------|
| <b>Biliary disease</b>                      | <b>Intermediate genetic risk</b> | 0.96 (0.92, 1.01) | 0.087        | 0.96 (0.91, 1.01) | 0.085        | 0.93 (0.88, 0.97) | <b>0.001</b> | 0.94 (0.89, 0.98) | <b>0.006</b> |
|                                             | <b>High genetic risk</b>         | 0.91 (0.85, 0.96) | <b>0.001</b> | 0.91 (0.85, 0.96) | <b>0.001</b> | 0.84 (0.79, 0.89) | <b>0.000</b> | 0.86 (0.81, 0.91) | <b>0.000</b> |
| <b>Gastrointestinal tract cancers</b>       | <b>Intermediate genetic risk</b> | 0.95 (0.89, 1.01) | 0.118        | 0.95 (0.90, 1.02) | 0.146        | 1.05 (0.99, 1.12) | 0.129        | 1.06 (0.99, 1.13) | 0.106        |
|                                             | <b>High genetic risk</b>         | 1.02 (0.94, 1.10) | 0.684        | 1.02 (0.95, 1.11) | 0.560        | 1.03 (0.96, 1.12) | 0.407        | 1.04 (0.96, 1.13) | 0.308        |
| <b>Hepatobiliary and pancreatic cancers</b> | <b>Intermediate genetic risk</b> | 0.96 (0.85, 1.08) | 0.477        | 0.96 (0.85, 1.08) | 0.510        | 0.93 (0.82, 1.05) | 0.218        | 0.93 (0.82, 1.05) | 0.247        |
|                                             | <b>High genetic risk</b>         | 0.86 (0.74, 1.00) | 0.057        | 0.87 (0.74, 1.01) | 0.070        | 0.83 (0.72, 0.97) | <b>0.021</b> | 0.84 (0.72, 0.98) | <b>0.031</b> |
| <b>Lipids</b>                               |                                  |                   |              |                   |              |                   |              |                   |              |
| <b>LDL-C</b>                                |                                  |                   |              |                   | <b>HDL-C</b> |                   |              |                   |              |
| <b>Barretts esophagus</b>                   | <b>Intermediate genetic risk</b> | 0.92 (0.84, 1.00) | 0.055        | 0.92 (0.84, 1.00) | 0.063        | 0.99 (0.90, 1.08) | 0.759        | 0.99 (0.90, 1.08) | 0.753        |
|                                             | <b>High genetic risk</b>         | 0.99 (0.89, 1.11) | 0.916        | 1.00 (0.90, 1.12) | 0.986        | 0.96 (0.86, 1.08) | 0.514        | 0.96 (0.86, 1.07) | 0.491        |
| <b>Gastroesophageal reflux disease</b>      | <b>Intermediate genetic risk</b> | 0.96 (0.93, 1.00) | <b>0.026</b> | 0.97 (0.94, 1.00) | <b>0.045</b> | 1.00 (0.97, 1.03) | 0.993        | 1.00 (0.97, 1.03) | 0.935        |
|                                             | <b>High genetic risk</b>         | 0.97 (0.93, 1.01) | 0.130        | 0.98 (0.94, 1.02) | 0.260        | 0.98 (0.94, 1.02) | 0.389        | 0.98 (0.94, 1.02) | 0.322        |
| <b>Gastritis and duodenitis</b>             | <b>Intermediate genetic risk</b> | 1.01 (0.97, 1.04) | 0.766        | 1.01 (0.97, 1.04) | 0.715        | 1.01 (0.97, 1.04) | 0.637        | 1.01 (0.97, 1.04) | 0.665        |
|                                             | <b>High genetic risk</b>         | 1.00 (0.96, 1.04) | 0.944        | 1.01 (0.96, 1.05) | 0.811        | 1.02 (0.98, 1.07) | 0.255        | 1.02 (0.98, 1.07) | 0.301        |
| <b>Celiac disease</b>                       | <b>Intermediate genetic risk</b> | 1.12 (0.96, 1.31) | 0.156        | 1.12 (0.95, 1.31) | 0.173        | 0.92 (0.79, 1.07) | 0.273        | 0.92 (0.80, 1.07) | 0.281        |
|                                             | <b>High genetic risk</b>         | 1.04 (0.85, 1.26) | 0.723        | 1.03 (0.84, 1.25) | 0.801        | 0.74 (0.61, 0.90) | <b>0.003</b> | 0.74 (0.61, 0.90) | <b>0.003</b> |
| <b>Peptic ulcer</b>                         | <b>Intermediate genetic risk</b> | 0.98 (0.91, 1.05) | 0.562        | 0.98 (0.91, 1.05) | 0.612        | 0.98 (0.91, 1.05) | 0.615        | 0.98 (0.91, 1.05) | 0.591        |
|                                             | <b>High genetic risk</b>         | 0.98 (0.90, 1.07) | 0.687        | 0.99 (0.91, 1.08) | 0.818        | 1.03 (0.94, 1.12) | 0.512        | 1.03 (0.94, 1.12) | 0.554        |
| <b>Crohn's disease</b>                      | <b>Intermediate genetic risk</b> | 1.14 (0.94, 1.40) | 0.182        | 1.15 (0.94, 1.40) | 0.175        | 1.04 (0.86, 1.25) | 0.708        | 1.04 (0.86, 1.25) | 0.709        |
|                                             | <b>High genetic risk</b>         | 1.15 (0.91, 1.46) | 0.253        | 1.16 (0.91, 1.47) | 0.232        | 0.88 (0.69, 1.12) | 0.312        | 0.88 (0.69, 1.12) | 0.304        |
| <b>Ulcerative colitis</b>                   | <b>Intermediate genetic risk</b> | 0.90 (0.79, 1.03) | 0.122        | 0.90 (0.79, 1.03) | 0.125        | 1.00 (0.87, 1.14) | 0.986        | 1.00 (0.87, 1.14) | 0.990        |
|                                             | <b>High genetic risk</b>         | 1.04 (0.89, 1.22) | 0.638        | 1.04 (0.89, 1.22) | 0.595        | 1.01 (0.86, 1.19) | 0.910        | 1.01 (0.86, 1.19) | 0.925        |
| <b>Irritable bowel syndrome</b>             | <b>Intermediate genetic risk</b> | 0.97 (0.90, 1.04) | 0.392        | 0.97 (0.90, 1.04) | 0.386        | 1.05 (0.97, 1.12) | 0.208        | 1.05 (0.97, 1.12) | 0.212        |
|                                             | <b>High genetic risk</b>         | 0.97 (0.89, 1.06) | 0.525        | 0.97 (0.89, 1.06) | 0.523        | 1.01 (0.93, 1.10) | 0.827        | 1.01 (0.92, 1.10) | 0.850        |
| <b>Diverticular disease</b>                 | <b>Intermediate genetic risk</b> | 0.99 (0.96, 1.02) | 0.380        | 0.99 (0.96, 1.02) | 0.572        | 0.98 (0.95, 1.01) | 0.277        | 0.98 (0.95, 1.01) | 0.285        |

|                                      |                           |                      |              |                   |              |                   |              |                   |              |  |
|--------------------------------------|---------------------------|----------------------|--------------|-------------------|--------------|-------------------|--------------|-------------------|--------------|--|
| Pancreatitis                         | High genetic risk         | 0.96 (0.93, 1.00)    | 0.054        | 0.98 (0.94, 1.01) | 0.180        | 0.99 (0.95, 1.02) | 0.472        | 0.99 (0.95, 1.02) | 0.430        |  |
|                                      | Intermediate genetic risk | 0.99 (0.87, 1.13)    | 0.879        | 1.00 (0.88, 1.14) | 0.985        | 0.85 (0.75, 0.96) | <b>0.010</b> | 0.85 (0.75, 0.96) | <b>0.009</b> |  |
| Non-alcoholic fatty liver disease    | High genetic risk         | 0.98 (0.84, 1.15)    | 0.790        | 1.00 (0.85, 1.17) | 0.979        | 0.89 (0.77, 1.04) | 0.151        | 0.89 (0.76, 1.03) | 0.125        |  |
|                                      | Intermediate genetic risk | 1.03 (0.95, 1.12)    | 0.475        | 1.05 (0.96, 1.14) | 0.305        | 0.97 (0.89, 1.06) | 0.483        | 0.96 (0.88, 1.05) | 0.361        |  |
| Liver cirrhosis                      | High genetic risk         | 1.03 (0.93, 1.14)    | 0.565        | 1.06 (0.96, 1.18) | 0.251        | 0.97 (0.87, 1.07) | 0.528        | 0.96 (0.86, 1.06) | 0.394        |  |
|                                      | Intermediate genetic risk | 1.13 (1.00, 1.28)    | <b>0.049</b> | 1.14 (1.01, 1.29) | <b>0.037</b> | 0.96 (0.85, 1.08) | 0.516        | 0.96 (0.85, 1.08) | 0.482        |  |
| Biliary disease                      | High genetic risk         | 1.15 (0.99, 1.34)    | 0.063        | 1.17 (1.01, 1.36) | <b>0.034</b> | 0.99 (0.86, 1.15) | 0.911        | 0.99 (0.85, 1.14) | 0.844        |  |
|                                      | Intermediate genetic risk | 0.93 (0.88, 0.97)    | <b>0.001</b> | 0.94 (0.89, 0.98) | <b>0.006</b> | 0.97 (0.92, 1.02) | 0.198        | 0.97 (0.92, 1.01) | 0.154        |  |
| Gastrointestinal tract cancers       | High genetic risk         | 0.83 (0.78, 0.88)    | <b>0.000</b> | 0.84 (0.80, 0.90) | <b>0.000</b> | 1.02 (0.96, 1.08) | 0.607        | 1.01 (0.95, 1.07) | 0.766        |  |
|                                      | Intermediate genetic risk | 1.01 (0.95, 1.08)    | 0.791        | 1.01 (0.95, 1.08) | 0.724        | 0.99 (0.93, 1.06) | 0.860        | 0.99 (0.93, 1.06) | 0.867        |  |
| Hepatobiliary and pancreatic cancers | High genetic risk         | 0.98 (0.90, 1.06)    | 0.554        | 0.98 (0.91, 1.07) | 0.695        | 0.98 (0.90, 1.06) | 0.571        | 0.98 (0.90, 1.06) | 0.549        |  |
|                                      | Intermediate genetic risk | 0.91 (0.81, 1.03)    | 0.136        | 0.92 (0.81, 1.03) | 0.156        | 1.08 (0.95, 1.22) | 0.244        | 1.08 (0.95, 1.22) | 0.250        |  |
|                                      | High genetic risk         | 0.84 (0.72, 0.98)    | <b>0.025</b> | 0.85 (0.73, 0.99) | <b>0.036</b> | 0.98 (0.84, 1.15) | 0.825        | 0.98 (0.84, 1.15) | 0.800        |  |
|                                      |                           | <b>Liver enzymes</b> |              |                   |              |                   |              |                   |              |  |
|                                      |                           | <b>AST</b>           |              |                   |              | <b>ALT</b>        |              |                   |              |  |
| Barretts esophagus                   | Intermediate genetic risk | /                    |              | /                 |              | 1.09 (1.00, 1.20) | 0.055        | 1.10 (1.00, 1.20) | <b>0.049</b> |  |
|                                      | High genetic risk         | 1.10 (0.57, 2.12)    | 0.782        | 1.10 (0.57, 2.13) | 0.768        | 1.03 (0.92, 1.15) | 0.622        | 1.03 (0.92, 1.16) | 0.569        |  |
| Gastroesophageal reflux disease      | Intermediate genetic risk | /                    |              | /                 |              | 0.99 (0.96, 1.02) | 0.494        | 0.99 (0.96, 1.02) | 0.508        |  |
|                                      | High genetic risk         | 0.93 (0.72, 1.20)    | 0.591        | 0.94 (0.73, 1.21) | 0.625        | 0.99 (0.95, 1.03) | 0.538        | 0.99 (0.95, 1.03) | 0.632        |  |
| Gastritis and duodenitis             | Intermediate genetic risk | /                    |              | /                 |              | 0.99 (0.95, 1.02) | 0.457        | 0.99 (0.95, 1.02) | 0.466        |  |
|                                      | High genetic risk         | 1.05 (0.82, 1.35)    | 0.686        | 1.06 (0.82, 1.36) | 0.658        | 0.99 (0.95, 1.03) | 0.635        | 0.99 (0.95, 1.03) | 0.685        |  |
| Celiac disease                       | Intermediate genetic risk | /                    |              | /                 |              | 1.13 (0.97, 1.33) | 0.116        | 1.14 (0.97, 1.33) | 0.115        |  |
|                                      | High genetic risk         | 1.37 (0.51, 3.65)    | 0.534        | 1.37 (0.51, 3.66) | 0.532        | 1.05 (0.86, 1.28) | 0.622        | 1.05 (0.86, 1.27) | 0.646        |  |
| Peptic ulcer                         | Intermediate genetic risk | /                    |              | /                 |              | 0.95 (0.88, 1.01) | 0.120        | 0.95 (0.88, 1.02) | 0.131        |  |
|                                      | High genetic risk         | 1.10 (0.66, 1.84)    | 0.706        | 1.11 (0.67, 1.86) | 0.677        | 0.97 (0.89, 1.06) | 0.537        | 0.98 (0.90, 1.07) | 0.612        |  |

|                                             |                                  |                   |              |                   |              |                   |              |                   |              |
|---------------------------------------------|----------------------------------|-------------------|--------------|-------------------|--------------|-------------------|--------------|-------------------|--------------|
| <b>Crohn's disease</b>                      | <b>Intermediate genetic risk</b> | /                 | /            | 1.03 (0.85, 1.25) | 0.735        | 1.04 (0.86, 1.26) | 0.713        |                   |              |
|                                             | <b>High genetic risk</b>         | 1.57 (0.50, 4.88) | 0.439        | 1.59 (0.51, 4.95) | 0.424        | 0.98 (0.77, 1.24) | 0.864        | 0.99 (0.78, 1.25) | 0.904        |
| <b>Ulcerative colitis</b>                   | <b>Intermediate genetic risk</b> | /                 | /            | 0.90 (0.79, 1.03) | 0.133        | 0.91 (0.80, 1.04) | 0.149        |                   |              |
|                                             | <b>High genetic risk</b>         | 0.52 (0.13, 2.07) | 0.350        | 0.52 (0.13, 2.10) | 0.362        | 0.95 (0.81, 1.12) | 0.525        | 0.96 (0.81, 1.12) | 0.581        |
| <b>Irritable bowel syndrome</b>             | <b>Intermediate genetic risk</b> | /                 | /            | 0.93 (0.87, 1.00) | <b>0.047</b> | 0.93 (0.87, 1.00) | <b>0.046</b> |                   |              |
|                                             | <b>High genetic risk</b>         | 0.61 (0.32, 1.18) | 0.140        | 0.61 (0.32, 1.18) | 0.144        | 1.00 (0.92, 1.09) | 0.964        | 1.00 (0.92, 1.09) | 0.959        |
| <b>Diverticular disease</b>                 | <b>Intermediate genetic risk</b> | /                 | /            | 0.96 (0.93, 0.99) | <b>0.007</b> | 0.96 (0.94, 0.99) | <b>0.015</b> |                   |              |
|                                             | <b>High genetic risk</b>         | 1.16 (0.94, 1.44) | 0.175        | 1.18 (0.95, 1.46) | 0.138        | 0.92 (0.89, 0.96) | <b>0.000</b> | 0.93 (0.90, 0.96) | <b>0.000</b> |
| <b>Pancreatitis</b>                         | <b>Intermediate genetic risk</b> | /                 | /            | 0.98 (0.86, 1.11) | 0.728        | 0.98 (0.86, 1.11) | 0.765        |                   |              |
|                                             | <b>High genetic risk</b>         | 1.21 (0.50, 2.92) | 0.671        | 1.23 (0.51, 2.97) | 0.645        | 1.00 (0.85, 1.16) | 0.954        | 1.00 (0.86, 1.17) | 0.957        |
| <b>Non-alcoholic fatty liver disease</b>    | <b>Intermediate genetic risk</b> | /                 | /            | 1.40 (1.27, 1.54) | <b>0.000</b> | 1.41 (1.28, 1.56) | <b>0.000</b> |                   |              |
|                                             | <b>High genetic risk</b>         | 1.10 (0.61, 1.99) | 0.757        | 1.13 (0.62, 2.05) | 0.698        | 1.78 (1.60, 1.98) | <b>0.000</b> | 1.82 (1.64, 2.03) | <b>0.000</b> |
| <b>Liver cirrhosis</b>                      | <b>Intermediate genetic risk</b> | /                 | /            | 1.17 (1.03, 1.33) | <b>0.014</b> | 1.18 (1.04, 1.34) | <b>0.010</b> |                   |              |
|                                             | <b>High genetic risk</b>         | 0.62 (0.20, 1.91) | 0.402        | 0.63 (0.20, 1.96) | 0.427        | 1.38 (1.19, 1.60) | <b>0.000</b> | 1.40 (1.21, 1.63) | <b>0.000</b> |
| <b>Biliary disease</b>                      | <b>Intermediate genetic risk</b> | /                 | /            | 1.01 (0.96, 1.06) | 0.652        | 1.01 (0.97, 1.06) | 0.590        |                   |              |
|                                             | <b>High genetic risk</b>         | 0.94 (0.65, 1.36) | 0.748        | 0.95 (0.66, 1.38) | 0.803        | 1.00 (0.94, 1.06) | 0.931        | 1.01 (0.95, 1.07) | 0.868        |
| <b>Gastrointestinal tract cancers</b>       | <b>Intermediate genetic risk</b> | /                 | /            | 0.95 (0.89, 1.01) | 0.105        | 0.95 (0.89, 1.01) | 0.131        |                   |              |
|                                             | <b>High genetic risk</b>         | 0.80 (0.46, 1.38) | 0.421        | 0.81 (0.47, 1.40) | 0.445        | 0.95 (0.88, 1.03) | 0.181        | 0.95 (0.88, 1.03) | 0.243        |
| <b>Hepatobiliary and pancreatic cancers</b> | <b>Intermediate genetic risk</b> | /                 | /            | 0.88 (0.78, 0.99) | <b>0.036</b> | 0.88 (0.78, 1.00) | <b>0.041</b> |                   |              |
|                                             | <b>High genetic risk</b>         | 0.24 (0.03, 1.67) | 0.149        | 0.24 (0.03, 1.70) | 0.153        | 1.07 (0.93, 1.24) | 0.356        | 1.08 (0.93, 1.25) | 0.306        |
| <b>Liver enzymes</b>                        |                                  |                   |              |                   |              |                   |              |                   |              |
| <b>ALP</b>                                  |                                  |                   |              |                   |              |                   |              |                   |              |
| <b>Barretts esophagus</b>                   | <b>Intermediate genetic risk</b> | 1.07 (0.97, 1.17) | 0.174        | 1.07 (0.97, 1.17) | 0.166        | 0.88 (0.80, 0.96) | <b>0.003</b> | 0.88 (0.80, 0.96) | <b>0.004</b> |
|                                             | <b>High genetic risk</b>         | 1.15 (1.03, 1.28) | <b>0.017</b> | 1.15 (1.03, 1.28) | <b>0.014</b> | 0.93 (0.83, 1.03) | 0.164        | 0.93 (0.83, 1.03) | 0.167        |
| <b>Gastroesophageal reflux disease</b>      | <b>Intermediate genetic risk</b> | 0.99 (0.96, 1.02) | 0.457        | 0.99 (0.96, 1.02) | 0.498        | 0.98 (0.95, 1.01) | 0.195        | 0.98 (0.95, 1.01) | 0.197        |



|                                          |                                  |                   |              |                   |              |                   |              |                   |              |
|------------------------------------------|----------------------------------|-------------------|--------------|-------------------|--------------|-------------------|--------------|-------------------|--------------|
|                                          | <b>High genetic risk</b>         | 0.99 (0.95, 1.03) | 0.732        | 1.00 (0.96, 1.04) | 0.822        | 0.99 (0.95, 1.03) | 0.531        | 0.99 (0.95, 1.03) | 0.513        |
| <b>Gastritis and duodenitis</b>          | <b>Intermediate genetic risk</b> | 0.99 (0.96, 1.02) | 0.569        | 0.99 (0.96, 1.02) | 0.568        | 0.98 (0.95, 1.01) | 0.230        | 0.98 (0.95, 1.01) | 0.246        |
|                                          | <b>High genetic risk</b>         | 0.97 (0.93, 1.01) | 0.135        | 0.97 (0.93, 1.01) | 0.139        | 0.99 (0.95, 1.03) | 0.547        | 0.99 (0.95, 1.03) | 0.556        |
| <b>Celiac disease</b>                    | <b>Intermediate genetic risk</b> | 0.89 (0.77, 1.04) | 0.133        | 0.89 (0.77, 1.03) | 0.123        | 1.03 (0.89, 1.21) | 0.666        | 1.04 (0.89, 1.21) | 0.657        |
|                                          | <b>High genetic risk</b>         | 0.93 (0.77, 1.12) | 0.433        | 0.92 (0.77, 1.11) | 0.401        | 0.95 (0.79, 1.15) | 0.619        | 0.96 (0.79, 1.16) | 0.644        |
| <b>Peptic ulcer</b>                      | <b>Intermediate genetic risk</b> | 1.01 (0.94, 1.08) | 0.783        | 1.01 (0.94, 1.09) | 0.763        | 0.99 (0.92, 1.07) | 0.831        | 0.99 (0.92, 1.07) | 0.852        |
|                                          | <b>High genetic risk</b>         | 0.98 (0.90, 1.07) | 0.712        | 0.99 (0.90, 1.08) | 0.751        | 1.01 (0.93, 1.11) | 0.744        | 1.02 (0.93, 1.11) | 0.734        |
| <b>Crohn's disease</b>                   | <b>Intermediate genetic risk</b> | 0.98 (0.81, 1.18) | 0.812        | 0.98 (0.81, 1.18) | 0.816        | 0.94 (0.78, 1.13) | 0.507        | 0.94 (0.78, 1.13) | 0.507        |
|                                          | <b>High genetic risk</b>         | 0.95 (0.75, 1.20) | 0.648        | 0.95 (0.75, 1.20) | 0.668        | 0.83 (0.65, 1.05) | 0.117        | 0.83 (0.65, 1.05) | 0.118        |
| <b>Ulcerative colitis</b>                | <b>Intermediate genetic risk</b> | 1.01 (0.88, 1.15) | 0.904        | 1.01 (0.88, 1.16) | 0.900        | 1.07 (0.93, 1.23) | 0.328        | 1.07 (0.93, 1.23) | 0.328        |
|                                          | <b>High genetic risk</b>         | 1.07 (0.91, 1.26) | 0.430        | 1.07 (0.91, 1.26) | 0.406        | 1.09 (0.92, 1.29) | 0.313        | 1.09 (0.92, 1.29) | 0.309        |
| <b>Irritable bowel syndrome</b>          | <b>Intermediate genetic risk</b> | 0.98 (0.92, 1.06) | 0.652        | 0.98 (0.92, 1.06) | 0.640        | 0.95 (0.89, 1.02) | 0.167        | 0.95 (0.89, 1.02) | 0.171        |
|                                          | <b>High genetic risk</b>         | 1.02 (0.94, 1.11) | 0.646        | 1.02 (0.94, 1.11) | 0.660        | 0.98 (0.90, 1.06) | 0.601        | 0.98 (0.90, 1.06) | 0.606        |
| <b>Diverticular disease</b>              | <b>Intermediate genetic risk</b> | 1.02 (0.99, 1.05) | 0.274        | 1.02 (0.99, 1.05) | 0.213        | 0.98 (0.95, 1.01) | 0.130        | 0.98 (0.95, 1.01) | 0.116        |
|                                          | <b>High genetic risk</b>         | 0.99 (0.96, 1.03) | 0.741        | 1.00 (0.96, 1.04) | 0.978        | 0.98 (0.94, 1.02) | 0.255        | 0.98 (0.94, 1.02) | 0.245        |
| <b>Pancreatitis</b>                      | <b>Intermediate genetic risk</b> | 0.96 (0.85, 1.09) | 0.541        | 0.96 (0.85, 1.10) | 0.573        | 1.00 (0.88, 1.13) | 0.947        | 1.00 (0.88, 1.13) | 0.947        |
|                                          | <b>High genetic risk</b>         | 0.98 (0.84, 1.15) | 0.846        | 0.99 (0.85, 1.16) | 0.914        | 0.96 (0.82, 1.13) | 0.633        | 0.96 (0.82, 1.13) | 0.634        |
| <b>Non-alcoholic fatty liver disease</b> | <b>Intermediate genetic risk</b> | 1.02 (0.93, 1.11) | 0.684        | 1.02 (0.94, 1.11) | 0.626        | 1.08 (0.99, 1.18) | 0.091        | 1.08 (0.99, 1.18) | 0.087        |
|                                          | <b>High genetic risk</b>         | 1.07 (0.96, 1.18) | 0.226        | 1.08 (0.97, 1.19) | 0.164        | 1.23 (1.11, 1.37) | <b>0.000</b> | 1.24 (1.11, 1.37) | <b>0.000</b> |
| <b>Liver cirrhosis</b>                   | <b>Intermediate genetic risk</b> | 0.98 (0.87, 1.10) | 0.723        | 0.98 (0.87, 1.11) | 0.765        | 1.03 (0.92, 1.17) | 0.584        | 1.04 (0.92, 1.17) | 0.576        |
|                                          | <b>High genetic risk</b>         | 1.03 (0.89, 1.19) | 0.653        | 1.04 (0.90, 1.21) | 0.560        | 1.02 (0.88, 1.19) | 0.761        | 1.03 (0.88, 1.19) | 0.743        |
| <b>Biliary disease</b>                   | <b>Intermediate genetic risk</b> | 0.92 (0.88, 0.96) | <b>0.001</b> | 0.92 (0.88, 0.97) | <b>0.001</b> | 1.07 (1.02, 1.12) | <b>0.009</b> | 1.07 (1.02, 1.12) | <b>0.010</b> |
|                                          | <b>High genetic risk</b>         | 0.89 (0.84, 0.94) | <b>0.000</b> | 0.89 (0.84, 0.95) | <b>0.000</b> | 1.13 (1.07, 1.20) | <b>0.000</b> | 1.13 (1.07, 1.20) | <b>0.000</b> |
| <b>Gastrointestinal tract cancers</b>    | <b>Intermediate genetic risk</b> | 0.98 (0.92, 1.05) | 0.600        | 0.98 (0.92, 1.05) | 0.632        | 1.01 (0.94, 1.07) | 0.841        | 1.01 (0.94, 1.07) | 0.835        |
|                                          | <b>High genetic risk</b>         | 0.97 (0.89, 1.05) | 0.421        | 0.97 (0.90, 1.05) | 0.491        | 1.03 (0.95, 1.11) | 0.497        | 1.03 (0.95, 1.11) | 0.488        |

|                                             |                                  |                   |              |                   |              |                   |              |                   |              |
|---------------------------------------------|----------------------------------|-------------------|--------------|-------------------|--------------|-------------------|--------------|-------------------|--------------|
| <b>Hepatobiliary and pancreatic cancers</b> | <b>Intermediate genetic risk</b> | 0.89 (0.79, 1.01) | 0.063        | 0.89 (0.79, 1.01) | 0.069        | 1.00 (0.88, 1.13) | 0.971        | 1.00 (0.88, 1.13) | 0.979        |
|                                             | <b>High genetic risk</b>         | 0.85 (0.73, 0.99) | <b>0.039</b> | 0.86 (0.74, 1.00) | <b>0.047</b> | 1.06 (0.91, 1.23) | 0.464        | 1.06 (0.91, 1.23) | 0.454        |
|                                             |                                  | <b>Trypsin</b>    |              |                   |              |                   |              |                   |              |
|                                             |                                  | <b>Trypsin1</b>   |              |                   |              | <b>Trypsin2</b>   |              |                   |              |
| <b>Barretts esophagus</b>                   | <b>Intermediate genetic risk</b> | 1.01 (0.92, 1.11) | 0.800        | 1.01 (0.92, 1.11) | 0.797        | 0.93 (0.85, 1.01) | 0.099        | 0.93 (0.85, 1.01) | 0.094        |
|                                             | <b>High genetic risk</b>         | 0.93 (0.83, 1.04) | 0.225        | 0.93 (0.83, 1.04) | 0.226        | 0.95 (0.85, 1.06) | 0.320        | 0.94 (0.85, 1.05) | 0.308        |
| <b>Gastroesophageal reflux disease</b>      | <b>Intermediate genetic risk</b> | 1.02 (0.98, 1.05) | 0.316        | 1.02 (0.98, 1.05) | 0.327        | 0.97 (0.94, 1.00) | 0.050        | 0.97 (0.94, 1.00) | 0.055        |
|                                             | <b>High genetic risk</b>         | 1.00 (0.96, 1.04) | 0.994        | 1.00 (0.96, 1.04) | 0.949        | 0.96 (0.93, 1.00) | 0.072        | 0.96 (0.93, 1.00) | 0.077        |
| <b>Gastritis and duodenitis</b>             | <b>Intermediate genetic risk</b> | 1.02 (0.99, 1.06) | 0.249        | 1.02 (0.99, 1.06) | 0.253        | 0.96 (0.92, 0.99) | <b>0.009</b> | 0.96 (0.92, 0.99) | <b>0.011</b> |
|                                             | <b>High genetic risk</b>         | 1.02 (0.98, 1.07) | 0.327        | 1.02 (0.98, 1.06) | 0.356        | 0.94 (0.90, 0.98) | <b>0.004</b> | 0.94 (0.90, 0.98) | <b>0.005</b> |
| <b>Celiac disease</b>                       | <b>Intermediate genetic risk</b> | 0.99 (0.85, 1.16) | 0.944        | 1.00 (0.86, 1.16) | 0.949        | 0.83 (0.72, 0.97) | <b>0.016</b> | 0.83 (0.72, 0.97) | <b>0.017</b> |
|                                             | <b>High genetic risk</b>         | 0.86 (0.71, 1.05) | 0.138        | 0.86 (0.71, 1.05) | 0.139        | 0.89 (0.74, 1.07) | 0.213        | 0.89 (0.74, 1.07) | 0.218        |
| <b>Peptic ulcer</b>                         | <b>Intermediate genetic risk</b> | 1.02 (0.95, 1.10) | 0.507        | 1.02 (0.95, 1.10) | 0.503        | 0.98 (0.91, 1.05) | 0.584        | 0.98 (0.91, 1.05) | 0.592        |
|                                             | <b>High genetic risk</b>         | 1.08 (0.99, 1.18) | 0.085        | 1.08 (0.99, 1.18) | 0.091        | 0.95 (0.87, 1.04) | 0.263        | 0.95 (0.87, 1.04) | 0.273        |
| <b>Crohn's disease</b>                      | <b>Intermediate genetic risk</b> | 1.01 (0.84, 1.23) | 0.881        | 1.02 (0.84, 1.23) | 0.876        | 0.89 (0.74, 1.07) | 0.220        | 0.89 (0.74, 1.07) | 0.219        |
|                                             | <b>High genetic risk</b>         | 0.92 (0.72, 1.16) | 0.470        | 0.92 (0.72, 1.16) | 0.470        | 0.88 (0.70, 1.11) | 0.294        | 0.88 (0.70, 1.11) | 0.294        |
| <b>Ulcerative colitis</b>                   | <b>Intermediate genetic risk</b> | 0.97 (0.85, 1.10) | 0.603        | 0.97 (0.85, 1.10) | 0.612        | 0.89 (0.78, 1.01) | 0.073        | 0.89 (0.78, 1.01) | 0.071        |
|                                             | <b>High genetic risk</b>         | 0.94 (0.80, 1.11) | 0.480        | 0.94 (0.80, 1.11) | 0.483        | 0.96 (0.81, 1.12) | 0.584        | 0.96 (0.81, 1.12) | 0.576        |
| <b>Irritable bowel syndrome</b>             | <b>Intermediate genetic risk</b> | 0.96 (0.89, 1.03) | 0.219        | 0.96 (0.89, 1.03) | 0.220        | 0.99 (0.92, 1.06) | 0.773        | 0.99 (0.92, 1.06) | 0.800        |
|                                             | <b>High genetic risk</b>         | 0.99 (0.90, 1.07) | 0.741        | 0.99 (0.90, 1.07) | 0.729        | 1.03 (0.94, 1.12) | 0.541        | 1.03 (0.94, 1.12) | 0.519        |
| <b>Diverticular disease</b>                 | <b>Intermediate genetic risk</b> | 0.98 (0.95, 1.01) | 0.196        | 0.98 (0.95, 1.01) | 0.210        | 1.02 (0.99, 1.05) | 0.285        | 1.01 (0.98, 1.04) | 0.370        |
|                                             | <b>High genetic risk</b>         | 1.00 (0.96, 1.04) | 0.921        | 1.00 (0.96, 1.04) | 0.950        | 1.01 (0.97, 1.04) | 0.760        | 1.00 (0.97, 1.04) | 0.898        |
| <b>Pancreatitis</b>                         | <b>Intermediate genetic risk</b> | 0.96 (0.85, 1.09) | 0.538        | 0.96 (0.85, 1.09) | 0.534        | 0.86 (0.76, 0.98) | <b>0.018</b> | 0.86 (0.76, 0.98) | <b>0.019</b> |
|                                             | <b>High genetic risk</b>         | 0.95 (0.81, 1.11) | 0.544        | 0.95 (0.81, 1.11) | 0.534        | 0.95 (0.82, 1.11) | 0.547        | 0.95 (0.82, 1.11) | 0.544        |
| <b>Non-alcoholic fatty liver disease</b>    | <b>Intermediate genetic risk</b> | 1.07 (0.98, 1.16) | 0.150        | 1.07 (0.98, 1.16) | 0.154        | 1.02 (0.94, 1.11) | 0.614        | 1.03 (0.94, 1.12) | 0.565        |

|                                      |                           |                   |              |                   |              |                   |              |                   |              |
|--------------------------------------|---------------------------|-------------------|--------------|-------------------|--------------|-------------------|--------------|-------------------|--------------|
| Liver cirrhosis                      | High genetic risk         | 1.08 (0.97, 1.20) | 0.139        | 1.08 (0.97, 1.20) | 0.146        | 0.93 (0.84, 1.04) | 0.189        | 0.93 (0.84, 1.04) | 0.195        |
|                                      | Intermediate genetic risk | 1.03 (0.91, 1.16) | 0.636        | 1.03 (0.91, 1.16) | 0.618        | 0.92 (0.82, 1.03) | 0.164        | 0.92 (0.82, 1.03) | 0.153        |
| Biliary disease                      | High genetic risk         | 1.04 (0.90, 1.20) | 0.612        | 1.04 (0.90, 1.20) | 0.603        | 0.94 (0.81, 1.08) | 0.382        | 0.94 (0.81, 1.08) | 0.365        |
|                                      | Intermediate genetic risk | 1.00 (0.96, 1.05) | 0.917        | 1.00 (0.95, 1.05) | 0.950        | 0.94 (0.89, 0.98) | <b>0.008</b> | 0.94 (0.90, 0.98) | <b>0.009</b> |
| Gastrointestinal tract cancers       | High genetic risk         | 0.98 (0.92, 1.03) | 0.405        | 0.97 (0.92, 1.03) | 0.373        | 0.95 (0.90, 1.01) | 0.080        | 0.95 (0.90, 1.01) | 0.081        |
|                                      | Intermediate genetic risk | 1.01 (0.95, 1.08) | 0.790        | 1.01 (0.95, 1.08) | 0.779        | 1.00 (0.94, 1.07) | 0.922        | 1.00 (0.94, 1.07) | 0.981        |
| Hepatobiliary and pancreatic cancers | High genetic risk         | 0.98 (0.91, 1.06) | 0.630        | 0.98 (0.91, 1.06) | 0.627        | 0.96 (0.89, 1.04) | 0.364        | 0.96 (0.89, 1.04) | 0.331        |
|                                      | Intermediate genetic risk | 0.98 (0.86, 1.10) | 0.707        | 0.98 (0.87, 1.11) | 0.720        | 0.89 (0.79, 1.01) | 0.065        | 0.89 (0.79, 1.01) | 0.060        |
|                                      | High genetic risk         | 0.85 (0.73, 1.00) | <b>0.044</b> | 0.85 (0.73, 1.00) | <b>0.044</b> | 0.96 (0.82, 1.11) | 0.569        | 0.96 (0.82, 1.11) | 0.553        |
| <b>Trypsin</b>                       |                           |                   |              |                   |              |                   |              |                   |              |
| <b>Trypsin3</b>                      |                           |                   |              |                   |              |                   |              |                   |              |
| Barretts esophagus                   | Intermediate genetic risk | 1.01 (0.92, 1.10) | 0.862        | 1.01 (0.92, 1.10) | 0.837        |                   |              |                   |              |
|                                      | High genetic risk         | 0.94 (0.84, 1.06) | 0.306        | 0.94 (0.84, 1.06) | 0.316        |                   |              |                   |              |
| Gastroesophageal reflux disease      | Intermediate genetic risk | 0.98 (0.95, 1.02) | 0.352        | 0.98 (0.95, 1.02) | 0.336        |                   |              |                   |              |
|                                      | High genetic risk         | 1.01 (0.97, 1.05) | 0.666        | 1.01 (0.97, 1.05) | 0.757        |                   |              |                   |              |
| Gastritis and duodenitis             | Intermediate genetic risk | 1.00 (0.96, 1.03) | 0.853        | 1.00 (0.96, 1.03) | 0.886        |                   |              |                   |              |
|                                      | High genetic risk         | 1.00 (0.96, 1.04) | 0.914        | 1.00 (0.96, 1.04) | 0.901        |                   |              |                   |              |
| Celiac disease                       | Intermediate genetic risk | 1.09 (0.93, 1.27) | 0.303        | 1.09 (0.93, 1.28) | 0.284        |                   |              |                   |              |
|                                      | High genetic risk         | 1.07 (0.88, 1.29) | 0.494        | 1.07 (0.89, 1.30) | 0.459        |                   |              |                   |              |
| Peptic ulcer                         | Intermediate genetic risk | 1.02 (0.95, 1.09) | 0.611        | 1.02 (0.95, 1.10) | 0.587        |                   |              |                   |              |
|                                      | High genetic risk         | 1.06 (0.97, 1.15) | 0.226        | 1.05 (0.97, 1.15) | 0.234        |                   |              |                   |              |
| Crohn's disease                      | Intermediate genetic risk | 0.92 (0.76, 1.11) | 0.394        | 0.92 (0.76, 1.12) | 0.409        |                   |              |                   |              |
|                                      | High genetic risk         | 1.03 (0.82, 1.30) | 0.789        | 1.03 (0.82, 1.30) | 0.772        |                   |              |                   |              |
| Ulcerative colitis                   | Intermediate genetic risk | 0.94 (0.82, 1.07) | 0.333        | 0.94 (0.83, 1.07) | 0.364        |                   |              |                   |              |
|                                      | High genetic risk         | 0.87 (0.74, 1.03) | 0.103        | 0.88 (0.74, 1.03) | 0.116        |                   |              |                   |              |

|                                             |                                  |                   |              |                   |              |
|---------------------------------------------|----------------------------------|-------------------|--------------|-------------------|--------------|
| <b>Irritable bowel syndrome</b>             | <b>Intermediate genetic risk</b> | 1.04 (0.96, 1.11) | 0.336        | 1.04 (0.97, 1.11) | 0.327        |
|                                             | <b>High genetic risk</b>         | 1.00 (0.92, 1.09) | 0.992        | 1.00 (0.92, 1.09) | 0.997        |
| <b>Diverticular disease</b>                 | <b>Intermediate genetic risk</b> | 1.00 (0.97, 1.03) | 0.860        | 1.00 (0.97, 1.03) | 0.923        |
|                                             | <b>High genetic risk</b>         | 0.96 (0.93, 1.00) | <b>0.042</b> | 0.96 (0.93, 1.00) | <b>0.047</b> |
| <b>Pancreatitis</b>                         | <b>Intermediate genetic risk</b> | 1.08 (0.95, 1.23) | 0.267        | 1.08 (0.95, 1.23) | 0.266        |
|                                             | <b>High genetic risk</b>         | 1.01 (0.86, 1.18) | 0.935        | 1.00 (0.85, 1.18) | 0.971        |
| <b>Non-alcoholic fatty liver disease</b>    | <b>Intermediate genetic risk</b> | 1.12 (1.02, 1.22) | <b>0.012</b> | 1.12 (1.02, 1.22) | <b>0.013</b> |
|                                             | <b>High genetic risk</b>         | 1.11 (1.00, 1.23) | 0.057        | 1.10 (0.99, 1.22) | 0.090        |
| <b>Liver cirrhosis</b>                      | <b>Intermediate genetic risk</b> | 1.08 (0.95, 1.21) | 0.242        | 1.08 (0.96, 1.22) | 0.221        |
|                                             | <b>High genetic risk</b>         | 1.03 (0.89, 1.20) | 0.664        | 1.03 (0.89, 1.20) | 0.653        |
| <b>Biliary disease</b>                      | <b>Intermediate genetic risk</b> | 1.02 (0.97, 1.07) | 0.363        | 1.02 (0.97, 1.07) | 0.417        |
|                                             | <b>High genetic risk</b>         | 1.02 (0.96, 1.08) | 0.526        | 1.01 (0.95, 1.07) | 0.725        |
| <b>Gastrointestinal tract cancers</b>       | <b>Intermediate genetic risk</b> | 0.99 (0.93, 1.05) | 0.715        | 0.99 (0.93, 1.06) | 0.760        |
|                                             | <b>High genetic risk</b>         | 1.05 (0.97, 1.14) | 0.204        | 1.05 (0.97, 1.14) | 0.189        |
| <b>Hepatobiliary and pancreatic cancers</b> | <b>Intermediate genetic risk</b> | 1.07 (0.94, 1.22) | 0.290        | 1.07 (0.94, 1.22) | 0.282        |
|                                             | <b>High genetic risk</b>         | 1.08 (0.93, 1.27) | 0.303        | 1.08 (0.93, 1.26) | 0.307        |

Minimally adjusted model: logistic models adjusted for age, sex, Townsend deprivation index, education. Fully adjusted model: logistic models adjusted for age, sex, Townsend deprivation index, education, body mass index (except for BMI related PRS), smoking status, drinking status, physical activity, and adherence to a healthy diet.

The low genetic risk group was the reference group.

PRS, polygenetic risk score; OR, odd ratio; CI, confidence interval; GLP-1, glucagon-like peptide-1; GIP, glucose-dependent insulinotropic polypeptide; TG, triglyceride; TC total cholesterol; LDL-C, low-density lipoprotein cholesterol; HDL-C, high-density lipoprotein cholesterol; GGT gamma-glutamyl transferase; AST aspartate aminotransferase; ALT alanine transaminase; ALP alkaline phosphatase

P<0.05/15 after Bonferroni correction was considered significant. P value with bolded black Indicated <0.05 and >0.05/15 and P value with bolded red indicated <0.05/15.

**Supplementary table 8 Adjusted hazard ratios for incident gastrointestinal diseases according to diabetes duration of baseline type 2 diabetes**

| <b>Disease</b>                  | <b>Diabetes duration</b> | <b>Cases/Person-years <sup>a</sup></b> | <b>HR (95% CI)</b> | <b>P-value</b> | <b>P for trend</b> |
|---------------------------------|--------------------------|----------------------------------------|--------------------|----------------|--------------------|
| Barrett's esophagus             | 0-5 years                | 103/89015                              | 1.10 (0.90, 1.34)  | 0.348          | 0.006              |
|                                 | 5-10 years               | 87/52572                               | 1.46 (1.18, 1.81)  | 0.001          |                    |
|                                 | >10 years                | 52/39420                               | 1.13 (0.86, 1.50)  | 0.377          |                    |
| Gastroesophageal reflux disease | 0-5 years                | 701/85917                              | 0.98 (0.91, 1.06)  | 0.672          | <0.001             |
|                                 | 5-10 years               | 494/50291                              | 1.15 (1.05, 1.25)  | 0.003          |                    |
|                                 | >10 years                | 385/37606                              | 1.19 (1.08, 1.32)  | 0.001          |                    |
| Gastritis and duodenitis        | 0-5 years                | 869/84958                              | 1.51 (1.41, 1.61)  | <0.001         | <0.001             |
|                                 | 5-10 years               | 611/49904                              | 1.74 (1.61, 1.89)  | <0.001         |                    |
|                                 | >10 years                | 490/37086                              | 1.84 (1.68, 2.02)  | <0.001         |                    |
| Celiac disease                  | 0-5 years                | 11/89418                               | 0.64 (0.35, 1.16)  | 0.138          | 0.020              |
|                                 | 5-10 years               | 16/52834                               | 1.57 (0.95, 2.59)  | 0.077          |                    |
|                                 | >10 years                | 15/39567                               | 1.92 (1.14, 3.21)  | 0.013          |                    |
| Peptic ulcer                    | 0-5 years                | 233/88344                              | 1.54 (1.34, 1.76)  | <0.001         | <0.001             |
|                                 | 5-10 years               | 153/52221                              | 1.61 (1.37, 1.90)  | <0.001         |                    |
|                                 | >10 years                | 131/39080                              | 1.78 (1.49, 2.12)  | <0.001         |                    |
| Crohn's disease                 | 0-5 years                | 18/89402                               | 1.07 (0.66, 1.72)  | 0.779          | 0.028              |
|                                 | 5-10 years               | 14/52863                               | 1.40 (0.82, 2.40)  | 0.216          |                    |
|                                 | >10 years                | 13/39568                               | 1.75 (1.00, 3.05)  | 0.050          |                    |
| Ulcerative colitis              | 0-5 years                | 35/89339                               | 1.01 (0.72, 1.42)  | 0.969          | 0.283              |
|                                 | 5-10 years               | 25/52789                               | 1.20 (0.80, 1.79)  | 0.377          |                    |
|                                 | >10 years                | 19/39548                               | 1.20 (0.76, 1.90)  | 0.428          |                    |

|                                      |            |            |                   |        |        |
|--------------------------------------|------------|------------|-------------------|--------|--------|
| Irritable bowel syndrome             | 0-5 years  | 105/88900  | 1.07 (0.88, 1.30) | 0.523  | 0.079  |
|                                      | 5-10 years | 70/52518   | 1.24 (0.98, 1.57) | 0.079  |        |
|                                      | >10 years  | 47/39402   | 1.12 (0.84, 1.50) | 0.428  |        |
| Diverticulum                         | 0-5 years  | 1054/83966 | 1.25 (1.17, 1.33) | <0.001 | <0.001 |
|                                      | 5-10 years | 671/49434  | 1.27 (1.18, 1.37) | <0.001 |        |
|                                      | >10 years  | 440/37374  | 1.11 (1.01, 1.22) | 0.027  |        |
| Pancreatitis                         | 0-5 years  | 78/89178   | 1.53 (1.21, 1.93) | <0.001 | <0.001 |
|                                      | 5-10 years | 40/52762   | 1.24 (0.90, 1.71) | 0.182  |        |
|                                      | >10 years  | 41/39519   | 1.67 (1.22, 2.29) | 0.002  |        |
| Non-alcoholic fatty liver disease    | 0-5 years  | 317/87879  | 2.52 (2.23, 2.85) | <0.001 | <0.001 |
|                                      | 5-10 years | 197/52024  | 2.61 (2.25, 3.04) | <0.001 |        |
|                                      | >10 years  | 123/39089  | 2.17 (1.80, 2.61) | <0.001 |        |
| Liver cirrhosis                      | 0-5 years  | 154/88987  | 2.91 (2.45, 3.46) | <0.001 | <0.001 |
|                                      | 5-10 years | 112/52549  | 3.40 (2.79, 4.15) | <0.001 |        |
|                                      | >10 years  | 72/39439   | 2.84 (2.22, 3.62) | <0.001 |        |
| Biliary disease                      | 0-5 years  | 412/87493  | 1.15 (1.04, 1.27) | 0.008  | <0.001 |
|                                      | 5-10 years | 241/51880  | 1.10 (0.96, 1.25) | 0.159  |        |
|                                      | >10 years  | 241/38662  | 1.52 (1.33, 1.73) | <0.001 |        |
| Gastrointestinal cancers             | 0-5 years  | 228/88650  | 1.26 (1.10, 1.44) | 0.001  | <0.001 |
|                                      | 5-10 years | 173/52293  | 1.50 (1.28, 1.75) | <0.001 |        |
|                                      | >10 years  | 109/39274  | 1.24 (1.02, 1.50) | 0.031  |        |
| Hepatobiliary and pancreatic cancers | 0-5 years  | 109/89380  | 2.37 (1.94, 2.90) | <0.001 | <0.001 |

---

|            |          |                   |        |
|------------|----------|-------------------|--------|
| 5-10 years | 68/52847 | 2.28 (1.78, 2.93) | <0.001 |
| >10 years  | 54/39596 | 2.34 (1.77, 3.09) | <0.001 |

---

<sup>a</sup> Excluding individuals with type 2 diabetes without information of duration (n=3602).

Analyses used age-scaled models adjusting for sex, Townsend deprivation index, education, ethnicity, body mass index, smoking status, drinking status, physical activity, and adherence to a healthy diet. The non-type 2 diabetes group was set as the reference. HR-hazard ratio, CI-confidence interval.

**Supplementary table 9 Adjusted hazard ratios for incident gastrointestinal diseases according to HbA1c level of baseline type 2 diabetes**

| <b>Diseases</b>                 | <b>Baseline HbA1c level</b> | <b>Cases/Person-years <sup>a</sup></b> | <b>HR (95% CI)</b> | <b>P-value</b> |
|---------------------------------|-----------------------------|----------------------------------------|--------------------|----------------|
| Barrett's esophagus             | <53 mmol/mol                | 167/129170                             | 1.21 (1.03, 1.42)  | 0.019          |
|                                 | ≥53 mmol/mol                | 88/76500                               | 1.07 (0.86, 1.33)  | 0.528          |
| Gastroesophageal reflux disease | <53 mmol/mol                | 1106/124202                            | 1.08 (1.01, 1.15)  | 0.017          |
|                                 | ≥53 mmol/mol                | 608/73655                              | 0.98 (0.91, 1.07)  | 0.700          |
| Gastritis and duodenitis        | <53 mmol/mol                | 1304/123110                            | 1.55 (1.46, 1.64)  | <0.001         |
|                                 | ≥53 mmol/mol                | 798/72920                              | 1.59 (1.48, 1.71)  | <0.001         |
| Celiac disease                  | <53 mmol/mol                | 36/129694                              | 1.38 (0.99, 1.94)  | 0.060          |
|                                 | ≥53 mmol/mol                | 13/76808                               | 0.90 (0.52, 1.56)  | 0.696          |
| Peptic ulcer                    | <53 mmol/mol                | 335/128308                             | 1.52 (1.35, 1.70)  | <0.001         |
|                                 | ≥53 mmol/mol                | 223/75837                              | 1.67 (1.45, 1.92)  | <0.001         |
| Crohn's disease                 | <53 mmol/mol                | 27/129765                              | 1.12 (0.75, 1.65)  | 0.585          |
|                                 | ≥53 mmol/mol                | 24/76749                               | 1.62 (1.07, 2.46)  | 0.024          |
| Ulcerative colitis              | <53 mmol/mol                | 53/129621                              | 1.06 (0.80, 1.40)  | 0.699          |
|                                 | ≥53 mmol/mol                | 35/76678                               | 1.15 (0.81, 1.61)  | 0.433          |
| Irritable bowel syndrome        | <53 mmol/mol                | 164/128934                             | 1.14 (0.97, 1.34)  | 0.105          |
|                                 | ≥53 mmol/mol                | 80/76449                               | 0.97 (0.77, 1.21)  | 0.778          |
| Diverticulum                    | <53 mmol/mol                | 1544/121851                            | 1.24 (1.18, 1.31)  | <0.001         |
|                                 | ≥53 mmol/mol                | 796/72752                              | 1.09 (1.01, 1.17)  | 0.026          |
| Pancreatitis                    | <53 mmol/mol                | 104/129474                             | 1.42 (1.16, 1.75)  | 0.001          |
|                                 | ≥53 mmol/mol                | 72/76608                               | 1.58 (1.24, 2.02)  | <0.001         |
| Non-alcoholic fatty liver       | <53 mmol/mol                | 408/127824                             | 2.38 (2.14, 2.66)  | <0.001         |



|                                     |              |            |                   |        |
|-------------------------------------|--------------|------------|-------------------|--------|
| disease                             |              |            |                   |        |
|                                     | ≥53 mmol/mol | 288/75563  | 2.52 (2.22, 2.86) | <0.001 |
| Liver cirrhosis                     | <53 mmol/mol | 200/129218 | 2.64 (2.26, 3.08) | <0.001 |
|                                     | ≥53 mmol/mol | 156/76380  | 3.26 (2.74, 3.89) | <0.001 |
| Biliary disease                     | <53 mmol/mol | 611/126948 | 1.19 (1.10, 1.30) | <0.001 |
|                                     | ≥53 mmol/mol | 365/75245  | 1.15 (1.03, 1.28) | 0.010  |
| Gastrointestinal<br>cancers         | tract        |            |                   |        |
|                                     | <53 mmol/mol | 357/128525 | 1.33 (1.19, 1.49) | <0.001 |
|                                     | ≥53 mmol/mol | 183/76332  | 1.16 (1.00, 1.35) | 0.049  |
| Hepatobiliary<br>pancreatic cancers | and          |            |                   |        |
|                                     | <53 mmol/mol | 151/129706 | 2.19 (1.84, 2.61) | <0.001 |
|                                     | ≥53 mmol/mol | 104/76757  | 2.61 (2.12, 3.22) | <0.001 |

<sup>a</sup> Excluding individuals with type 2 diabetes without information of baseline HbA1c level (n=1448).

Analyses used age-scaled models adjusting for sex, Townsend deprivation index, education, ethnicity, body mass index, smoking status, drinking status, physical activity, and adherence to a healthy diet. The non-type 2 diabetes group was set as the reference. HR-hazard ratio, CI-confidence interval.

**Supplementary table 10 Adjusted hazard ratios for incident gastrointestinal diseases according to use of diabetes medication**

| <b>Diseases</b>                 | <b>Diabetes medication use</b> | <b>Cases/Person-years <sup>a</sup></b> | <b>HR (95% CI)</b> | <b>P-value</b> |
|---------------------------------|--------------------------------|----------------------------------------|--------------------|----------------|
| Barrett's esophagus             | No                             | 105/101196                             | 1.01 (0.79, 1.28)  | 0.962          |
|                                 | Yes                            | 177/121010                             | 1.33 (1.13, 1.56)  | <0.001         |
| Gastroesophageal reflux disease | No                             | 771/97727                              | 1.04 (0.95, 1.13)  | 0.405          |
|                                 | Yes                            | 1089/116034                            | 1.10 (1.03, 1.17)  | 0.004          |
| Gastritis and duodenitis        | No                             | 878/97157                              | 1.42 (1.31, 1.55)  | <0.001         |
|                                 | Yes                            | 1415/114536                            | 1.77 (1.67, 1.88)  | <0.001         |
| Celiac disease                  | No                             | 25/101477                              | 1.02 (0.59, 1.78)  | 0.935          |
|                                 | Yes                            | 31/121640                              | 1.28 (0.88, 1.87)  | 0.197          |
| Peptic ulcer                    | No                             | 225/100610                             | 1.43 (1.22, 1.68)  | <0.001         |
|                                 | Yes                            | 372/120017                             | 1.71 (1.53, 1.91)  | <0.001         |
| Crohn's disease                 | No                             | 25/101477                              | 1.12 (0.64, 1.95)  | 0.697          |
|                                 | Yes                            | 32/121650                              | 1.42 (0.98, 2.05)  | 0.063          |
| Ulcerative colitis              | No                             | 39/101395                              | 0.98 (0.65, 1.48)  | 0.933          |
|                                 | Yes                            | 55/121541                              | 1.17 (0.89, 1.55)  | 0.266          |
| Irritable bowel syndrome        | No                             | 131/100866                             | 1.20 (0.96, 1.50)  | 0.102          |
|                                 | Yes                            | 145/120992                             | 1.09 (0.92, 1.29)  | 0.336          |
| Diverticulum                    | No                             | 1093/95848                             | 1.23 (1.14, 1.32)  | <0.001         |
|                                 | Yes                            | 1424/114482                            | 1.22 (1.15, 1.29)  | <0.001         |
| Pancreatitis                    | No                             | 66/101305                              | 1.13 (0.83, 1.55)  | 0.437          |
|                                 | Yes                            | 121/121373                             | 1.65 (1.35, 2.01)  | <0.001         |
| Non-alcoholic fatty liver       | No                             | 307/100169                             | 2.35 (2.03, 2.73)  | <0.001         |

---

|                                     |       |            |  |                   |        |
|-------------------------------------|-------|------------|--|-------------------|--------|
| disease                             |       |            |  |                   |        |
|                                     | Yes   | 450/119595 |  | 2.53 (2.27, 2.82) | <0.001 |
| Liver cirrhosis                     | No    | 152/101111 |  | 2.80 (2.28, 3.44) | <0.001 |
|                                     | Yes   | 237/121027 |  | 3.17 (2.73, 3.68) | <0.001 |
| Biliary disease                     | No    | 440/99405  |  | 1.19 (1.06, 1.34) | 0.003  |
|                                     | Yes   | 614/119096 |  | 1.22 (1.12, 1.33) | <0.001 |
| Gastrointestinal<br>cancers         | tract |            |  |                   |        |
|                                     | No    | 254/100650 |  | 1.25 (1.09, 1.42) | 0.001  |
|                                     | Yes   | 331/120671 |  | 1.29 (1.14, 1.45) | <0.001 |
| Hepatobiliary<br>pancreatic cancers | and   |            |  |                   |        |
|                                     | No    | 97/101468  |  | 1.91 (1.54, 2.37) | <0.001 |
|                                     | Yes   | 174/121629 |  | 2.71 (2.28, 3.22) | <0.001 |

---

<sup>a</sup> Excluding individuals with type 2 diabetes without information of baseline HbA1c level (n=1448).

Analyses used age-scaled models adjusting for sex, Townsend deprivation index, education, ethnicity, body mass index, smoking status, drinking status, physical activity, and adherence to a healthy diet. The non-type 2 diabetes group was set as the reference. HR-hazard ratio, CI-confidence interval.

**Supplementary table 11 Adjusted hazard ratios for incident gastrointestinal diseases according to baseline type 2 diabetes stratified by age, sex, body mass index, smoking status, and drinking status**

| Diseases                          | Age ≤60 years     |          | Age >60 years     |          | P-<br>interaction | Female            |         | Male              |         | P-<br>interaction |
|-----------------------------------|-------------------|----------|-------------------|----------|-------------------|-------------------|---------|-------------------|---------|-------------------|
|                                   | HR (95% CI)       | P-value  | HR (95% CI)       | P-value  |                   | HR (95% CI)       | P-value | HR (95% CI)       | P-value |                   |
| Barrett's esophagus               | 1.26 (1.03, 1.55) | 0.026*   | 1.18 (1.00, 1.39) | 0.049*   | 0.66              | 1.20 (0.93, 1.54) | 0.166   | 1.22 (1.05, 1.42) | 0.008   | 0.47              |
| Gastroesophageal reflux disease   | 1.05 (0.98, 1.13) | 0.160    | 1.06 (1.00, 1.14) | 0.068    | 0.20              | 0.99 (0.92, 1.07) | 0.885   | 1.13 (1.06, 1.21) | <0.001  | 0.84              |
| Gastritis and duodenitis          | 1.57 (1.46, 1.68) | <0.001** | 1.58 (1.48, 1.68) | <0.001** | 0.75              | 1.52 (1.42, 1.64) | <0.001  | 1.64 (1.54, 1.74) | <0.001  | 0.69              |
| Celiac disease                    | 1.28 (0.86, 1.90) | 0.224    | 1.34 (0.91, 1.98) | 0.144    | 0.81              | 1.26 (0.83, 1.92) | 0.280   | 1.41 (0.97, 2.05) | 0.069   | 0.67              |
| Peptic ulcer                      | 1.69 (1.46, 1.94) | <0.001** | 1.48 (1.31, 1.66) | <0.001** | 0.16              | 1.57 (1.34, 1.84) | <0.001  | 1.56 (1.40, 1.75) | <0.001  | 0.68              |
| Crohn's disease                   | 1.48 (1.00, 2.18) | 0.050    | 1.23 (0.81, 1.86) | 0.336    | 0.39              | 1.46 (0.92, 2.31) | 0.110   | 1.29 (0.90, 1.86) | 0.167   | 0.77              |
| Ulcerative colitis                | 0.95 (0.68, 1.33) | 0.769    | 1.20 (0.90, 1.61) | 0.216    | 0.43              | 1.40 (0.98, 1.98) | 0.061   | 0.92 (0.70, 1.22) | 0.572   | 0.13              |
| Irritable bowel syndrome          | 1.26 (1.07, 1.48) | 0.005*   | 0.99 (0.81, 1.21) | 0.929    | 0.01              | 1.24 (1.06, 1.45) | 0.009   | 0.99 (0.80, 1.22) | 0.933   | 0.04              |
| Diverticulum                      | 1.05 (0.98, 1.13) | 0.157    | 1.30 (1.23, 1.37) | <0.001** | 0.01              | 1.17 (1.09, 1.26) | <0.001  | 1.20 (1.14, 1.27) | <0.001  | 0.94              |
| Pancreatitis                      | 1.37 (1.06, 1.77) | 0.015*   | 1.53 (1.23, 1.89) | <0.001** | 0.47              | 0.97 (0.72, 1.31) | 0.841   | 1.81 (1.49, 2.21) | <0.001  | <0.01             |
| Non-alcoholic fatty liver disease | 2.56 (2.28, 2.87) | <0.001** | 2.43 (2.12, 2.79) | <0.001** | 0.61              | 2.55 (2.22, 2.93) | <0.001  | 2.44 (2.17, 2.74) | <0.001  | 0.23              |
| Cirrhosis                         | 3.18 (2.65, 3.82) | <0.001** | 2.74 (2.32, 3.23) | <0.001** | 0.57              | 3.50 (2.76, 4.42) | <0.001  | 2.69 (2.32, 3.11) | <0.001  | 0.29              |
| Biliary disease                   | 1.13 (1.02, 1.25) | 0.015*   | 1.22 (1.12, 1.34) | <0.001** | 0.40              | 1.02 (0.92, 1.12) | 0.709   | 1.36 (1.24, 1.49) | <0.001  | <0.01             |
| Gastrointestinal tract cancers    | 1.44 (1.24, 1.68) | <0.001** | 1.20 (1.08, 1.35) | 0.001**  | 0.02              | 1.17 (0.98, 1.40) | 0.091   | 1.28 (1.15, 1.42) | <0.001  | 0.03              |

| Hepatobiliary and pancreatic cancers |                   |          |                   |          |                   |                   |          |                   |          |                   |
|--------------------------------------|-------------------|----------|-------------------|----------|-------------------|-------------------|----------|-------------------|----------|-------------------|
| Diseases                             | Non-obesity       |          | Obesity           |          | P-<br>interaction | Ever smoker       |          | Non smoker        |          | P-<br>interaction |
|                                      | HR (95% CI)       | P-value  | HR (95% CI)       | P-value  |                   | HR (95% CI)       | P-value  | HR (95% CI)       | P-value  |                   |
|                                      | 2.29 (1.77, 2.97) | <0.001** | 2.34 (1.98, 2.77) | <0.001** | 0.72              | 2.00 (1.54, 2.60) | <0.001   | 2.42 (2.04, 2.86) | <0.001   | 0.06              |
| Barrett's esophagus                  | 1.42 (1.19, 1.68) | <0.001** | 1.12 (0.92, 1.35) | 0.254    | 0.01              | 1.27 (1.08, 1.50) | 0.004*   | 1.09 (0.89, 1.35) | 0.409    | 0.35              |
| Gastroesophageal reflux disease      | 1.21 (1.12, 1.29) | <0.001** | 1.06 (0.99, 1.13) | 0.093    | <0.01             | 1.06 (0.99, 1.13) | 0.092    | 1.04 (0.97, 1.12) | 0.296    | 0.92              |
| Gastritis and duodenitis             | 1.59 (1.49, 1.69) | <0.001** | 1.64 (1.54, 1.75) | <0.001** | 0.62              | 1.59 (1.50, 1.69) | <0.001** | 1.58 (1.47, 1.69) | <0.001** | 0.35              |
| Celiac disease                       | 1.33 (0.94, 1.87) | 0.103    | 0.95 (0.60, 1.51) | 0.830    | 0.15              | 1.12 (0.75, 1.68) | 0.568    | 1.46 (0.99, 2.15) | 0.053    | 0.64              |
| Peptic ulcer                         | 1.58 (1.39, 1.80) | <0.001** | 1.67 (1.47, 1.89) | <0.001** | 0.58              | 1.53 (1.36, 1.72) | <0.001** | 1.62 (1.41, 1.86) | <0.001** | 0.23              |
| Crohn's disease                      | 1.20 (0.78, 1.86) | 0.401    | 1.47 (1.01, 2.14) | 0.045*   | 0.63              | 1.29 (0.89, 1.85) | 0.175    | 1.42 (0.90, 2.26) | 0.136    | 0.72              |
| Ulcerative colitis                   | 1.07 (0.79, 1.45) | 0.666    | 1.09 (0.80, 1.49) | 0.565    | 0.91              | 1.00 (0.75, 1.32) | 0.977    | 1.21 (0.87, 1.70) | 0.261    | 0.38              |
| Irritable bowel syndrome             | 0.96 (0.79, 1.17) | 0.683    | 1.26 (1.07, 1.49) | 0.006*   | 0.07              | 1.20 (1.01, 1.42) | 0.039*   | 1.04 (0.86, 1.26) | 0.665    | 0.12              |
| Diverticulum                         | 1.31 (1.23, 1.39) | <0.001** | 1.22 (1.15, 1.29) | <0.001** | 0.01              | 1.20 (1.14, 1.27) | <0.001** | 1.18 (1.10, 1.26) | <0.001** | 0.74              |
| Pancreatitis                         | 2.00 (1.58, 2.52) | <0.001** | 1.38 (1.11, 1.72) | 0.003**  | 0.01              | 1.67 (1.36, 2.07) | <0.001** | 1.22 (0.94, 1.57) | 0.138    | 0.24              |
| Non-alcoholic fatty liver disease    | 3.40 (2.95, 3.93) | <0.001** | 2.67 (2.40, 2.97) | <0.001** | <0.01             | 2.31 (2.05, 2.60) | <0.001** | 2.68 (2.35, 3.06) | <0.001** | 0.02              |
| Liver cirrhosis                      | 2.36 (1.94, 2.88) | <0.001** | 3.54 (3.02, 4.15) | <0.001** | <0.01             | 2.89 (2.47, 3.38) | <0.001** | 3.02 (2.48, 3.68) | <0.001** | 0.22              |
| Biliary disease                      | 1.61 (1.45, 1.78) | <0.001** | 1.26 (1.16, 1.38) | <0.001** | <0.01             | 1.24 (1.13, 1.36) | <0.001** | 1.11 (1.01, 1.23) | 0.031*   | 0.18              |
| Gastrointestinal tract cancers       | 1.36 (1.20, 1.55) | <0.001** | 1.26 (1.12, 1.43) | <0.001** | 0.46              | 1.28 (1.14, 1.43) | <0.001** | 1.10 (0.95, 1.28) | 0.185    | 0.72              |

| Hepatobiliary and pancreatic cancers |                   |          |                     |          |               |                   |          |                   |          |               |
|--------------------------------------|-------------------|----------|---------------------|----------|---------------|-------------------|----------|-------------------|----------|---------------|
|                                      | 2.29 (1.87, 2.80) | <0.001** | 2.40 (1.98, 2.91)   | <0.001** | 0.75          | 2.41 (2.02, 2.89) | <0.001** | 2.10 (1.67, 2.64) | <0.001** | 0.27          |
| Diseases                             | Current drinker   |          | Non-current drinker |          | P-interaction | Without PPI use   |          | With PPI use      |          | P-interaction |
|                                      | HR (95% CI)       | P-value  | HR (95% CI)         | P-value  |               | HR (95% CI)       | P-value  | HR (95% CI)       | P-value  |               |
| Barrett's esophagus                  | 1.21 (1.06, 1.39) | 0.005    | 1.13 (0.76, 1.68)   | 0.548    | 0.24          | 1.15 (1.00, 1.33) | 0.050    | 1.14 (0.84, 1.55) | 0.406    | 0.09          |
| Gastroesophageal reflux disease      | 1.03 (0.98, 1.09) | 0.214    | 1.14 (1.01, 1.29)   | 0.040*   | 0.34          | 1.01 (0.96, 1.07) | 0.651    | 0.93 (0.83, 1.05) | 0.236    | <0.001        |
| Gastritis and duodenitis             | 1.60 (1.53, 1.69) | <0.001** | 1.49 (1.32, 1.67)   | <0.001** | 0.04          | 1.54 (1.46, 1.61) | <0.001** | 1.57 (1.39, 1.77) | <0.001** | <0.01         |
| Celiac disease                       | 1.35 (1.01, 1.81) | 0.045    | 1.01 (0.42, 2.40)   | 0.985    | 0.32          | 1.25 (0.93, 1.69) | 0.133    | 1.55 (0.67, 3.62) | 0.308    | 0.70          |
| Peptic ulcer                         | 1.55 (1.40, 1.71) | <0.001** | 1.73 (1.37, 2.18)   | <0.001** | 0.61          | 1.55 (1.41, 1.71) | <0.001** | 1.43 (1.10, 1.85) | 0.008*   | 0.01          |
| Crohn's disease                      | 1.28 (0.94, 1.75) | 0.117    | 1.89 (0.93, 3.86)   | 0.080    | 0.51          | 1.32 (0.98, 1.79) | 0.072    | 1.50 (0.67, 3.36) | 0.319    | 0.78          |
| Ulcerative colitis                   | 1.03 (0.81, 1.31) | 0.793    | 1.47 (0.85, 2.56)   | 0.169    | 0.57          | 1.05 (0.84, 1.33) | 0.654    | 1.18 (0.61, 2.29) | 0.614    | 0.79          |
| Irritable bowel syndrome             | 1.12 (0.98, 1.29) | 0.108    | 1.09 (0.81, 1.48)   | 0.566    | 0.93          | 1.04 (0.90, 1.19) | 0.601    | 1.24 (0.93, 1.67) | 0.145    | 0.47          |
| Diverticulum                         | 1.18 (1.13, 1.24) | <0.001** | 1.24 (1.09, 1.41)   | 0.001**  | 0.95          | 1.18 (1.13, 1.23) | <0.001** | 1.09 (0.96, 1.24) | 0.169    | 0.01          |
| Pancreatitis                         | 1.44 (1.20, 1.71) | <0.001** | 1.66 (1.09, 2.54)   | 0.018    | 0.67          | 1.37 (1.15, 1.64) | <0.001** | 1.62 (1.07, 2.43) | 0.022*   | 0.61          |
| Non-alcoholic fatty liver disease    | 2.38 (2.16, 2.62) | <0.001** | 3.09 (2.47, 3.88)   | <0.001** | 0.86          | 2.43 (2.21, 2.67) | <0.001** | 2.46 (1.88, 3.21) | <0.001** | 0.02          |
| Liver cirrhosis                      | 2.88 (2.53, 3.28) | <0.001** | 3.35 (2.33, 4.82)   | <0.001** | 1.00          | 2.81 (2.47, 3.21) | <0.001** | 3.25 (2.27, 4.65) | <0.001** | 0.62          |
| Biliary disease                      | 1.18 (1.10, 1.27) | <0.001** | 1.22 (1.03, 1.45)   | 0.021*   | 0.19          | 1.17 (1.09, 1.26) | <0.001** | 1.08 (0.89, 1.30) | 0.447    | 0.01          |
| Gastrointestinal                     | 1.33 (1.21, 1.46) | <0.001** | 0.99 (0.74, 1.34)   | 0.961    | <0.01         | 1.28 (1.17, 1.41) | <0.001** | 1.25 (0.91, 1.72) | 0.160    | 0.67          |

---

tract cancers

Hepatobiliary and  
pancreatic

|         |                   |          |                   |          |      |                   |          |                   |          |      |
|---------|-------------------|----------|-------------------|----------|------|-------------------|----------|-------------------|----------|------|
| cancers | 2.25 (1.93, 2.62) | <0.001** | 2.85 (1.92, 4.23) | <0.001** | 0.37 | 2.31 (1.99, 2.68) | <0.001** | 2.30 (1.44, 3.67) | <0.001** | 0.69 |
|---------|-------------------|----------|-------------------|----------|------|-------------------|----------|-------------------|----------|------|

---

Analyses used age-scaled models adjusting for sex, Townsend deprivation index, education, ethnicity, body mass index, smoking status, drinking status, physical activity, and adherence to a healthy diet. The non-type 2 diabetes group was set as the reference. HR-hazard ratio, CI-confidence interval.

P<0.05/15 after Bonferroni correction was considered significant. \* Indicated the P value<0.05 and >0.05/15 and \*\* indicated the P value<0.05/15.

**Supplementary table 12 Adjusted hazard ratios for incident gastrointestinal diseases according to baseline type 2 diabetes (new definition of type 2 diabetes)**

| Locations                       | Diseases                             | Medical records or self-report + abnormal blood glucose/abnormal HbA1c/use of anti-diabetes drugs |         | ICD codes use E11 instead of E11-E14 |         |
|---------------------------------|--------------------------------------|---------------------------------------------------------------------------------------------------|---------|--------------------------------------|---------|
|                                 |                                      | HR (95% CI)                                                                                       | P-value | HR (95% CI)                          | P-value |
| <b>Esophagus</b>                | Barrett's esophagus                  | 1.26 (1.08, 1.46)                                                                                 | 0.003   | 1.19 (1.05, 1.36)                    | 0.007   |
|                                 | Gastroesophageal reflux disease      | 1.08 (1.02, 1.15)                                                                                 | 0.011   | 1.05 (1.00, 1.10)                    | 0.061   |
| <b>Stomach and bowel</b>        | Gastritis and duodenitis             | 1.73 (1.64, 1.83)                                                                                 | <0.001  | 1.58 (1.51, 1.65)                    | <0.001  |
|                                 | Celiac disease                       | 1.24 (0.87, 1.77)                                                                                 | 0.238   | 1.28 (0.96, 1.69)                    | 0.088   |
|                                 | Peptic ulcer                         | 1.69 (1.52, 1.88)                                                                                 | <0.001  | 1.56 (1.42, 1.71)                    | <0.001  |
|                                 | Crohn's disease                      | 1.40 (0.99, 1.98)                                                                                 | 0.055   | 1.35 (1.02, 1.80)                    | 0.037   |
|                                 | Ulcerative colitis                   | 1.16 (0.89, 1.50)                                                                                 | 0.267   | 1.08 (0.87, 1.35)                    | 0.479   |
|                                 | Irritable bowel syndrome             | 1.07 (0.91, 1.26)                                                                                 | 0.402   | 1.12 (0.99, 1.27)                    | 0.068   |
|                                 | Diverticulum                         | 1.22 (1.16, 1.28)                                                                                 | <0.001  | 1.18 (1.13, 1.24)                    | <0.001  |
| <b>Pancreas</b>                 | Pancreatitis                         | 1.64 (1.36, 1.98)                                                                                 | <0.001  | 1.45 (1.23, 1.71)                    | <0.001  |
| <b>Liver</b>                    | Non-alcoholic fatty liver disease    | 2.45 (2.21, 2.72)                                                                                 | <0.001  | 2.46 (2.25, 2.69)                    | <0.001  |
|                                 | Liver cirrhosis                      | 3.10 (2.69, 3.57)                                                                                 | <0.001  | 2.93 (2.59, 3.31)                    | <0.001  |
| <b>Gallbladder and biliary</b>  | Biliary disease                      | 1.20 (1.11, 1.30)                                                                                 | <0.001  | 1.18 (1.10, 1.26)                    | <0.001  |
| <b>Gastrointestinal cancers</b> | Gastrointestinal tract cancers       | 1.30 (1.17, 1.45)                                                                                 | <0.001  | 1.27 (1.16, 1.39)                    | <0.001  |
|                                 | Hepatobiliary and pancreatic cancers | 2.59 (2.20, 3.04)                                                                                 | <0.001  | 2.30 (2.00, 2.65)                    | <0.001  |

The new definition of type 2 diabetes (n=12405): ICD code diagnosis plus  $\geq 1$  the following: abnormal blood glucose, abnormal HbA1c, or use of anti-diabetes drugs at baseline. Analyses used age-scaled models adjusting for sex, Townsend deprivation index, education, ethnicity, body mass index, smoking status, drinking status, physical activity, and adherence to a healthy diet. The non-type 2 diabetes group was set as the reference. HR-hazard ratio, CI-confidence interval.



**Supplementary table 13 Adjusted hazard ratios for incident gastrointestinal diseases according to baseline type 2 diabetes in sensitive analyses**

| Locations                       | Diseases                          | Further adjusted for C-reactive protein |         | Further adjusted for INFLA-score |         | Further adjusted for proton pump inhibitors |         |
|---------------------------------|-----------------------------------|-----------------------------------------|---------|----------------------------------|---------|---------------------------------------------|---------|
|                                 |                                   | HR (95% CI)                             | P-value | HR (95% CI)                      | P-value | HR (95% CI)                                 | P-value |
| <b>Esophagus</b>                | Barrett's esophagus               | 1.20 (1.05, 1.36)                       | 0.006   | 1.19 (1.04, 1.35)                | 0.009   | 1.13 (1.00, 1.29)                           | 0.059   |
|                                 | Gastroesophageal reflux disease   | 1.05 (1.00, 1.10)                       | 0.058   | 1.04 (0.99, 1.10)                | 0.098   | 0.99 (0.94, 1.04)                           | 0.578   |
| <b>Stomach and bowel</b>        | Gastritis and duodenitis          | 1.58 (1.51, 1.65)                       | <0.001  | 1.57 (1.50, 1.64)                | <0.001  | 1.53 (1.46, 1.60)                           | <0.001  |
|                                 | Celiac disease                    | 1.30 (0.98, 1.71)                       | 0.068   | 1.27 (0.96, 1.67)                | 0.094   | 1.28 (0.97, 1.69)                           | 0.082   |
|                                 | Peptic ulcer                      | 1.56 (1.43, 1.71)                       | <0.001  | 1.54 (1.41, 1.69)                | <0.001  | 1.52 (1.39, 1.66)                           | <0.001  |
|                                 | Crohn's disease                   | 1.35 (1.01, 1.79)                       | 0.040   | 1.31 (0.98, 1.74)                | 0.065   | 1.32 (0.99, 1.76)                           | 0.056   |
|                                 | Ulcerative colitis                | 1.08 (0.87, 1.34)                       | 0.510   | 1.05 (0.85, 1.31)                | 0.643   | 1.07 (0.86, 1.32)                           | 0.571   |
|                                 | Irritable bowel syndrome          | 1.12 (0.99, 1.27)                       | 0.081   | 1.11 (0.98, 1.26)                | 0.095   | 1.07 (0.94, 1.21)                           | 0.305   |
|                                 | Diverticulum                      | 1.19 (1.14, 1.24)                       | <0.001  | 1.18 (1.13, 1.23)                | <0.001  | 1.16 (1.12, 1.21)                           | <0.001  |
| <b>Pancreas</b>                 | Pancreatitis                      | 1.46 (1.24, 1.71)                       | <0.001  | 1.43 (1.22, 1.69)                | <0.001  | 1.41 (1.20, 1.66)                           | <0.001  |
| <b>Liver</b>                    | Non-alcoholic fatty liver disease | 2.46 (2.25, 2.69)                       | <0.001  | 2.44 (2.24, 2.67)                | <0.001  | 2.41 (2.21, 2.64)                           | <0.001  |
|                                 | Liver cirrhosis                   | 2.93 (2.59, 3.31)                       | <0.001  | 2.92 (2.58, 3.30)                | <0.001  | 2.86 (2.53, 3.24)                           | <0.001  |
| <b>Gallbladder and biliary</b>  | Biliary disease                   | 1.18 (1.10, 1.26)                       | <0.001  | 1.16 (1.09, 1.24)                | <0.001  | 1.15 (1.08, 1.23)                           | <0.001  |
| <b>Gastrointestinal cancers</b> | Gastrointestinal tract cancers    | 1.28 (1.17, 1.40)                       | <0.001  | 1.27 (1.16, 1.39)                | <0.001  | 1.29 (1.18, 1.41)                           | <0.001  |

|                                    | Hepatobiliary and<br>pancreatic cancers | 2.32 (2.02, 2.67)                                        | <0.001  | 2.30 (2.00, 2.64)                                           | <0.001  | 2.31 (2.00, 2.65) | <0.001 |
|------------------------------------|-----------------------------------------|----------------------------------------------------------|---------|-------------------------------------------------------------|---------|-------------------|--------|
| Locations                          | Diseases                                | Further adjusted for baseline<br>cardiovascular diseases |         | Further adjusted for<br>baseline metabolic<br>abnormalities |         |                   |        |
|                                    |                                         | HR (95% CI)                                              | P-value | HR (95% CI)                                                 | P-value |                   |        |
| <b>Esophagus</b>                   | Barrett's esophagus                     | 1.16 (1.02, 1.32)                                        | 0.024   | 1.17 (1.03, 1.33)                                           | 0.016   |                   |        |
|                                    | Gastroesophageal<br>reflux disease      | 0.99 (0.95, 1.05)                                        | 0.830   | 1.02 (0.97, 1.07)                                           | 0.444   |                   |        |
| <b>Stomach and<br/>bowel</b>       | Gastritis and<br>duodenitis             | 1.49 (1.42, 1.56)                                        | <0.001  | 1.53 (1.46, 1.60)                                           | <0.001  |                   |        |
|                                    | Celiac disease                          | 1.26 (0.95, 1.67)                                        | 0.107   | 1.26 (0.96, 1.67)                                           | 0.102   |                   |        |
|                                    | Peptic ulcer                            | 1.44 (1.31, 1.58)                                        | <0.001  | 1.50 (1.37, 1.64)                                           | <0.001  |                   |        |
|                                    | Crohn's disease                         | 1.30 (0.97, 1.73)                                        | 0.077   | 1.32 (0.99, 1.76)                                           | 0.056   |                   |        |
|                                    | Ulcerative colitis                      | 1.05 (0.84, 1.31)                                        | 0.648   | 1.05 (0.85, 1.31)                                           | 0.644   |                   |        |
|                                    | Irritable bowel<br>syndrome             | 1.06 (0.93, 1.20)                                        | 0.383   | 1.10 (0.97, 1.24)                                           | 0.150   |                   |        |
|                                    | Diverticulum                            | 1.13 (1.09, 1.18)                                        | <0.001  | 1.16 (1.11, 1.21)                                           | <0.001  |                   |        |
| <b>Pancreas</b>                    | Pancreatitis                            | 1.39 (1.18, 1.64)                                        | <0.001  | 1.42 (1.21, 1.68)                                           | <0.001  |                   |        |
| <b>Liver</b>                       | Non-alcoholic fatty liver<br>disease    | 2.26 (2.07, 2.47)                                        | <0.001  | 2.30 (2.11, 2.51)                                           | <0.001  |                   |        |
|                                    | Liver cirrhosis                         | 2.69 (2.37, 3.05)                                        | <0.001  | 2.80 (2.48, 3.17)                                           | <0.001  |                   |        |
| <b>Gallbladder and<br/>biliary</b> | Biliary disease                         | 1.15 (1.07, 1.23)                                        | <0.001  | 1.16 (1.08, 1.24)                                           | <0.001  |                   |        |
| <b>Gastrointestinal</b>            | Gastrointestinal tract                  | 1.27 (1.16, 1.39)                                        | <0.001  | 1.28 (1.17, 1.40)                                           | <0.001  |                   |        |

---

|                |                    |     |                   |        |                          |
|----------------|--------------------|-----|-------------------|--------|--------------------------|
| <b>cancers</b> | cancers            |     |                   |        |                          |
|                | Hepatobiliary      | and |                   |        |                          |
|                | pancreatic cancers |     | 2.27 (1.97, 2.62) | <0.001 | 2.28 (1.98, 2.63) <0.001 |

---

Analyses used age-scaled models adjusting for sex, Townsend deprivation index, education, ethnicity, body mass index, smoking status, drinking status, physical activity, and adherence to a healthy diet. The non- type 2 diabetes group was set as the reference. HR-hazard ratio, CI-confidence interval.

**Supplementary table 14 Results of step function for analysis of unmet proportional assumption assumptions over different time intervals (0-5, 5-10, 10- follow-up years)**

| Disease: different time interval group   | Fully adjusted                                        | <i>P</i> -value | Further adjusted                                      | <i>P</i> -value | Further adjusted                                                 | <i>P</i> -value | Further adjusted                     | <i>P</i> -value |
|------------------------------------------|-------------------------------------------------------|-----------------|-------------------------------------------------------|-----------------|------------------------------------------------------------------|-----------------|--------------------------------------|-----------------|
|                                          | model                                                 |                 | for C-reactive protein                                |                 | for INFLA-score                                                  |                 | for proton pump inhibitors           |                 |
|                                          | HR (95% CI)                                           |                 | HR (95% CI)                                           |                 | HR (95% CI)                                                      |                 | HR (95% CI)                          |                 |
| <b>Gastritis and duodenitis</b>          |                                                       |                 |                                                       |                 |                                                                  |                 |                                      |                 |
| Type 2 diabetes: tgroup=1                | 1.37 (1.27, 1.48)                                     | <0.001          | 1.01 (1.01, 1.01)                                     | <0.001          | 1.01 (1.01, 1.01)                                                | <0.001          | 2.07 (1.98, 2.17)                    | <0.001          |
| Type 2 diabetes: tgroup=2                | 1.67 (1.57, 1.78)                                     | <0.001          | 1.37 (1.27, 1.48)                                     | <0.001          | 1.36 (1.27, 1.47)                                                | <0.001          | 1.32 (1.23, 1.42)                    | <0.001          |
| Type 2 diabetes: tgroup=3                | 1.83 (1.64, 2.04)                                     | <0.001          | 1.67 (1.57, 1.78)                                     | <0.001          | 1.66 (1.56, 1.77)                                                | <0.001          | 1.62 (1.52, 1.72)                    | <0.001          |
| <b>Diverticular disease</b>              |                                                       |                 |                                                       |                 |                                                                  |                 |                                      |                 |
| Type 2 diabetes: tgroup=1                | 1.39 (1.33, 1.45)                                     | <0.001          | 1.01 (1.00, 1.01)                                     | <0.001          | 1.01 (1.01, 1.01)                                                | <0.001          | 1.88 (1.82, 1.93)                    | <0.001          |
| Type 2 diabetes: tgroup=2                | 1.42 (1.36, 1.49)                                     | <0.001          | 1.39 (1.33, 1.45)                                     | <0.001          | 1.38 (1.32, 1.45)                                                | <0.001          | 1.35 (1.29, 1.41)                    | <0.001          |
| Type 2 diabetes: tgroup=3                | 1.44 (1.37, 1.52)                                     | <0.001          | 1.42 (1.36, 1.49)                                     | <0.001          | 1.42 (1.35, 1.48)                                                | <0.001          | 1.38 (1.32, 1.45)                    | <0.001          |
| <b>Non-alcoholic fatty liver disease</b> |                                                       |                 |                                                       |                 |                                                                  |                 |                                      |                 |
| Type 2 diabetes: tgroup=1                | 2.82 (2.43, 3.27)                                     | <0.001          | 1.02 (1.01, 1.02)                                     | <0.001          | 1.01 (1.01, 1.02)                                                | <0.001          | 1.58 (1.40, 1.78)                    | <0.001          |
| Type 2 diabetes: tgroup=2                | 2.61 (2.31, 2.95)                                     | <0.001          | 2.82 (2.43, 3.27)                                     | <0.001          | 2.80 (2.41, 3.24)                                                | <0.001          | 2.76 (2.38, 3.20)                    | <0.001          |
| Type 2 diabetes: tgroup=3                | 2.22 (1.85, 2.66)                                     | <0.001          | 2.61 (2.31, 2.95)                                     | <0.001          | 2.59 (2.29, 2.93)                                                | <0.001          | 2.56 (2.26, 2.89)                    | <0.001          |
| Disease: different time interval group   | Further adjusted for baseline cardiovascular diseases |                 | Further adjusted for baseline metabolic abnormalities |                 | Medical records or self-report + abnormal blood glucose/abnormal |                 | ICD codes use E11 instead of E11-E14 |                 |

|                                               |                      |         |                         |         | HbA1c/use of anti-diabetes drugs |         |                   |         |
|-----------------------------------------------|----------------------|---------|-------------------------|---------|----------------------------------|---------|-------------------|---------|
|                                               | HR (95% CI)          | P-value | HR (95% CI)             | P-value | HR (95% CI)                      | P-value | HR (95% CI)       | P-value |
| <b>Gastritis and duodenitis</b>               |                      |         |                         |         |                                  |         |                   |         |
| Type 2 diabetes: tgroup=1                     | 1.28 (1.24, 1.32)    | <0.001  | 1.22 (1.19, 1.26)       | <0.001  | 1.52 (1.39, 1.66)                | <0.001  | 1.37 (1.27, 1.48) | <0.001  |
| Type 2 diabetes: tgroup=2                     | 1.29 (1.20, 1.39)    | <0.001  | 1.33 (1.23, 1.43)       | <0.001  | 1.80 (1.67, 1.94)                | <0.001  | 1.66 (1.56, 1.77) | <0.001  |
| Type 2 diabetes: tgroup=3                     | 1.57 (1.48, 1.68)    | <0.001  | 1.61 (1.51, 1.72)       | <0.001  | 2.07 (1.82, 2.36)                | <0.001  | 1.82 (1.63, 2.03) | <0.001  |
| <b>Diverticular disease</b>                   |                      |         |                         |         |                                  |         |                   |         |
| Type 2 diabetes: tgroup=1                     | 1.15 (1.13, 1.17)    | <0.001  | 1.11 (1.09, 1.13)       | <0.001  | 1.50 (1.43, 1.58)                | <0.001  | 1.39 (1.33, 1.45) | <0.001  |
| Type 2 diabetes: tgroup=2                     | 1.35 (1.29, 1.41)    | <0.001  | 1.37 (1.31, 1.43)       | <0.001  | 1.55 (1.47, 1.64)                | <0.001  | 1.42 (1.35, 1.49) | <0.001  |
| Type 2 diabetes: tgroup=3                     | 1.38 (1.31, 1.44)    | <0.001  | 1.40 (1.33, 1.46)       | <0.001  | 1.59 (1.49, 1.69)                | <0.001  | 1.44 (1.37, 1.52) | <0.001  |
| <b>Non-alcoholic fatty liver disease</b>      |                      |         |                         |         |                                  |         |                   |         |
| Type 2 diabetes: tgroup=1                     | 1.51 (1.40, 1.62)    | <0.001  | 2.00 (1.84, 2.18)       | <0.001  | 2.83 (2.38, 3.36)                | <0.001  | 2.82 (2.43, 3.27) | <0.001  |
| Type 2 diabetes: tgroup=2                     | 2.56 (2.20, 2.97)    | <0.001  | 2.64 (2.28, 3.06)       | <0.001  | 2.64 (2.29, 3.05)                | <0.001  | 2.61 (2.31, 2.95) | <0.001  |
| Type 2 diabetes: tgroup=3                     | 2.37 (2.10, 2.68)    | <0.001  | 2.44 (2.16, 2.75)       | <0.001  | 2.14 (1.72, 2.66)                | <0.001  | 2.21 (1.84, 2.65) | <0.001  |
| <b>Disease: different time interval group</b> |                      |         |                         |         |                                  |         |                   |         |
|                                               | <b>Age ≤60 years</b> |         | <b>Age &gt;60 years</b> |         | <b>Female</b>                    |         | <b>Male</b>       |         |
|                                               | HR (95% CI)          | P-value | HR (95% CI)             | P-value | HR (95% CI)                      | P-value | HR (95% CI)       | P-value |
| <b>Gastritis and duodenitis</b>               |                      |         |                         |         |                                  |         |                   |         |
| Type 2 diabetes: tgroup=1                     | 1.35 (1.21, 1.52)    | <0.001  | 1.38 (1.25, 1.52)       | <0.001  | 1.40 (1.25, 1.57)                | <0.001  | 1.38 (1.25, 1.52) | <0.001  |
| Type 2 diabetes: tgroup=2                     | 1.71 (1.55, 1.88)    | <0.001  | 1.63 (1.50, 1.77)       | <0.001  | 1.61 (1.45, 1.78)                | <0.001  | 1.72 (1.58, 1.87) | <0.001  |

|                                               |                    |                |                    |                |                    |                |                    |                |
|-----------------------------------------------|--------------------|----------------|--------------------|----------------|--------------------|----------------|--------------------|----------------|
| Type 2 diabetes: tgroup=3                     | 1.65 (1.40, 1.96)  | <0.001         | 1.97 (1.70, 2.28)  | <0.001         | 1.55 (1.29, 1.86)  | <0.001         | 2.04 (1.77, 2.34)  | <0.001         |
| <b>Diverticular disease</b>                   |                    |                |                    |                |                    |                |                    |                |
| Type 2 diabetes: tgroup=1                     | 1.40 (1.30, 1.49)  | <0.001         | 1.42 (1.34, 1.51)  | <0.001         | 1.36 (1.27, 1.46)  | <0.001         | 1.43 (1.35, 1.51)  | <0.001         |
| Type 2 diabetes: tgroup=2                     | 1.41 (1.31, 1.51)  | <0.001         | 1.47 (1.38, 1.56)  | <0.001         | 1.36 (1.26, 1.46)  | <0.001         | 1.48 (1.39, 1.57)  | <0.001         |
| Type 2 diabetes: tgroup=3                     | 1.46 (1.36, 1.58)  | <0.001         | 1.44 (1.34, 1.55)  | <0.001         | 1.39 (1.28, 1.51)  | <0.001         | 1.50 (1.40, 1.61)  | <0.001         |
| <b>Non-alcoholic fatty liver disease</b>      |                    |                |                    |                |                    |                |                    |                |
| Type 2 diabetes: tgroup=1                     | 2.84 (2.33, 3.45)  | <0.001         | 2.82 (2.24, 3.54)  | <0.001         | 3.69 (2.97, 4.59)  | <0.001         | 2.34 (1.91, 2.86)  | <0.001         |
| Type 2 diabetes: tgroup=2                     | 2.79 (2.38, 3.28)  | <0.001         | 2.38 (1.96, 2.88)  | <0.001         | 2.39 (1.96, 2.92)  | <0.001         | 2.79 (2.38, 3.26)  | <0.001         |
| Type 2 diabetes: tgroup=3                     | 2.24 (1.78, 2.83)  | <0.001         | 2.19 (1.64, 2.92)  | <0.001         | 2.04 (1.53, 2.72)  | <0.001         | 2.40 (1.89, 3.04)  | <0.001         |
| <b>Disease: different time interval group</b> |                    |                |                    |                |                    |                |                    |                |
|                                               | <b>Non-obesity</b> |                | <b>Obesity</b>     |                | <b>Ever smoker</b> |                | <b>Non smoker</b>  |                |
|                                               | <b>HR (95% CI)</b> | <b>P-value</b> |
| <b>Gastritis and duodenitis</b>               |                    |                |                    |                |                    |                |                    |                |
| Type 2 diabetes: tgroup=1                     | 1.35 (1.22, 1.50)  | <0.001         | 1.45 (1.31, 1.61)  | <0.001         | 1.37 (1.24, 1.52)  | <0.001         | 1.39 (1.24, 1.55)  | <0.001         |
| Type 2 diabetes: tgroup=2                     | 1.70 (1.56, 1.86)  | <0.001         | 1.71 (1.56, 1.87)  | <0.001         | 1.68 (1.54, 1.83)  | <0.001         | 1.66 (1.51, 1.83)  | <0.001         |
| Type 2 diabetes: tgroup=3                     | 1.78 (1.52, 2.09)  | <0.001         | 1.91 (1.63, 2.24)  | <0.001         | 1.89 (1.63, 2.19)  | <0.001         | 1.77 (1.50, 2.08)  | <0.001         |
| <b>Diverticular disease</b>                   |                    |                |                    |                |                    |                |                    |                |
| Type 2 diabetes: tgroup=1                     | 1.36 (1.28, 1.45)  | <0.001         | 1.46 (1.37, 1.56)  | <0.001         | 1.39 (1.31, 1.48)  | <0.001         | 1.40 (1.31, 1.49)  | <0.001         |
| Type 2 diabetes: tgroup=2                     | 1.41 (1.32, 1.50)  | <0.001         | 1.48 (1.38, 1.58)  | <0.001         | 1.43 (1.34, 1.53)  | <0.001         | 1.42 (1.32, 1.52)  | <0.001         |
| Type 2 diabetes: tgroup=3                     | 1.45 (1.34, 1.57)  | <0.001         | 1.50 (1.39, 1.62)  | <0.001         | 1.44 (1.34, 1.55)  | <0.001         | 1.46 (1.35, 1.57)  | <0.001         |
| <b>Non-alcoholic fatty liver disease</b>      |                    |                |                    |                |                    |                |                    |                |
| Type 2 diabetes: tgroup=1                     | 4.17 (3.25, 5.35)  | <0.001         | 2.86 (2.38, 3.44)  | <0.001         | 2.54 (2.07, 3.10)  | <0.001         | 3.23 (2.59, 4.01)  | <0.001         |

|                                               |                        |                |                            |                |                        |                |                     |                |
|-----------------------------------------------|------------------------|----------------|----------------------------|----------------|------------------------|----------------|---------------------|----------------|
| Type 2 diabetes: tgroup=2                     | 3.38 (2.75, 4.17)      | <0.001         | 3.00 (2.58, 3.49)          | <0.001         | 2.51 (2.13, 2.95)      | <0.001         | 2.76 (2.30, 3.32)   | <0.001         |
| Type 2 diabetes: tgroup=3                     | 3.42 (2.55, 4.60)      | <0.001         | 2.31 (1.83, 2.91)          | <0.001         | 2.05 (1.60, 2.64)      | <0.001         | 2.45 (1.89, 3.18)   | <0.001         |
| <b>Disease: different time interval group</b> | <b>Current drinker</b> |                | <b>Non-current drinker</b> |                | <b>Without PPI use</b> |                | <b>With PPI use</b> |                |
|                                               | <b>HR (95% CI)</b>     | <b>P-value</b> | <b>HR (95% CI)</b>         | <b>P-value</b> | <b>HR (95% CI)</b>     | <b>P-value</b> | <b>HR (95% CI)</b>  | <b>P-value</b> |
| <b>Gastritis and duodenitis</b>               |                        |                |                            |                |                        |                |                     |                |
| Type 2 diabetes: tgroup=1                     | 1.33 (1.23, 1.44)      | <0.001         | 1.51 (1.27, 1.79)          | <0.001         | 1.30 (1.20, 1.41)      | <0.001         | 1.45 (1.22, 1.74)   | <0.001         |
| Type 2 diabetes: tgroup=2                     | 1.74 (1.62, 1.86)      | <0.001         | 1.38 (1.16, 1.64)          | <0.001         | 1.63 (1.52, 1.74)      | <0.001         | 1.73 (1.45, 2.07)   | <0.001         |
| Type 2 diabetes: tgroup=3                     | 1.89 (1.68, 2.12)      | <0.001         | 1.67 (1.23, 2.26)          | 0.001          | 1.86 (1.66, 2.09)      | <0.001         | 1.37 (0.96, 1.95)   | 0.079          |
| <b>Diverticular disease</b>                   |                        |                |                            |                |                        |                |                     |                |
| Type 2 diabetes: tgroup=1                     | 1.41 (1.35, 1.48)      | <0.001         | 1.32 (1.18, 1.48)          | <0.001         | 1.36 (1.30, 1.42)      | <0.001         | 1.41 (1.25, 1.58)   | <0.001         |
| Type 2 diabetes: tgroup=2                     | 1.44 (1.36, 1.51)      | <0.001         | 1.37 (1.22, 1.54)          | <0.001         | 1.38 (1.32, 1.46)      | <0.001         | 1.46 (1.29, 1.66)   | <0.001         |
| Type 2 diabetes: tgroup=3                     | 1.46 (1.37, 1.54)      | <0.001         | 1.37 (1.20, 1.56)          | <0.001         | 1.40 (1.32, 1.48)      | <0.001         | 1.50 (1.30, 1.73)   | <0.001         |
| <b>Non-alcoholic fatty liver disease</b>      |                        |                |                            |                |                        |                |                     |                |
| Type 2 diabetes: tgroup=1                     | 2.66 (2.26, 3.12)      | <0.001         | 4.77 (3.19, 7.12)          | <0.001         | 2.80 (2.40, 3.28)      | <0.001         | 2.75 (1.73, 4.35)   | <0.001         |
| Type 2 diabetes: tgroup=2                     | 2.55 (2.23, 2.92)      | <0.001         | 2.95 (2.17, 4.01)          | <0.001         | 2.57 (2.25, 2.92)      | <0.001         | 2.56 (1.79, 3.64)   | <0.001         |
| Type 2 diabetes: tgroup=3                     | 2.15 (1.77, 2.63)      | <0.001         | 2.73 (1.74, 4.31)          | <0.001         | 2.20 (1.81, 2.66)      | <0.001         | 2.34 (1.32, 4.15)   | 0.004          |

Analyses used age-scaled models adjusting for sex, Townsend deprivation index, education, ethnicity, body mass index, smoking status, drinking status, physical activity, and adherence to a healthy diet. The non-type 2 diabetes group was set as the reference. tgroup=1,2,3: calculated the associations between type 2 diabetes and incident gastrointestinal diseases during the first 0-5 years, 5-10 years, more than 10 years after baseline. HR-hazard ratio, CI-confidence interval.
